# Supplementary material for: Identification of Candidate Growth Promoting Genes in Ovarian Cancer through Integrated Copy Number and Expression Analysis
Source: PubMed Central journal article supplement (PMC2851616; doi:10.1371/journal.pone.0009983), 2010-04-08
Supplement: pone.0009983.s001.pdf [file pone.0009983.s001.pdf]

| Sample Name | Subtype      | Grade | Stage | Age | Paired? | SNP array | Expr array |
|-------------|--------------|-------|-------|-----|---------|-----------|------------|
| IC022       | serous       | 3     | 3     | 65  | Y       | Y         | Y          |
| IC026       | serous       | 2     | 3     | 51  | Y       | Y         | Y          |
| IC095       | endometrioid | 3     | 2     | 66  | Y       | Y         | Y          |
| IC121       | mucinous     | 1     | 3     | 77  | Y       | Y         | Y          |
| IC128       | endometrioid | 2     | 1     | 56  | Y       | Y         | Y          |
| IC138       | mucinous     | 1     | 1     | 47  | Y       | Y         | Y          |
| IC151       | endometrioid | 2     | 2     | 56  | Y       | Y         | N          |
| IC179       | endometrioid | 3     | 3     | 62  | Y       | Y         | Y          |
| IC201       | serous       | 2     | 3     | 80  | Y       | Y         | Y          |
| IC220       | endometrioid | 2     | 3     | 62  | Y       | Y         | Y          |
| IC257       | mucinous     | 1     | 1     | 60  | Y       | Y         | Y          |
| IC258       | endometrioid | 3     | 3     | 69  | Y       | Y         | Y          |
| IC288       | serous       | 2     | 3     | 51  | Y       | Y         | Y          |
| IC293       | endometrioid | 3     | 1     | 59  | Y       | Y         | Y          |
| IC300       | endometrioid | 3     | 3     | 68  | Y       | Y         | Y          |
| IC315       | serous       | 3     | -     | 82  | Y       | Y         | Y          |
| IC318       | serous       | 3     | 3     | 70  | Y       | Y         | Y          |
| IC321       | mucinous     | 2     | -     | 47  | Y       | Y         | Y          |
| IC325       | serous       | 3     | -     | 64  | Y       | Y         | Y          |
| IC328       | serous       | 2     | -     | 66  | Y       | Y         | Y          |
| IC349       | clear cell   | 2     | -     | 39  | Y       | Y         | Y          |
| IC382       | serous       | 3     | 3     | 59  | Y       | Y         | Y          |
| IC407       | serous       | 2     | 3     | 83  | Y       | Y         | Y          |
| IC413       | serous       | 3     | 3     | 36  | Y       | Y         | Y          |
| IC419       | clear cell   | 1     | 1     | 65  | Y       | Y         | Y          |
| IC434       | endometrioid | 3     | 1     | 76  | Y       | Y         | Y          |
| IC448       | mucinous     | 1     | 1     | 55  | Y       | Y         | Y          |
| IC487       | serous       | 1     | 3     | 41  | Y       | Y         | Y          |
| IC493       | serous       | 2     | 3     | 61  | Y       | Y         | Y          |
| IC499       | serous       | -     | 2     | 49  | Y       | Y         | Y          |
| IC504       | endometrioid | 3     | 1     | 50  | Y       | Y         | Y          |
| IC511       | clear cell   | 1     | 3     | 61  | Y       | Y         | Y          |
| IC548       | serous       | 1     | 3     | 61  | Y       | Y         | Y          |
| IC549       | clear cell   | 3     | -     | 42  | Y       | Y         | Y          |
| IC557       | mucinous     | 1     | 1     | 35  | N       | Y         | Y          |
| IC579       | serous       | 3     | -     | 71  | N       | Y         | Y          |

|       |              |   |   |    |   |   |   |
|-------|--------------|---|---|----|---|---|---|
| IC580 | endometrioid | 2 | 1 | 70 | Y | Y | Y |
| IC594 | endometrioid | 3 | 1 | 47 | Y | Y | Y |
| P0706 | serous       | 2 | - | 57 | Y | Y | Y |
| P0933 | serous       | 3 | 2 | 85 | Y | Y | Y |
| P0985 | unknown      | 3 | 2 | 74 | N | Y | Y |
| P1049 | serous       | 3 | 2 | 50 | Y | Y | Y |
| P1094 | clear cell   | - | 1 | 55 | Y | Y | Y |
| P1246 | serous       | 2 | 2 | 69 | Y | Y | Y |
| P1348 | serous       | 3 | 2 | 42 | Y | Y | Y |
| P1389 | serous       | - | 2 | 67 | Y | Y | N |
| P1428 | serous       | 2 | 2 | 81 | Y | Y | Y |
| P1436 | serous       | 3 | 3 | 61 | Y | Y | Y |
| P1555 | serous       | 3 | 2 | 52 | Y | Y | Y |
| P1556 | clear cell   | 3 | - | 39 | N | Y | Y |
| P1680 | clear cell   | 3 | 2 | 71 | Y | Y | Y |
| P1768 | endometrioid | 2 | 1 | 51 | Y | Y | Y |
| P1854 | serous       | 2 | 3 | 76 | N | Y | N |
| P1921 | endometrioid | 1 | 1 | 63 | Y | Y | Y |
| P1953 | serous       | 3 | 3 | 51 | N | Y | Y |
| P1977 | endometrioid | 1 | 2 | 72 | N | Y | Y |
| P2125 | serous       | 3 | 3 | 56 | Y | Y | Y |
| P2205 | serous       | - | 1 | 50 | N | Y | Y |
| P2506 | clear cell   | - | 1 | 73 | Y | Y | Y |
| P2712 | serous       | 3 | 1 | 56 | N | Y | Y |
| P2803 | serous       | 2 | 2 | 46 | Y | Y | Y |
| P2808 | mucinous     | 2 | 3 | 55 | Y | Y | Y |
| P4075 | serous       | - | - | 54 | N | Y | Y |
| P4076 | serous       | - | - | 56 | N | Y | N |
| P4085 | serous       | 1 | 2 | 77 | N | Y | Y |
| P4093 | serous       | 3 | - | 60 | N | Y | Y |
| P4178 | serous       | 3 | 3 | 64 | Y | Y | Y |
| P4219 | serous       | 3 | 3 | 44 | Y | Y | Y |
| P4616 | serous       | 3 | 1 | 53 | Y | Y | Y |
| P4684 | serous       | 3 | 3 | 73 | Y | Y | Y |
| P5390 | clear cell   | 2 | 3 | 61 | N | Y | Y |
| P7820 | serous       | 2 | 2 | 54 | N | Y | Y |
