# Supplementary material for: Identification of Candidate Growth Promoting Genes in Ovarian Cancer through Integrated Copy Number and Expression Analysis
Source: PubMed Central journal article supplement (PMC2851616; doi:10.1371/journal.pone.0009983), 2010-04-08
Supplement: pone.0009983.s002.pdf [file pone.0009983.s002.pdf]

| <b>Sample</b> | <b>Subtype</b> | <b>%Genome Gained<br/>(a)</b> | <b>%Genome<br/>Lost (b)</b> | <b>%Genome<br/>Neutral (c)</b> | <b>Total Genome coverage<br/>(a+b+c)</b> |
|---------------|----------------|-------------------------------|-----------------------------|--------------------------------|------------------------------------------|
| IC022         | serous         | 20.2                          | 8.5                         | 66.7                           | 95.4                                     |
| IC026         | serous         | 25.6                          | 21.0                        | 48.3                           | 95.5                                     |
| IC095         | endometrioid   | 19.3                          | 6.8                         | 69.3                           | 95.5                                     |
| IC121         | mucinous       | 0.0                           | 1.8                         | 93.7                           | 95.5                                     |
| IC128         | endometrioid   | 1.3                           | 0.0                         | 94.2                           | 95.5                                     |
| IC138         | mucinous       | 6.0                           | 12.3                        | 77.1                           | 94.9                                     |
| IC151         | endometrioid   | 24.1                          | 13.4                        | 57.9                           | 95.5                                     |
| IC179         | endometrioid   | 18.3                          | 20.5                        | 56.6                           | 95.5                                     |
| IC201         | serous         | 27.8                          | 18.9                        | 48.4                           | 95.5                                     |
| IC220         | endometrioid   | 14.9                          | 15.7                        | 64.9                           | 95.2                                     |
| IC257         | mucinous       | 0.5                           | 0.7                         | 94.3                           | 95.5                                     |
| IC258         | endometrioid   | 15.9                          | 8.8                         | 70.8                           | 95.4                                     |
| IC288         | serous         | 13.3                          | 21.0                        | 61.1                           | 95.3                                     |
| IC293         | endometrioid   | 20.7                          | 16.6                        | 57.9                           | 95.5                                     |
| IC300         | endometrioid   | 13.6                          | 0.6                         | 81.2                           | 95.4                                     |
| IC315         | serous         | 20.7                          | 7.2                         | 67.5                           | 95.3                                     |
| IC318         | serous         | 18.1                          | 11.3                        | 66.0                           | 94.4                                     |
| IC321         | mucinous       | 23.7                          | 8.7                         | 63.0                           | 95.5                                     |
| IC325         | serous         | 1.8                           | 3.4                         | 90.2                           | 95.5                                     |
| IC328         | serous         | 13.7                          | 22.8                        | 58.9                           | 95.2                                     |
| IC349         | clear cell     | 4.0                           | 4.5                         | 87.0                           | 95.4                                     |
| IC382         | serous         | 21.3                          | 19.8                        | 54.1                           | 95.5                                     |
| IC407         | serous         | 26.2                          | 27.9                        | 41.1                           | 95.4                                     |
| IC413         | serous         | 0.0                           | 0.0                         | 95.5                           | 95.5                                     |
| IC419         | clear cell     | 0.9                           | 2.9                         | 91.8                           | 94.9                                     |
| IC434         | endometrioid   | 22.8                          | 12.4                        | 59.7                           | 95.4                                     |
| IC448         | mucinous       | 0.0                           | 0.1                         | 95.3                           | 95.3                                     |
| IC487         | serous         | 0.0                           | 0.0                         | 95.5                           | 95.5                                     |
| IC493         | serous         | 15.7                          | 11.6                        | 68.0                           | 94.5                                     |
| IC499         | serous         | 4.4                           | 20.4                        | 70.6                           | 95.4                                     |
| IC504         | endometrioid   | 23.6                          | 14.9                        | 56.7                           | 95.4                                     |
| IC511         | clear cell     | 8.6                           | 0.1                         | 86.8                           | 95.4                                     |
| IC548         | serous         | 13.6                          | 0.0                         | 81.8                           | 95.2                                     |
| IC549         | clear cell     | 0.0                           | 0.0                         | 95.5                           | 95.5                                     |
| IC557         | mucinous       | 0.1                           | 0.2                         | 95.0                           | 95.4                                     |

|       |              |      |      |      |      |
|-------|--------------|------|------|------|------|
| IC579 | serous       | 13.4 | 10.5 | 71.4 | 95.5 |
| IC580 | endometrioid | 13.5 | 10.3 | 70.6 | 95.4 |
| IC594 | endometrioid | 44.0 | 2.1  | 49.5 | 95.5 |
| P0706 | serous       | 13.8 | 14.5 | 66.8 | 95.2 |
| P0933 | serous       | 14.5 | 4.0  | 77.0 | 95.4 |
| P0985 | unknown      | 10.2 | 6.3  | 78.8 | 95.4 |
| P1049 | serous       | 12.1 | 15.8 | 67.6 | 95.4 |
| P1094 | clear cell   | 16.9 | 4.2  | 74.4 | 95.5 |
| P1246 | serous       | 19.6 | 20.3 | 54.5 | 95.2 |
| P1348 | serous       | 13.5 | 19.4 | 62.5 | 95.5 |
| P1389 | serous       | 19.5 | 13.8 | 61.9 | 95.2 |
| P1428 | serous       | 2.4  | 3.9  | 89.2 | 95.1 |
| P1436 | serous       | 21.9 | 18.1 | 55.2 | 95.4 |
| P1555 | serous       | 8.8  | 16.2 | 70.4 | 95.4 |
| P1556 | clear cell   | 12.3 | 10.0 | 73.1 | 95.4 |
| P1680 | clear cell   | 21.0 | 30.1 | 44.0 | 95.4 |
| P1768 | endometrioid | 0.0  | 1.9  | 93.6 | 95.2 |
| P1854 | serous       | 23.6 | 12.1 | 59.5 | 95.4 |
| P1921 | endometrioid | 24.1 | 19.2 | 51.9 | 95.2 |
| P1953 | serous       | 20.0 | 19.0 | 56.4 | 95.3 |
| P1977 | endometrioid | 14.2 | 1.1  | 80.1 | 95.5 |
| P2125 | serous       | 14.3 | 12.6 | 68.5 | 95.4 |
| P2205 | serous       | 13.3 | 27.2 | 54.9 | 95.3 |
| P2506 | clear cell   | 11.0 | 5.1  | 79.4 | 95.5 |
| P2712 | serous       | 24.4 | 7.1  | 63.9 | 95.5 |
| P2803 | serous       | 9.7  | 28.1 | 57.6 | 95.2 |
| P2808 | mucinous     | 19.0 | 16.8 | 59.4 | 95.3 |
| P4075 | serous       | 17.7 | 16.6 | 61.1 | 95.4 |
| P4076 | serous       | 3.9  | 26.0 | 65.6 | 95.4 |
| P4085 | serous       | 0.6  | 5.1  | 89.6 | 95.4 |
| P4093 | serous       | 12.8 | 20.1 | 62.3 | 95.2 |
| P4178 | serous       | 12.8 | 19.0 | 63.6 | 95.5 |
| P4219 | serous       | 22.1 | 13.2 | 60.0 | 95.3 |
| P4616 | serous       | 11.4 | 25.0 | 59.1 | 95.5 |
| P4684 | serous       | 15.8 | 20.3 | 59.2 | 95.3 |
| P5390 | clear cell   | 10.2 | 9.8  | 75.4 | 95.1 |
| P7820 | serous       | 11.8 | 24.7 | 58.8 | 95.4 |
