# Supplementary material for: Identification of Candidate Growth Promoting Genes in Ovarian Cancer through Integrated Copy Number and Expression Analysis
Source: PubMed Central journal article supplement (PMC2851616; doi:10.1371/journal.pone.0009983), 2010-04-08
Supplement: pone.0009983.s003.pdf [file pone.0009983.s003.pdf]

| Cytoband | Chromosome | Start (bp) | End (bp)  | Region.length | #samples | Type |
|----------|------------|------------|-----------|---------------|----------|------|
| 3p12.3   | 3          | 79210490   | 80913526  | 165860        | 5        | Del  |
| 3p24.2   | 3          | 25810048   | 25816531  | 6489          | 6        | Amp  |
| 3p24.2   | 3          | 25739544   | 25817166  | 77253         | 5        | Del  |
| 3p24.3   | 3          | 23616919   | 23694910  | 54575         | 3        | Del  |
| 3q11.2   | 3          | 97838272   | 97840646  | 2375          | 3        | Del  |
| 3q13.33  | 3          | 122559421  | 122644239 | 84827         | 6        | Amp  |
| 3q13.33  | 3          | 122559421  | 122643114 | 83694         | 5        | Del  |
| 3q22.1   | 3          | 134504447  | 134504492 | 46            | 6        | Del  |
| 3q26.1   | 3          | 168660470  | 168696753 | 36289         | 10       | Amp  |
| 3q26.1   | 3          | 168660470  | 168696753 | 36291         | 12       | Del  |
| 3q26.33  | 3          | 181970431  | 181970843 | 413           | 3        | Del  |
| 7p14.1   | 7          | 42305279   | 42308036  | 2758          | 3        | Del  |
| 7q11.23  | 7          | 73675807   | 73683570  | 7764          | 3        | Amp  |
| 7q21.11  | 7          | 83385157   | 83390443  | 5287          | 13       | Amp  |
| 7q21.11  | 7          | 83385157   | 83390443  | 5288          | 15       | Del  |
| 7q21.3   | 7          | 95107736   | 95107927  | 192           | 4        | Del  |
| 7q22.3   | 7          | 106331207  | 106337089 | 5883          | 6        | Del  |
| 7q31.1   | 7          | 108481492  | 108482037 | 546           | 3        | Del  |
| 7q32.3   | 7          | 131698245  | 131713939 | 15695         | 5        | Amp  |
| 7q36.3   | 7          | 155096769  | 155103094 | 6326          | 3        | Del  |
| 8p11.1   | 8          | 43558059   | 43723631  | 165582        | 9        | Amp  |
| 8p11.1   | 8          | 43580641   | 43722843  | 142207        | 7        | Del  |
| 8p11.21  | 8          | 41661384   | 41666518  | 5136          | 6        | Amp  |
| 8p12     | 8          | 31889700   | 31893094  | 3396          | 6        | Amp  |
| 8p23.2   | 8          | 4356942    | 6033976   | 17889         | 4        | Amp  |
| 8p23.2   | 8          | 4356942    | 6034068   | 17989         | 9        | Del  |
| 8q12.1   | 8          | 60241288   | 60386830  | 145549        | 15       | Amp  |
| 8q12.1   | 8          | 57095066   | 60386830  | 141393        | 10       | Del  |
| 8q12.3   | 8          | 62500852   | 62507335  | 971           | 3        | Amp  |
| 8q12.3   | 8          | 62494870   | 62549426  | 12235         | 4        | Del  |
| 8q21.3   | 8          | 89422381   | 89425564  | 3185          | 4        | Amp  |
| 8q22.2   | 8          | 100101505  | 100112077 | 10574         | 6        | Del  |
| 8q23.1   | 8          | 107680826  | 107681140 | 315           | 9        | Del  |
| 8q23.2   | 8          | 110700157  | 110724393 | 24242         | 5        | Amp  |
| 8q23.2   | 8          | 110700157  | 110722873 | 22723         | 6        | Del  |
| 8q23.3   | 8          | 113491593  | 113663103 | 34355         | 3        | Del  |

|         |    |           |           |        |   |     |
|---------|----|-----------|-----------|--------|---|-----|
| 8q24.13 | 8  | 122651921 | 122660861 | 8942   | 4 | Del |
| 8q24.21 | 8  | 129639246 | 129734934 | 95689  | 3 | Amp |
| 8q24.21 | 8  | 129657194 | 129672109 | 14916  | 3 | Del |
| 8q24.22 | 8  | 135231848 | 135434578 | 200169 | 4 | Amp |
| 8q24.22 | 8  | 135231868 | 135342195 | 10401  | 3 | Del |
| 8q24.23 | 8  | 137609964 | 137616428 | 6465   | 3 | Amp |
| 20p12.1 | 20 | 17332586  | 17456718  | 124149 | 9 | Amp |
| 20p12.1 | 20 | 17317374  | 17455689  | 110392 | 4 | Del |
