# Supplementary material for: Identification of Candidate Growth Promoting Genes in Ovarian Cancer through Integrated Copy Number and Expression Analysis
Source: PubMed Central journal article supplement (PMC2851616; doi:10.1371/journal.pone.0009983), 2010-04-08
Supplement: pone.0009983.s004.pdf [file pone.0009983.s004.pdf]

| Region_ID | Cytoband          | Chr | Start (bp) | End (bp)  | Region length | %Samples | #CN/SNP probesets |
|-----------|-------------------|-----|------------|-----------|---------------|----------|-------------------|
| 3_1       | 3q25.31           | 3   | 157223337  | 157972472 | 739251        | 40       | 494               |
| 3_2       | 3q25.32           | 3   | 158260079  | 159894705 | 1272589       | 40       | 960               |
| 3_3       | 3q25.32 - 3q25.33 | 3   | 159894705  | 159958518 | 63814         | 42       | 48                |
| 3_4       | 3q25.33           | 3   | 159958518  | 161005782 | 985573        | 40       | 684               |
| 3_5       | 3q25.33 - 3q26.1  | 3   | 161005782  | 161392058 | 386277        | 42       | 253               |
| 3_7       | 3q26.1            | 3   | 161392058  | 168915903 | 7388335       | 43       | 4426              |
| 3_9       | 3q26.1 - 3q26.2   | 3   | 168915903  | 169208732 | 292830        | 50       | 191               |
| 3_10      | 3q26.2            | 3   | 169208732  | 172478029 | 3269408       | 53       | 2065              |
| 3_11      | 3q26.2 - 3q26.31  | 3   | 172478029  | 172586020 | 107992        | 53       | 82                |
| 3_12      | 3q26.31           | 3   | 172586020  | 177094525 | 4508624       | 50       | 3122              |
| 3_13      | 3q26.31 - 3q26.32 | 3   | 177094525  | 177366431 | 271907        | 51       | 149               |
| 3_14      | 3q26.32           | 3   | 177366431  | 180517792 | 3151523       | 50       | 2110              |
| 3_15      | 3q26.32 - 3q26.33 | 3   | 180517792  | 180608287 | 90496         | 50       | 40                |
| 3_17      | 3q26.33           | 3   | 180608287  | 184152556 | 3544366       | 50       | 1970              |
| 3_19      | 3q26.33 - 3q27.1  | 3   | 184152556  | 184290998 | 138443        | 49       | 74                |
| 3_20      | 3q27.1            | 3   | 184290998  | 185995678 | 1704709       | 49       | 954               |
| 3_21      | 3q27.1 - 3q27.2   | 3   | 185995678  | 186007206 | 11529         | 50       | 11                |
| 3_22      | 3q27.2            | 3   | 186007206  | 187399115 | 1391946       | 51       | 863               |
| 3_23      | 3q27.2 - 3q27.3   | 3   | 187399115  | 187519179 | 120065        | 50       | 102               |
| 3_24      | 3q27.3            | 3   | 187519179  | 189378616 | 1858952       | 46       | 1506              |
| 3_25      | 3q27.3 - 3q28     | 3   | 189378616  | 189429907 | 51292         | 46       | 37                |
| 3_26      | 3q28              | 3   | 189429907  | 193766085 | 4334415       | 43       | 3180              |
| 3_27      | 3q28 - 3q29       | 3   | 193766085  | 193936360 | 170276        | 44       | 142               |
| 3_28      | 3q29              | 3   | 193936360  | 199337204 | 5342594       | 43       | 3091              |
| 7_1       | 7q34              | 7   | 141416100  | 141430833 | 13536         | 40       | 21                |
| 8_1       | 8q11.23           | 8   | 53389772   | 55544620  | 1565570       | 42       | 1434              |
| 8_2       | 8q11.23 - 8q12.1  | 8   | 55544620   | 55651731  | 107112        | 44       | 82                |
| 8_6       | 8q12.1            | 8   | 55651731   | 61696140  | 6040855       | 44       | 4078              |
| 8_7       | 8q12.1 - 8q12.2   | 8   | 61696140   | 61817420  | 121281        | 46       | 99                |
| 8_8       | 8q12.2            | 8   | 61817420   | 62337503  | 520100        | 44       | 381               |
| 8_9       | 8q12.2 - 8q12.3   | 8   | 62337503   | 62494870  | 157368        | 46       | 108               |
| 8_11      | 8q12.3            | 8   | 62494870   | 65928146  | 3433364       | 43       | 2102              |
| 8_14      | 8q12.3 - 8q13.1   | 8   | 65928146   | 66236864  | 308719        | 42       | 150               |
| 8_15      | 8q13.1            | 8   | 66236864   | 68051346  | 1814513       | 43       | 952               |
| 8_16      | 8q13.1 - 8q13.2   | 8   | 68051346   | 68292309  | 240964        | 42       | 87                |

|      |                   |   |           |           |         |    |      |
|------|-------------------|---|-----------|-----------|---------|----|------|
| 8_17 | 8q13.2            | 8 | 68292309  | 70433174  | 2135937 | 42 | 1444 |
| 8_18 | 8q13.2 - 8q13.3   | 8 | 70433174  | 70815464  | 382291  | 43 | 314  |
| 8_19 | 8q13.3            | 8 | 70815464  | 73992590  | 2922091 | 43 | 2101 |
| 8_20 | 8q13.3 - 8q21.11  | 8 | 73992590  | 74016246  | 23657   | 42 | 16   |
| 8_21 | 8q21.11           | 8 | 74016246  | 78270404  | 4247517 | 42 | 2646 |
| 8_22 | 8q21.11 - 8q21.12 | 8 | 78270404  | 79275760  | 1005357 | 43 | 613  |
| 8_23 | 8q21.12           | 8 | 79275760  | 80255394  | 979659  | 44 | 567  |
| 8_24 | 8q21.12 - 8q21.13 | 8 | 80255394  | 80418549  | 163156  | 44 | 127  |
| 8_25 | 8q21.13           | 8 | 80418549  | 84683102  | 4264637 | 44 | 2471 |
| 8_26 | 8q21.13 - 8q21.2  | 8 | 84683102  | 85121597  | 438496  | 47 | 275  |
| 8_27 | 8q21.2            | 8 | 85121597  | 87055390  | 1933813 | 47 | 1008 |
| 8_28 | 8q21.2 - 8q21.3   | 8 | 87055390  | 87250134  | 194745  | 47 | 138  |
| 8_30 | 8q21.3            | 8 | 87250134  | 93277536  | 6027501 | 50 | 3573 |
| 8_32 | 8q21.3 - 8q22.1   | 8 | 93277536  | 93587044  | 309509  | 54 | 163  |
| 8_33 | 8q22.1            | 8 | 93587044  | 98636746  | 5049839 | 51 | 3383 |
| 8_34 | 8q22.1 - 8q22.2   | 8 | 98636746  | 99158628  | 521883  | 51 | 330  |
| 8_36 | 8q22.2            | 8 | 99158628  | 101579497 | 2420915 | 51 | 1215 |
| 8_38 | 8q22.2 - 8q22.3   | 8 | 101579497 | 101675295 | 95799   | 53 | 52   |
| 8_39 | 8q22.3            | 8 | 101675295 | 105906496 | 4231356 | 53 | 2760 |
| 8_40 | 8q22.3 - 8q23.1   | 8 | 105906496 | 106109752 | 203257  | 57 | 136  |
| 8_42 | 8q23.1            | 8 | 106109752 | 110578384 | 4468693 | 56 | 2859 |
| 8_45 | 8q23.1 - 8q23.2   | 8 | 110578384 | 110759734 | 181351  | 54 | 125  |
| 8_48 | 8q23.2            | 8 | 110759734 | 112170690 | 1410978 | 53 | 749  |
| 8_49 | 8q23.2 - 8q23.3   | 8 | 112170690 | 112351107 | 180418  | 54 | 106  |
| 8_51 | 8q23.3            | 8 | 112351107 | 117486703 | 5126896 | 54 | 3013 |
| 8_53 | 8q23.3 - 8q24.11  | 8 | 117486703 | 117712954 | 226252  | 57 | 174  |
| 8_54 | 8q24.11           | 8 | 117712954 | 119185600 | 1472671 | 57 | 1028 |
| 8_55 | 8q24.11 - 8q24.12 | 8 | 119185600 | 119298314 | 112715  | 57 | 97   |
| 8_56 | 8q24.12           | 8 | 119298314 | 121982811 | 2684590 | 57 | 1924 |
| 8_58 | 8q24.12 - 8q24.13 | 8 | 121982811 | 122934934 | 952124  | 58 | 655  |
| 8_60 | 8q24.13           | 8 | 122934934 | 127209335 | 4274513 | 60 | 3024 |
| 8_61 | 8q24.13 - 8q24.21 | 8 | 127209335 | 127319855 | 110521  | 63 | 74   |
| 8_63 | 8q24.21           | 8 | 127319855 | 131498905 | 4179160 | 61 | 3041 |
| 8_67 | 8q24.21 - 8q24.22 | 8 | 131498905 | 131595877 | 96973   | 61 | 69   |
| 8_69 | 8q24.22           | 8 | 131595877 | 136466442 | 4870682 | 60 | 4090 |
| 8_73 | 8q24.22 - 8q24.23 | 8 | 136466442 | 136568349 | 101908  | 61 | 70   |
| 8_75 | 8q24.23           | 8 | 136568349 | 139943689 | 3375426 | 60 | 2793 |

|       |                     |    |           |           |         |    |      |
|-------|---------------------|----|-----------|-----------|---------|----|------|
| 8_77  | 8q24.23 - 8q24.3    | 8  | 139943689 | 140056011 | 112323  | 60 | 90   |
| 8_78  | 8q24.3              | 8  | 140056011 | 146268947 | 6208543 | 60 | 3342 |
| 20_1  | 20q11.21            | 20 | 29299120  | 31464970  | 2128132 | 42 | 1188 |
| 20_2  | 20q11.21 - 20q11.22 | 20 | 31466294  | 31647667  | 181374  | 40 | 60   |
| 20_4  | 20q11.22            | 20 | 31648845  | 33759769  | 1554149 | 40 | 964  |
| 20_6  | 20q11.23            | 20 | 33957942  | 37048849  | 1984152 | 40 | 1822 |
| 20_7  | 20q12               | 20 | 37107381  | 41095146  | 3924255 | 42 | 3115 |
| 20_8  | 20q12 - 20q13.11    | 20 | 41095146  | 41113240  | 18095   | 40 | 20   |
| 20_9  | 20q13.11            | 20 | 41123607  | 41225982  | 102378  | 40 | 105  |
| 20_10 | 20q13.12            | 20 | 42961935  | 45771727  | 1399743 | 42 | 2009 |
| 20_11 | 20q13.12 - 20q13.13 | 20 | 45771821  | 45835796  | 63976   | 40 | 37   |
| 20_12 | 20q13.13            | 20 | 45849914  | 49179606  | 1142528 | 40 | 2385 |
| 20_13 | 20q13.13 - 20q13.2  | 20 | 49179606  | 49222255  | 42650   | 42 | 44   |
| 20_14 | 20q13.2             | 20 | 49222255  | 54379233  | 5152309 | 43 | 4211 |
| 20_15 | 20q13.2 - 20q13.31  | 20 | 54379233  | 54417168  | 37936   | 42 | 31   |
| 20_16 | 20q13.31            | 20 | 54417168  | 55828083  | 1407348 | 42 | 1146 |
| 20_17 | 20q13.31 - 20q13.32 | 20 | 55828083  | 55991018  | 162936  | 44 | 166  |
| 20_18 | 20q13.32            | 20 | 55991018  | 57887358  | 1896377 | 43 | 1455 |
| 20_19 | 20q13.32 - 20q13.33 | 20 | 57887358  | 57900659  | 13302   | 43 | 6    |
| 20_20 | 20q13.33            | 20 | 57900659  | 62426585  | 4399113 | 46 | 2909 |
