# Supplementary material for: Identification of Candidate Growth Promoting Genes in Ovarian Cancer through Integrated Copy Number and Expression Analysis
Source: PubMed Central journal article supplement (PMC2851616; doi:10.1371/journal.pone.0009983), 2010-04-08
Supplement: pone.0009983.s005.pdf [file pone.0009983.s005.pdf]

| Region-name | Expression-Probeset-ID | Gene            | Number-of-CN-probesets | Pearson-correlation | logFC | AveExpr | t    | P.Value | adj.P.Val | -logP |
|-------------|------------------------|-----------------|------------------------|---------------------|-------|---------|------|---------|-----------|-------|
| 8_9         | 8146618                | RLBP1L1         | 167                    | 0.75                | -     | 6.18    | -    | -       | 1.3E-04   | 12.89 |
| 8_8         | 8146579                | CHD7            | 146                    | 0.68                | -     | 8.12    | -    | -       | 6.6E-04   | 10.57 |
| 8_78        | 8148674                | MAPK15          | 0                      | #N/A                | 0.29  | 7.76    | 2.69 | 8.9E-03 | 1.3E-02   | 6.28  |
| 8_78        | 8148796                | SCXB            | 0                      | #N/A                | 0.46  | 6.47    | 3.89 | 2.3E-04 | 4.4E-04   | 11.15 |
| 8_78        | 8148821                | ENST00000340210 | 0                      | #N/A                | 0.46  | 6.47    | 3.89 | 2.3E-04 | 4.4E-04   | 11.15 |
| 8_78        | 8148772                | C8orf30A        | 0                      | #N/A                | 0.24  | 7.82    | 4.34 | 4.5E-05 | 9.8E-05   | 13.32 |
| 8_78        | 8148799                | C8orf30A        | 0                      | #N/A                | 0.29  | 7.72    | 5.04 | 3.3E-06 | 1.1E-05   | 16.45 |
| 8_78        | 8148808                | KIAA1833        | 0                      | #N/A                | 0.49  | 7.45    | 5.86 | 1.3E-07 | 7.9E-07   | 20.27 |
| 8_78        | 8153664                | BOP1            | 0                      | #N/A                | 0.41  | 7.80    | 6.41 | 1.4E-08 | 1.7E-07   | 22.51 |
| 8_78        | 8148941                | ZNF7            | 27                     | 0.80                | 0.39  | 7.16    | 6.54 | 8.0E-09 | 1.4E-07   | 22.79 |
| 8_78        | 8148658                | ZNF623          | 18                     | 0.72                | 0.68  | 7.40    | 5.81 | 1.6E-07 | 8.3E-07   | 20.20 |
| 8_78        | 8153411                | ZC3H3           | 34                     | 0.72                | 0.49  | 7.15    | 7.28 | 3.5E-10 | 4.2E-08   | 24.49 |
| 8_78        | 8153175                | NIBP            | 496                    | 0.70                | 0.41  | 8.01    | 4.91 | 5.5E-06 | 1.6E-05   | 15.98 |
| 8_78        | 8148467                | CHRAC1          | 7                      | 0.69                | 0.46  | 7.40    | 6.12 | 4.6E-08 | 3.5E-07   | 21.45 |
| 8_78        | 8153876                | KIAA1688        | 30                     | 0.68                | 0.43  | 6.98    | 5.81 | 1.6E-07 | 8.3E-07   | 20.20 |
| 8_78        | 8153390                | TOP1MT          | 26                     | 0.68                | 0.43  | 7.73    | 4.53 | 2.3E-05 | 5.4E-05   | 14.18 |
| 8_78        | 8153819                | CYHR1           | 18                     | 0.67                | 0.84  | 7.15    | 6.75 | 3.3E-09 | 1.1E-07   | 23.10 |
| 8_78        | 8148694                | GRINA           | 5                      | 0.67                | 0.63  | 8.13    | 6.17 | 3.7E-08 | 3.5E-07   | 21.45 |
| 8_78        | 8153896                | ZNF34           | 17                     | 0.67                | 0.34  | 6.30    | 5.36 | 9.9E-07 | 4.1E-06   | 17.89 |
| 8_78        | 8153652                | SHARPIN         | 10                     | 0.67                | 0.44  | 8.39    | 6.48 | 1.0E-08 | 1.5E-07   | 22.64 |
| 8_78        | 8153449                | EEF1D           | 10                     | 0.67                | 0.39  | 9.35    | 3.47 | 8.9E-04 | 1.5E-03   | 9.35  |
| 8_78        | 8153223                | PTK2            | 207                    | 0.67                | 0.45  | 8.87    | 3.67 | 4.7E-04 | 8.5E-04   | 10.20 |
| 8_78        | 8148783                | KIAA1833        | 44                     | 0.66                | 0.67  | 7.91    | 4.98 | 4.2E-06 | 1.2E-05   | 16.30 |
| 8_78        | 8153609                | PARP10          | 5                      | 0.66                | 0.43  | 7.59    | 6.13 | 4.4E-08 | 3.5E-07   | 21.45 |
| 8_78        | 8153536                | PUF60           | 8                      | 0.66                | 0.72  | 8.87    | 6.93 | 1.6E-09 | 9.4E-08   | 23.34 |
| 8_78        | 8148662                | ZNF707          | 14                     | 0.66                | 0.47  | 6.80    | 6.14 | 4.2E-08 | 3.5E-07   | 21.45 |
| 8_78        | 8153727                | CPSF1           | 7                      | 0.65                | 0.57  | 7.93    | 5.16 | 2.1E-06 | 7.8E-06   | 16.96 |
| 8_78        | 8153920                | ZNF250          | 31                     | 0.65                | 0.53  | 7.46    | 5.32 | 1.1E-06 | 4.6E-06   | 17.73 |
| 8_78        | 8148824                | HSF1            | 14                     | 0.64                | 0.54  | 8.38    | 6.57 | 7.0E-09 | 1.4E-07   | 22.79 |
| 8_78        | 8153678                | BOP1            | 9                      | 0.64                | 0.39  | 7.74    | 4.99 | 4.1E-06 | 1.2E-05   | 16.30 |
| 8_78        | 8148955                | C8orf33         | 11                     | 0.63                | 0.61  | 7.92    | 6.31 | 2.1E-08 | 2.3E-07   | 22.08 |
| 8_78        | 8148597                | ZFP41           | 9                      | 0.62                | 0.34  | 6.71    | 4.92 | 5.5E-06 | 1.6E-05   | 15.98 |
| 8_78        | 8148841                | GPR172A         | 4                      | 0.62                | 0.53  | 8.30    | 6.72 | 3.7E-09 | 1.1E-07   | 23.10 |
| 8_78        | 8153457                | AY358690        | 7                      | 0.61                | 0.36  | 7.00    | 4.88 | 6.3E-06 | 1.7E-05   | 15.81 |
| 8_78        | 8153568                | PLEC1           | 11                     | 0.61                | 0.56  | 8.51    | 4.57 | 2.0E-05 | 5.0E-05   | 14.30 |
| 8_78        | 8153911                | COMMD5          | 26                     | 0.61                | 0.26  | 7.42    | 5.12 | 2.5E-06 | 8.6E-06   | 16.83 |
| 8_78        | 8153497                | SCRIB           | 8                      | 0.61                | 0.53  | 7.73    | 6.62 | 5.6E-09 | 1.4E-07   | 22.81 |
| 8_78        | 8153488                | FAM83H          | 3                      | 0.61                | 0.57  | 7.48    | 5.91 | 1.1E-07 | 6.8E-07   | 20.48 |
| 8_78        | 8148715                | GPA1            | 13                     | 0.61                | 0.56  | 8.27    | 5.50 | 5.7E-07 | 2.6E-06   | 18.55 |
| 8_78        | 8148642                | GSDMDC1         | 8                      | 0.60                | 0.46  | 7.18    | 6.12 | 4.5E-08 | 3.5E-07   | 21.45 |
| 8_78        | 8148476                | DENND3          | 67                     | 0.60                | 0.35  | 7.02    | 4.21 | 7.4E-05 | 1.6E-04   | 12.63 |
| 8_78        | 8148728                | CYC1            | 10                     | 0.60                | 0.89  | 8.58    | 6.03 | 6.7E-08 | 4.8E-07   | 21.00 |
| 8_78        | 8153328                | JRK             | 16                     | 0.60                | 0.26  | 7.72    | 4.17 | 8.4E-05 | 1.7E-04   | 12.49 |
| 8_78        | 8153304                | TSNARE1         | 103                    | 0.59                | 0.32  | 7.18    | 4.67 | 1.4E-05 | 3.5E-05   | 14.81 |
| 8_78        | 8148737                | MAF1            | 5                      | 0.58                | 0.53  | 8.11    | 6.45 | 1.1E-08 | 1.5E-07   | 22.64 |
| 8_78        | 8153201                | EIF2C2          | 60                     | 0.57                | 0.50  | 7.89    | 3.95 | 1.8E-04 | 3.7E-04   | 11.40 |
| 8_78        | 8148710                | EXOSC4          | 11                     | 0.57                | 0.32  | 7.36    | 5.01 | 3.8E-06 | 1.2E-05   | 16.31 |
| 8_78        | 8153709                | FBXL6           | 11                     | 0.56                | 0.30  | 6.91    | 4.45 | 3.1E-05 | 6.8E-05   | 13.85 |
| 8_78        | 8148501                | PTP4A3          | 4                      | 0.56                | 0.64  | 8.08    | 5.14 | 2.4E-06 | 8.4E-06   | 16.87 |
| 8_78        | 8153935                | ZNF252          | 18                     | 0.56                | 0.65  | 6.25    | 3.87 | 2.4E-04 | 4.6E-04   | 11.08 |
| 8_78        | 8153550                | NRBP2           | 12                     | 0.53                | 0.55  | 7.76    | 3.84 | 2.6E-04 | 5.0E-04   | 10.98 |
| 8_78        | 8148515                | ---             | 17                     | 0.53                | 0.23  | 5.02    | 2.38 | 2.0E-02 | 2.8E-02   | 5.18  |
| 8_78        | 8153474                | TSTA3           | 17                     | 0.53                | 0.73  | 8.36    | 4.83 | 7.6E-06 | 2.1E-05   | 15.57 |
| 8_78        | 8153903                | RPL8            | 13                     | 0.53                | 0.48  | 10.49   | 3.25 | 1.8E-03 | 2.9E-03   | 8.44  |
| 8_78        | 8148559                | C8orf55         | 9                      | 0.53                | 0.41  | 6.86    | 5.21 | 1.8E-06 | 6.9E-06   | 17.15 |
| 8_78        | 8148572                | LY8E            | 9                      | 0.53                | 1.09  | 9.38    | 4.99 | 4.2E-06 | 1.2E-05   | 16.30 |
| 8_78        | 8153823                | CYHR1           | 11                     | 0.52                | 0.36  | 7.43    | 5.18 | 2.0E-06 | 7.4E-06   | 17.04 |
| 8_78        | 8153459                | PYCR1           | 10                     | 0.51                | 0.29  | 7.16    | 4.79 | 8.9E-06 | 2.4E-05   | 15.38 |
| 8_78        | 8153790                | NFKBIL2         | 13                     | 0.51                | 0.29  | 7.18    | 4.59 | 1.9E-05 | 4.8E-05   | 14.36 |
| 8_78        | 8153625                | OPLAH           | 4                      | 0.51                | 0.44  | 6.99    | 5.56 | 4.4E-07 | 2.1E-06   | 18.83 |
| 8_78        | 8148888                | PPP1R16A        | 2                      | 0.50                | 0.37  | 7.66    | 5.00 | 4.0E-06 | 1.2E-05   | 16.30 |
| 8_78        | 8153776                | VPS28           | 3                      | 0.50                | 0.61  | 8.00    | 5.93 | 9.9E-08 | 6.7E-07   | 20.52 |
| 8_78        | 8148867                | KIFC2           | 16                     | 0.50                | 0.38  | 7.25    | 4.50 | 2.6E-05 | 5.8E-05   | 14.06 |
| 8_78        | 8148621                | RHPN1           | 7                      | 0.49                | 0.30  | 7.68    | 3.81 | 3.0E-04 | 5.5E-04   | 10.83 |
| 8_78        | 8148692                | ENST00000355099 | 8                      | 0.48                | 0.24  | 6.68    | 3.02 | 3.5E-03 | 5.3E-03   | 7.56  |
| 8_78        | 8153684                | DGAT1           | 5                      | 0.48                | 0.51  | 7.97    | 5.36 | 9.8E-07 | 4.1E-06   | 17.89 |
| 8_78        | 8153890                | ENST00000292562 | 13                     | 0.47                | 0.35  | 7.49    | 3.40 | 1.1E-03 | 1.9E-03   | 9.06  |
| 8_78        | 8148615                | ZNF696          | 14                     | 0.47                | 0.20  | 7.04    | 3.19 | 2.1E-03 | 3.3E-03   | 8.24  |
| 8_78        | 8148923                | LRRC14          | 1                      | 0.47                | 0.42  | 7.57    | 5.84 | 1.4E-07 | 8.1E-07   | 20.24 |
| 8_78        | 8153405                | C8orf51         | 7                      | 0.46                | 0.23  | 6.76    | 3.34 | 1.3E-03 | 2.2E-03   | 8.82  |
| 8_78        | 8148917                | MFSD3           | 1                      | 0.46                | 0.43  | 7.57    | 5.57 | 4.2E-07 | 2.1E-06   | 18.85 |
| 8_78        | 8148850                | ADCK5           | 13                     | 0.45                | 0.25  | 7.07    | 4.48 | 2.8E-05 | 6.3E-05   | 13.95 |
| 8_78        | 8153868                | ENST00000313465 | 2                      | 0.43                | 0.26  | 7.23    | 4.10 | 1.1E-04 | 2.2E-04   | 12.13 |
| 8_78        | 8148671                | BREA2           | 10                     | 0.42                | 0.23  | 6.63    | 2.87 | 5.4E-03 | 8.1E-03   | 6.94  |
| 8_78        | 8153258                | ENST0000037746  | 12                     | 0.41                | 0.74  | 6.99    | 4.56 | 2.1E-05 | 5.0E-05   | 14.30 |
| 8_78        | 8148553                | LY6K            | 10                     | 0.40                | 0.22  | 6.54    | 2.76 | 7.3E-03 | 1.1E-02   | 6.54  |
| 8_78        | 8148580                | C8orf31         | 12                     | 0.40                | 0.24  | 6.74    | 2.86 | 5.6E-03 | 8.4E-03   | 6.90  |
| 8_78        | 8148607                | GLI4            | 8                      | 0.39                | 0.20  | 7.08    | 3.26 | 1.7E-03 | 2.8E-03   | 8.47  |
| 8_78        | 8153262                | SLC45A4         | 25                     | 0.38                | 0.62  | 7.49    | 4.54 | 2.2E-05 | 5.3E-05   | 14.21 |
| 8_78        | 8148748                | KIAA1875        | 12                     | 0.37                | 0.20  | 6.62    | 2.70 | 8.6E-03 | 1.3E-02   | 6.31  |
| 8_78        | 8153346                | LYNX1           | 9                      | 0.37                | 0.24  | 7.58    | 2.59 | 1.1E-02 | 1.6E-02   | 5.93  |
| 8_78        | 8153930                | ZNF16           | 32                     | 0.36                | 0.38  | 6.90    | 5.49 | 5.8E-07 | 2.6E-06   | 18.55 |
| 8_78        | 8153835                | ENST00000355148 | 4                      | 0.35                | 0.28  | 6.64    | 3.20 | 2.0E-03 | 3.2E-03   | 8.28  |
| 8_78        | 8153838                | RECQL4          | 1                      | 0.35                | 0.25  | 7.30    | 3.63 | 5.3E-04 | 9.6E-04   | 10.02 |
| 8_78        | 8153363                | CYP11B1         | 16                     | 0.35                | 0.20  | 6.99    | 2.31 | 2.4E-02 | 3.3E-02   | 4.92  |
| 8_78        | 8148640                | ---             | 6                      | 0.34                | 0.17  | 7.33    | 2.45 | 1.7E-02 | 2.4E-02   | 5.39  |
| 8_78        | 8153430                | NAPRT1          | 8                      | 0.34                | 0.23  | 7.64    | 3.34 | 1.3E-03 | 2.2E-03   | 8.82  |
| 8_78        | 8148951                | C8orf77         | 16                     | 0.33                | 0.16  | 6.49    | 2.27 | 2.7E-02 | 3.6E-02   | 4.79  |
| 8_78        | 8148655                | TIGD5           | 6                      | 0.31                | 0.21  | 7.09    | 3.58 | 6.1E-04 | 1.1E-03   | 9.86  |
| 8_78        | 8153762                | SLC39A4         | 9                      | 0.31                | 0.23  | 7.57    | 3.06 | 3.2E-03 | 4.9E-03   | 7.68  |
| 8_78        | 8153424                | C8orf73         | 4                      | 0.15                | 0.49  | 6.57    | 3.59 | 6.0E-04 | 1.1E-03   | 9.87  |
| 8_77        | 8153101                | COL22A1         | 326                    | 0.36                | -     | 7.22    | -    | -       | 6.4E-03   | 7.28  |
| 8_76        | 8153101                | COL22A1         | 326                    | 0.36                | 0.23  | 7.22    | 3.15 | 2.1E-03 | 4.2E-03   | 7.89  |
| 8_76        | 8153071                | FAM135B         | 355                    | 0.35                | 0.23  | 5.84    | 2.71 | 7.7E-03 | 7.7E-03   | 7.02  |
| 8_75        | 8153069                | ---             | 15                     | 0.37                | 0.16  | 4.26    | 2.58 | 1.2E-02 | 2.4E-02   | 5.37  |
| 8_72        | 8153043                | ZFAT1           | 236                    | 0.62                | 0.39  | 6.71    | 5.75 | 1.8E-07 | 5.3E-07   | 20.84 |
| 8_72        | 8153067                | hsa-mir-30d     | 10                     | 0.38                | 0.16  | 4.11    | 2.92 | 4.6E-03 | 6.9E-03   | 7.19  |
| 8_7         | 8146579                | CHD7            | 146                    | 0.68                | 0.69  | 8.08    | 3.78 | 1.6E-04 | 1.6E-04   | 12.62 |
| 8_7         | 8146564                | RAB2A           | 76                     | 0.65                | 0.85  | 8.54    | 4.67 | 3.0E-06 | 6.0E-06   | 17.34 |
| 8_69        | 8148358                | PHF20L1         | 52                     | 0.57                | 0.37  | 6.80    | 2.92 | 4.8E-03 | 1.6E-02   | 5.94  |
| 8_69        | 8148385                | TG              | 298                    | 0.48                | 0.26  | 6.38    | 3.26 | 1.7E-03 | 1.5E-02   | 6.09  |
| 8_69        | 8148435                | WISP1           | 69                     | 0.45                | 0.27  | 7.07    | 2.86 | 5.7E-03 | 1.6E-02   | 5.94  |
| 8_69        | 8148333                | KIAA0143        | 65                     | 0.42                | 0.51  | 8.42    | 2.87 | 5.5E-03 | 1.6E-02   | 5.94  |
| 8_69        | 8152924                | OC90            | 46                     | 0.39                | 0.26  | 6.41    | 3.09 | 2.9E-03 | 1.5E-02   | 6.09  |
| 8_69        | 8152946                | KCNQ3           | 326                    | 0.39                | 0.22  | 6.94    | 3.11 | 2.7E-03 | 1.5E-02   | 6.09  |

|      |         |                 |     |      |      |       |      |         |         |       |
|------|---------|-----------------|-----|------|------|-------|------|---------|---------|-------|
| 8_69 | 8153002 | NDRG1           | 73  | 0.39 | 0.72 | 9.22  | 3.33 | 1.4E-03 | 1.5E-02 | 6.09  |
| 8_69 | 8152988 | SLA             | 107 | 0.33 | 0.34 | 6.19  | 2.62 | 1.1E-02 | 2.7E-02 | 5.19  |
| 8_69 | 8152938 | ENST00000262283 | 29  | 0.27 | 0.20 | 5.72  | 2.51 | 1.4E-02 | 3.2E-02 | 4.96  |
| 8_66 | 8152900 | ENST00000363434 | 11  | 0.55 | 0.25 | 5.09  | 2.56 | 1.3E-02 | 3.3E-02 | 4.91  |
| 8_66 | 8152845 | FAM49B          | 83  | 0.48 | 0.60 | 7.30  | 3.72 | 4.1E-04 | 3.2E-03 | 8.27  |
| 8_66 | 8152867 | DDEF1           | 236 | 0.46 | 0.36 | 7.86  | 2.40 | 1.9E-02 | 3.8E-02 | 4.71  |
| 8_66 | 8152828 | MLZE            | 65  | 0.43 | 0.54 | 5.48  | 2.80 | 6.6E-03 | 2.6E-02 | 5.24  |
| 8_63 | 8152812 | FAM84B          | 12  | 0.64 | 0.61 | 6.96  | 3.54 | 6.9E-04 | 5.5E-03 | 7.51  |
| 8_63 | 8152819 | ---             | 21  | 0.34 | 0.29 | 6.49  | 2.66 | 9.4E-03 | 3.8E-02 | 4.73  |
| 8_60 | 8152648 | C8orf76         | 14  | 0.79 | 0.56 | 6.37  | 6.01 | 8.0E-08 | 3.2E-06 | 18.26 |
| 8_60 | 8152628 | DERL1           | 31  | 0.70 | 0.90 | 8.12  | 5.63 | 3.6E-07 | 4.8E-06 | 17.67 |
| 8_60 | 8148198 | C8orf32         | 34  | 0.68 | 0.53 | 6.41  | 4.69 | 1.3E-05 | 5.9E-05 | 14.05 |
| 8_60 | 8148263 | TRMT12          | 11  | 0.68 | 0.61 | 6.66  | 5.31 | 1.3E-06 | 1.0E-05 | 16.57 |
| 8_60 | 8148265 | RNF139          | 19  | 0.66 | 0.56 | 7.21  | 5.78 | 2.0E-07 | 3.9E-06 | 17.95 |
| 8_60 | 8148158 | WDR67           | 78  | 0.65 | 0.51 | 6.18  | 4.10 | 1.1E-04 | 3.7E-04 | 11.40 |
| 8_60 | 8152750 | TMEM65          | 34  | 0.64 | 0.52 | 7.05  | 4.75 | 1.1E-05 | 5.3E-05 | 14.20 |
| 8_60 | 8148280 | SQLE            | 22  | 0.62 | 0.85 | 8.16  | 4.60 | 1.9E-05 | 7.5E-05 | 13.71 |
| 8_60 | 8152668 | ATAD2           | 33  | 0.61 | 1.04 | 7.53  | 5.48 | 6.5E-07 | 6.5E-06 | 17.22 |
| 8_60 | 8148270 | NDUFB9          | 23  | 0.60 | 0.77 | 8.08  | 5.09 | 3.0E-06 | 2.0E-05 | 15.62 |
| 8_60 | 8148293 | NSMCE2          | 165 | 0.58 | 0.58 | 6.84  | 4.42 | 3.7E-05 | 1.3E-04 | 12.87 |
| 8_60 | 8148276 | ZNF572          | 13  | 0.57 | 0.48 | 6.06  | 4.77 | 1.0E-05 | 5.3E-05 | 14.20 |
| 8_60 | 8152656 | ZHX1            | 20  | 0.55 | 0.42 | 6.85  | 3.52 | 7.8E-04 | 1.8E-03 | 9.09  |
| 8_60 | 8152782 | KIAA0196        | 67  | 0.55 | 0.55 | 7.37  | 3.84 | 2.7E-04 | 8.3E-04 | 10.23 |
| 8_60 | 8148184 | FAM83A          | 23  | 0.54 | 0.49 | 6.78  | 3.59 | 6.1E-04 | 1.7E-03 | 9.23  |
| 8_60 | 8148208 | FAM91A1         | 25  | 0.54 | 0.62 | 8.01  | 3.59 | 6.2E-04 | 1.7E-03 | 9.23  |
| 8_60 | 8152664 | ---             | 12  | 0.53 | 0.39 | 4.57  | 3.55 | 6.9E-04 | 1.7E-03 | 9.17  |
| 8_60 | 8152759 | TATDN1          | 31  | 0.52 | 0.18 | 6.77  | 2.45 | 1.7E-02 | 3.0E-02 | 5.04  |
| 8_60 | 8152703 | FBXO32          | 39  | 0.50 | 0.74 | 7.73  | 3.31 | 1.5E-03 | 3.1E-03 | 8.33  |
| 8_60 | 8152666 | ---             | 8   | 0.49 | 0.30 | 5.48  | 3.37 | 1.2E-03 | 2.7E-03 | 8.53  |
| 8_60 | 8152642 | AY225521        | 6   | 0.35 | 0.22 | 6.20  | 3.01 | 3.7E-03 | 7.3E-03 | 7.09  |
| 8_60 | 8152626 | ---             | 16  | 0.34 | 0.19 | 5.12  | 2.31 | 2.4E-02 | 4.0E-02 | 4.64  |
| 8_60 | 8148194 | ENST00000390925 | 10  | 0.33 | 0.18 | 4.38  | 2.42 | 1.8E-02 | 3.2E-02 | 4.98  |
| 8_60 | 8148261 | ---             | 20  | 0.20 | 0.17 | 5.07  | 2.62 | 1.1E-02 | 2.0E-02 | 5.62  |
| 8_6  | 8146564 | RAB2A           | 76  | 0.65 | 0.80 | 8.55  | 4.15 | 8.4E-05 | 1.7E-04 | 12.55 |
| 8_59 | 8152617 | HAS2            | 36  | 0.27 | -    | 6.35  | -    | -       | 3.4E-02 | 4.90  |
| 8_56 | 8152553 | TA2F            | 61  | 0.62 | 0.49 | 7.66  | 3.50 | 8.4E-04 | 4.8E-03 | 7.71  |
| 8_56 | 8152597 | MRPL13          | 28  | 0.56 | 0.31 | 5.01  | 3.22 | 2.0E-03 | 8.5E-03 | 6.88  |
| 8_56 | 8148124 | MTBP            | 45  | 0.54 | 0.66 | 5.69  | 4.04 | 1.4E-04 | 1.2E-03 | 9.73  |
| 8_56 | 8152506 | SAMD12          | 221 | 0.53 | 0.56 | 6.66  | 3.05 | 3.3E-03 | 1.1E-02 | 6.48  |
| 8_56 | 8152582 | DCC1            | 20  | 0.52 | 0.55 | 5.82  | 4.24 | 7.1E-05 | 1.2E-03 | 9.73  |
| 8_56 | 8148040 | MAL2            | 43  | 0.49 | 0.75 | 9.97  | 2.98 | 4.0E-03 | 1.1E-02 | 6.47  |
| 8_55 | 8152491 | EXT1            | 256 | 0.58 | -    | 7.70  | -    | -       | 4.8E-05 | 14.33 |
| 8_54 | 8147994 | C8orf53         | 29  | 0.72 | 0.45 | 6.85  | 3.97 | 1.7E-04 | 6.3E-04 | 10.64 |
| 8_54 | 8148022 | MED30           | 37  | 0.66 | 0.19 | 5.21  | 3.92 | 2.1E-04 | 6.3E-04 | 10.64 |
| 8_54 | 8152477 | RAD21           | 18  | 0.60 | 0.71 | 9.00  | 4.24 | 7.0E-05 | 6.3E-04 | 10.64 |
| 8_54 | 8152491 | EXT1            | 256 | 0.58 | 0.39 | 7.70  | 3.22 | 2.0E-03 | 4.0E-03 | 7.96  |
| 8_54 | 8152465 | EIF3H           | 73  | 0.57 | 0.38 | 8.90  | 2.85 | 5.7E-03 | 8.6E-03 | 6.86  |
| 8_54 | 8148000 | ENST00000378279 | 19  | 0.47 | 0.23 | 6.18  | 3.18 | 2.2E-03 | 4.0E-03 | 7.96  |
| 8_54 | 8148003 | SLC30A8         | 159 | 0.29 | 0.23 | 5.58  | 2.55 | 1.3E-02 | 1.7E-02 | 5.89  |
| 8_54 | 8148018 | ---             | 13  | 0.19 | 0.20 | 5.79  | 2.49 | 1.5E-02 | 1.7E-02 | 5.86  |
| 8_52 | 8152453 | TRPS1           | 256 | 0.51 | 0.83 | 7.98  | 2.87 | 5.6E-03 | 2.2E-02 | 5.49  |
| 8_5  | 8146482 | TGS1            | 31  | 0.80 | 0.49 | 6.96  | 3.70 | 4.4E-04 | 3.3E-03 | 8.25  |
| 8_5  | 8150846 | TMEM68          | 26  | 0.78 | 0.51 | 6.28  | 3.47 | 9.0E-04 | 3.3E-03 | 8.25  |
| 8_5  | 8150866 | ---             | 10  | 0.73 | 0.22 | 5.40  | 2.42 | 1.8E-02 | 3.0E-02 | 5.06  |
| 8_5  | 8146475 | XKR4            | 380 | 0.63 | 0.30 | 6.87  | 3.44 | 9.8E-04 | 3.3E-03 | 8.25  |
| 8_5  | 8146468 | RP1             | 25  | 0.45 | 0.33 | 5.02  | 2.43 | 1.8E-02 | 3.0E-02 | 5.06  |
| 8_5  | 8150860 | ---             | 9   | 0.38 | 0.21 | 7.81  | 2.83 | 6.1E-03 | 1.5E-02 | 6.04  |
| 8_47 | 8152355 | GOLSYN          | 77  | 0.35 | -    | 6.83  | -    | -       | 9.5E-03 | 6.72  |
| 8_45 | 8147970 | EBAG9           | 25  | 0.73 | 0.68 | 6.83  | 6.42 | 1.8E-08 | 5.3E-08 | 24.17 |
| 8_45 | 8152355 | GOLSYN          | 77  | 0.35 | 0.32 | 6.83  | 2.67 | 9.5E-03 | 1.4E-02 | 6.13  |
| 8_43 | 8147864 | TTC35           | 46  | 0.62 | 0.61 | 7.61  | 3.81 | 3.1E-04 | 1.3E-03 | 9.54  |
| 8_43 | 8152340 | NUDCD1          | 55  | 0.62 | 0.58 | 6.94  | 3.90 | 2.3E-04 | 1.3E-03 | 9.54  |
| 8_43 | 8147883 | ENY2            | 16  | 0.62 | 0.62 | 7.76  | 4.30 | 5.7E-05 | 7.4E-04 | 10.39 |
| 8_43 | 8147848 | OXR1            | 157 | 0.58 | 0.61 | 7.01  | 3.48 | 8.8E-04 | 2.9E-03 | 8.45  |
| 8_42 | 8147848 | OXR1            | 157 | 0.58 | 0.51 | 7.01  | 2.84 | 6.0E-03 | 1.8E-02 | 5.80  |
| 8_39 | 8152096 | YWHAZ           | 23  | 0.70 | 0.60 | 9.86  | 4.91 | 6.2E-06 | 3.1E-04 | 11.67 |
| 8_39 | 8147697 | GRHL2           | 193 | 0.70 | 0.64 | 7.68  | 3.24 | 1.9E-03 | 5.8E-03 | 7.42  |
| 8_39 | 8152117 | ---             | 20  | 0.67 | 0.21 | 5.87  | 2.64 | 1.0E-02 | 2.5E-02 | 5.32  |
| 8_39 | 8152111 | ZNF706          | 21  | 0.65 | 0.35 | 7.51  | 4.22 | 7.6E-05 | 1.0E-03 | 9.94  |
| 8_39 | 8152148 | UBR5            | 64  | 0.64 | 0.58 | 8.60  | 4.19 | 8.4E-05 | 1.0E-03 | 9.94  |
| 8_39 | 8147724 | ATP6V1C1        | 50  | 0.62 | 0.71 | 7.71  | 4.11 | 1.1E-04 | 1.0E-03 | 9.94  |
| 8_39 | 8152222 | AZIN1           | 30  | 0.61 | 0.62 | 8.41  | 3.68 | 4.7E-04 | 2.6E-03 | 8.58  |
| 8_39 | 8147766 | FZD6            | 25  | 0.60 | 0.70 | 7.71  | 3.85 | 2.7E-04 | 1.7E-03 | 9.23  |
| 8_39 | 8152079 | PABPC1          | 17  | 0.58 | 0.59 | 11.30 | 3.86 | 2.6E-04 | 1.7E-03 | 9.23  |
| 8_39 | 8147785 | WDSOF1          | 31  | 0.57 | 0.40 | 7.69  | 4.52 | 2.6E-05 | 6.5E-04 | 10.59 |
| 8_39 | 8152255 | SLC25A32        | 19  | 0.57 | 0.42 | 7.69  | 3.38 | 1.2E-03 | 4.4E-03 | 7.84  |
| 8_39 | 8152280 | LRP12           | 50  | 0.54 | 0.39 | 6.21  | 2.61 | 1.1E-02 | 2.5E-02 | 5.32  |
| 8_39 | 8152090 | ENST00000386147 | 8   | 0.52 | 0.23 | 4.37  | 3.47 | 9.3E-04 | 3.9E-03 | 8.01  |
| 8_39 | 8147691 | ENST00000365490 | 14  | 0.51 | 0.23 | 5.74  | 3.24 | 1.9E-03 | 5.8E-03 | 7.42  |
| 8_39 | 8152119 | NCALD           | 332 | 0.46 | 0.53 | 7.39  | 2.72 | 8.4E-03 | 2.2E-02 | 5.50  |
| 8_39 | 8147721 | FLJ45248        | 16  | 0.45 | 0.26 | 6.12  | 4.08 | 1.2E-04 | 1.0E-03 | 9.94  |
| 8_39 | 8152133 | RRM2B           | 28  | 0.45 | 0.44 | 7.26  | 3.53 | 7.6E-04 | 3.5E-03 | 8.18  |
| 8_39 | 8147777 | CTHRC1          | 17  | 0.44 | 0.30 | 7.13  | 2.63 | 1.0E-02 | 2.5E-02 | 5.32  |
| 8_39 | 8147828 | ---             | 11  | 0.41 | 0.20 | 4.10  | 3.38 | 1.2E-03 | 4.4E-03 | 7.84  |
| 8_39 | 8152248 | ENST00000386036 | 14  | 0.40 | 0.25 | 4.48  | 3.10 | 2.8E-03 | 8.3E-03 | 6.92  |
| 8_39 | 8152211 | ---             | 14  | 0.40 | 0.48 | 4.91  | 2.80 | 6.6E-03 | 1.8E-02 | 5.77  |
| 8_39 | 8152062 | MGC39715        | 80  | 0.39 | 0.45 | 5.76  | 3.55 | 7.1E-04 | 3.5E-03 | 8.18  |
| 8_39 | 8147830 | TM7SF4          | 28  | 0.33 | 0.25 | 5.48  | 2.43 | 1.8E-02 | 3.9E-02 | 4.70  |
| 8_39 | 8152213 | ---             | 17  | 0.32 | 0.26 | 5.78  | 2.31 | 2.4E-02 | 4.7E-02 | 4.40  |
| 8_39 | 8147689 | ---             | 10  | 0.29 | 0.18 | 6.27  | 2.40 | 1.9E-02 | 4.0E-02 | 4.64  |
| 8_38 | 8152053 | ANKRD46         | 41  | 0.69 | 0.42 | 6.74  | 4.13 | 8.1E-05 | 1.6E-04 | 12.60 |
| 8_38 | 8152062 | MGC39715        | 80  | 0.39 | 0.47 | 5.76  | 3.83 | 2.4E-04 | 2.4E-04 | 12.03 |
| 8_37 | 8151993 | COX6C           | 15  | 0.64 | 0.72 | 8.87  | 4.95 | 5.3E-06 | 4.9E-05 | 14.32 |
| 8_37 | 8152041 | RNF19A          | 35  | 0.63 | 0.75 | 8.26  | 4.81 | 8.9E-06 | 4.9E-05 | 14.32 |
| 8_37 | 8147654 | POLR2K          | 8   | 0.53 | 0.63 | 7.78  | 4.38 | 4.2E-05 | 1.5E-04 | 12.67 |
| 8_37 | 8147580 | VPS13B          | 413 | 0.43 | 0.40 | 7.72  | 3.15 | 2.4E-03 | 5.4E-03 | 7.54  |
| 8_37 | 8152031 | FBXO43          | 13  | 0.35 | 0.23 | 5.22  | 3.16 | 2.3E-03 | 5.4E-03 | 7.54  |
| 8_37 | 8147650 | ---             | 11  | 0.24 | 0.18 | 4.45  | 2.50 | 1.5E-02 | 2.7E-02 | 5.21  |
| 8_36 | 8147548 | POP1            | 41  | 0.70 | 0.35 | 6.06  | 4.29 | 5.5E-05 | 3.0E-04 | 11.68 |
| 8_36 | 8151952 | NPAL2           | 80  | 0.57 | 0.66 | 6.68  | 4.30 | 5.5E-05 | 3.0E-04 | 11.68 |
| 8_36 | 8151967 | STK3            | 148 | 0.56 | 0.48 | 6.91  | 4.02 | 1.4E-04 | 5.3E-04 | 10.89 |
| 8_36 | 8151942 | HRSP12          | 22  | 0.50 | 0.47 | 6.88  | 3.10 | 2.8E-03 | 6.2E-03 | 7.34  |
| 8_36 | 8147580 | VPS13B          | 413 | 0.43 | 0.40 | 7.72  | 3.18 | 2.2E-03 | 6.0E-03 | 7.38  |
| 8_36 | 8151989 | ---             | 7   | 0.38 | 0.21 | 5.17  | 2.86 | 5.5E-03 | 8.7E-03 | 6.84  |
| 8_36 | 8147543 | ENST00000318528 | 39  | 0.27 | 0.22 | 6.20  | 2.74 | 7.8E-03 | 1.1E-02 | 6.54  |
| 8_36 | 8147566 | KCNS2           | 19  | 0.25 | 0.15 | 7.04  | 2.28 | 2.6E-02 | 3.1E-02 | 4.99  |

|      |         |                 |     |       |      |       |      |         |         |       |
|------|---------|-----------------|-----|-------|------|-------|------|---------|---------|-------|
| 8_36 | 8147573 | OSR2            | 8   | 0.23  | 0.26 | 6.41  | 2.89 | 5.2E-03 | 8.7E-03 | 6.84  |
| 8_34 | 8147483 | MTDH            | 46  | 0.72  | 0.66 | 8.64  | 5.49 | 6.9E-07 | 5.5E-06 | 17.47 |
| 8_34 | 8147503 | LAPTM4B         | 87  | 0.57  | 0.74 | 9.10  | 3.22 | 2.0E-03 | 3.3E-03 | 8.24  |
| 8_34 | 8151935 | RPL30           | 10  | 0.42  | 0.48 | 10.92 | 3.30 | 1.6E-03 | 3.3E-03 | 8.24  |
| 8_34 | 8147516 | MATN2           | 117 | 0.39  | 0.59 | 7.20  | 3.17 | 2.3E-03 | 3.3E-03 | 8.24  |
| 8_34 | 8147541 | ---             | 7   | 0.30  | 0.17 | 4.56  | 3.25 | 1.8E-03 | 3.3E-03 | 8.24  |
| 8_34 | 8147543 | ENST00000318528 | 39  | 0.27  | 0.22 | 6.20  | 2.78 | 7.1E-03 | 8.1E-03 | 6.95  |
| 8_34 | 8147501 | ---             | 7   | 0.24  | 0.26 | 4.64  | 3.15 | 2.5E-03 | 3.3E-03 | 8.24  |
| 8_33 | 8151842 | KIAA1429        | 72  | 0.70  | 0.43 | 7.33  | 3.16 | 2.3E-03 | 8.3E-03 | 6.92  |
| 8_33 | 8151909 | UQCRB           | 15  | 0.69  | 0.41 | 5.53  | 4.45 | 3.3E-05 | 1.1E-03 | 9.89  |
| 8_33 | 8151917 | MTERFD1         | 21  | 0.68  | 0.46 | 6.31  | 3.83 | 2.8E-04 | 2.2E-03 | 8.80  |
| 8_33 | 8147424 | C8orf38         | 67  | 0.65  | 0.36 | 6.27  | 3.84 | 2.8E-04 | 2.2E-03 | 8.80  |
| 8_33 | 8147447 | PTDSS1          | 64  | 0.62  | 0.57 | 8.03  | 3.47 | 9.0E-04 | 3.6E-03 | 8.12  |
| 8_33 | 8147351 | RBM35A          | 57  | 0.62  | 0.65 | 8.99  | 2.99 | 3.9E-03 | 1.1E-02 | 6.48  |
| 8_33 | 8147439 | PLEKHF2         | 24  | 0.57  | 0.62 | 6.71  | 3.62 | 5.6E-04 | 2.8E-03 | 8.46  |
| 8_33 | 8151788 | RBM12B          | 13  | 0.56  | 0.29 | 7.48  | 2.46 | 1.6E-02 | 3.3E-02 | 4.93  |
| 8_33 | 8147373 | BC071775        | 20  | 0.54  | 0.49 | 6.06  | 3.59 | 6.2E-04 | 2.8E-03 | 8.46  |
| 8_33 | 8147396 | INTS8           | 35  | 0.54  | 0.41 | 6.92  | 3.00 | 3.8E-03 | 1.1E-02 | 6.48  |
| 8_33 | 8151890 | TP53INP1        | 33  | 0.52  | 0.62 | 8.07  | 4.06 | 1.3E-04 | 2.0E-03 | 8.93  |
| 8_33 | 8147344 | PPM2C           | 18  | 0.52  | 0.29 | 8.22  | 2.29 | 2.5E-02 | 4.7E-02 | 4.41  |
| 8_33 | 8147371 | ---             | 8   | 0.48  | 0.27 | 6.51  | 3.71 | 4.3E-04 | 2.7E-03 | 8.52  |
| 8_33 | 8151931 | TSPYL5          | 21  | 0.42  | 0.57 | 7.03  | 2.91 | 4.9E-03 | 1.3E-02 | 6.27  |
| 8_33 | 8151888 | ---             | 14  | 0.36  | 0.33 | 4.99  | 2.59 | 1.2E-02 | 2.7E-02 | 5.20  |
| 8_33 | 8151927 | ---             | 16  | 0.35  | 0.33 | 6.14  | 2.68 | 9.3E-03 | 2.3E-02 | 5.44  |
| 8_33 | 8151816 | GEM             | 34  | 0.22  | 0.25 | 6.45  | 2.50 | 1.5E-02 | 3.2E-02 | 4.98  |
| 8_31 | 8147262 | OTUD6B          | 18  | 0.60  | 0.43 | 7.17  | 4.12 | 1.1E-04 | 1.2E-03 | 9.74  |
| 8_31 | 8151711 | NBN             | 52  | 0.57  | 0.51 | 7.40  | 3.29 | 1.6E-03 | 8.0E-03 | 6.97  |
| 8_31 | 8151756 | TMEM55A         | 29  | 0.46  | 0.34 | 6.17  | 3.34 | 1.4E-03 | 8.0E-03 | 6.97  |
| 8_31 | 8151747 | TMEM64          | 119 | 0.41  | 0.23 | 7.05  | 2.63 | 1.1E-02 | 3.0E-02 | 5.06  |
| 8_31 | 8147273 | SLC26A7         | 185 | 0.40  | 0.57 | 5.32  | 3.11 | 2.7E-03 | 1.1E-02 | 6.52  |
| 8_31 | 8147242 | ---             | 6   | 0.35  | 0.40 | 4.87  | 4.09 | 1.2E-04 | 1.2E-03 | 9.74  |
| 8_31 | 8151768 | RUNX1T1         | 172 | 0.27  | 0.28 | 5.38  | 2.78 | 7.0E-03 | 2.3E-02 | 5.42  |
| 8_30 | 8147172 | CPNE3           | 51  | 0.66  | 0.69 | 7.97  | 4.18 | 8.3E-05 | 2.8E-04 | 11.82 |
| 8_30 | 8151644 | FAM82B          | 21  | 0.62  | 0.48 | 6.49  | 4.34 | 4.7E-05 | 2.3E-04 | 12.06 |
| 8_30 | 8147156 | WWP1            | 43  | 0.61  | 0.47 | 8.15  | 4.57 | 2.0E-05 | 2.0E-04 | 12.28 |
| 8_30 | 8151659 | CNGB3           | 131 | 0.38  | 0.17 | 4.97  | 2.58 | 1.2E-02 | 2.4E-02 | 5.37  |
| 8_30 | 8151679 | WDR21C          | 10  | 0.37  | 0.30 | 6.03  | 3.74 | 3.8E-04 | 9.4E-04 | 10.05 |
| 8_27 | 8151613 | ENST00000379003 | 0   | #N/A  | 0.54 | 10.70 | 2.71 | 8.5E-03 | 1.4E-02 | 6.21  |
| 8_27 | 8151621 | ENST00000379010 | 0   | #N/A  | 0.54 | 10.70 | 2.71 | 8.5E-03 | 1.4E-02 | 6.21  |
| 8_27 | 8151609 | REXO1L1         | 0   | #N/A  | 0.55 | 9.75  | 3.15 | 2.4E-03 | 6.4E-03 | 7.28  |
| 8_27 | 8151623 | REXO1L2P        | 0   | #N/A  | 0.54 | 9.87  | 3.30 | 1.6E-03 | 4.8E-03 | 7.71  |
| 8_27 | 8151587 | C8orf59         | 9   | 0.48  | 0.57 | 6.50  | 4.76 | 1.1E-05 | 2.6E-04 | 11.92 |
| 8_27 | 8147101 | E2F5            | 25  | 0.45  | 0.40 | 6.94  | 2.42 | 1.8E-02 | 2.7E-02 | 5.21  |
| 8_27 | 8151631 | ENST00000378995 | 20  | 0.38  | 0.56 | 9.81  | 3.34 | 1.4E-03 | 4.8E-03 | 7.71  |
| 8_27 | 8151603 | REXO1L2P        | 7   | 0.36  | 0.54 | 9.87  | 3.30 | 1.6E-03 | 4.8E-03 | 7.71  |
| 8_27 | 8151629 | ENST00000379010 | 18  | 0.27  | 0.59 | 10.57 | 2.76 | 7.5E-03 | 1.4E-02 | 6.21  |
| 8_27 | 8151617 | ENST00000379003 | 1   | 0.04  | 0.54 | 10.70 | 2.71 | 8.5E-03 | 1.4E-02 | 6.21  |
| 8_27 | 8151619 | REXO1L2P        | 1   | 0.01  | 0.55 | 9.91  | 3.29 | 1.6E-03 | 4.8E-03 | 7.71  |
| 8_27 | 8151615 | REXO1L2P        | 1   | 0.00  | 0.55 | 9.80  | 3.31 | 1.5E-03 | 4.8E-03 | 7.71  |
| 8_27 | 8151605 | ENST00000379006 | 1   | -0.01 | 0.54 | 10.70 | 2.71 | 8.5E-03 | 1.4E-02 | 6.21  |
| 8_27 | 8151607 | REXO1L2P        | 1   | -0.06 | 0.54 | 9.87  | 3.30 | 1.6E-03 | 4.8E-03 | 7.71  |
| 8_27 | 8151627 | REXO1L2P        | 3   | -0.14 | 0.57 | 9.87  | 3.32 | 1.5E-03 | 4.8E-03 | 7.71  |
| 8_27 | 8151625 | ENST00000379006 | 3   | -0.19 | 0.54 | 10.70 | 2.71 | 8.5E-03 | 1.4E-02 | 6.21  |
| 8_25 | 8147057 | CHMP4C          | 25  | 0.58  | 0.31 | 7.11  | 3.73 | 4.0E-04 | 9.9E-03 | 6.65  |
| 8_25 | 8151561 | ZFAND1          | 15  | 0.54  | 0.36 | 7.97  | 2.53 | 1.4E-02 | 4.3E-02 | 4.55  |
| 8_25 | 8151496 | ZNF704          | 119 | 0.54  | 0.55 | 7.67  | 3.36 | 1.3E-03 | 1.6E-02 | 5.95  |
| 8_25 | 8151542 | ENST00000360464 | 16  | 0.44  | 0.15 | 4.19  | 2.41 | 1.9E-02 | 5.0E-02 | 4.33  |
| 8_25 | 8151508 | ENST00000391127 | 7   | 0.43  | 0.19 | 5.18  | 2.55 | 1.3E-02 | 4.3E-02 | 4.55  |
| 8_25 | 8147040 | ZBTB10          | 23  | 0.42  | 0.40 | 7.76  | 3.11 | 2.7E-03 | 2.2E-02 | 5.48  |
| 8_25 | 8151490 | ENST00000383922 | 12  | 0.42  | 0.13 | 3.17  | 2.67 | 9.5E-03 | 4.3E-02 | 4.55  |
| 8_25 | 8151572 | SNX16           | 25  | 0.42  | 0.45 | 5.46  | 3.01 | 3.6E-03 | 2.3E-02 | 5.47  |
| 8_25 | 8147038 | ---             | 12  | 0.38  | 0.21 | 4.81  | 2.39 | 2.0E-02 | 5.0E-02 | 4.33  |
| 8_25 | 8151492 | ---             | 15  | 0.33  | 0.15 | 4.86  | 2.63 | 1.0E-02 | 4.3E-02 | 4.55  |
| 8_21 | 8146930 | TMEM70          | 20  | 0.64  | 0.26 | 6.61  | 3.91 | 2.2E-04 | 2.7E-03 | 8.53  |
| 8_21 | 8151384 | STAU2           | 212 | 0.64  | 0.39 | 6.88  | 3.79 | 3.2E-04 | 2.7E-03 | 8.53  |
| 8_21 | 8151401 | UBE2W           | 56  | 0.50  | 0.35 | 7.16  | 2.73 | 8.0E-03 | 3.2E-02 | 4.98  |
| 8_21 | 8151436 | PXMP3           | 18  | 0.47  | 0.43 | 6.32  | 3.80 | 3.1E-04 | 2.7E-03 | 8.53  |
| 8_21 | 8151413 | TCEB1           | 28  | 0.47  | 0.17 | 7.00  | 2.64 | 1.0E-02 | 3.2E-02 | 4.96  |
| 8_21 | 8146914 | TERF1           | 38  | 0.45  | 0.38 | 8.07  | 2.89 | 5.2E-03 | 3.2E-02 | 4.98  |
| 8_21 | 8146943 | ---             | 11  | 0.40  | 0.32 | 5.21  | 2.71 | 8.6E-03 | 3.2E-02 | 4.98  |
| 8_21 | 8151432 | ENST00000388687 | 15  | 0.25  | 0.34 | 6.08  | 2.69 | 8.9E-03 | 3.2E-02 | 4.98  |
| 8_20 | 8146908 | KCNB2           | 357 | 0.57  | -    | 6.14  | -    | -       | 7.0E-03 | 7.16  |
| 8_2  | 8150844 | ENST00000297317 | 16  | 0.68  | -    | 6.90  | -    | -       | 1.6E-03 | 9.26  |
| 8_19 | 8151254 | NCOA2           | 144 | 0.63  | 0.52 | 8.04  | 4.14 | 9.6E-05 | 1.1E-03 | 9.89  |
| 8_19 | 8146908 | KCNB2           | 357 | 0.57  | 0.42 | 6.14  | 4.89 | 6.2E-06 | 1.4E-04 | 12.83 |
| 8_19 | 8151252 | ENST00000334932 | 14  | 0.48  | 0.26 | 6.33  | 3.72 | 4.1E-04 | 3.0E-03 | 8.39  |
| 8_19 | 8151334 | MSC             | 25  | 0.47  | 0.19 | 6.48  | 2.82 | 6.2E-03 | 1.9E-02 | 5.69  |
| 8_19 | 8151308 | ---             | 8   | 0.45  | 0.13 | 4.14  | 2.39 | 2.0E-02 | 4.8E-02 | 4.37  |
| 8_19 | 8151341 | TRPA1           | 69  | 0.43  | 0.25 | 4.80  | 3.28 | 1.6E-03 | 7.1E-03 | 7.14  |
| 8_19 | 8151281 | TRAM1           | 28  | 0.43  | 0.39 | 9.45  | 3.02 | 3.5E-03 | 1.3E-02 | 6.28  |
| 8_19 | 8151238 | ---             | 11  | 0.41  | 0.35 | 5.94  | 3.54 | 7.3E-04 | 4.0E-03 | 7.97  |
| 8_19 | 8151236 | ---             | 16  | 0.32  | 0.23 | 5.65  | 2.62 | 1.1E-02 | 3.0E-02 | 5.08  |
| 8_17 | 8151149 | ARFGEF1         | 54  | 0.63  | 0.53 | 8.04  | 3.81 | 3.1E-04 | 5.2E-03 | 7.58  |
| 8_16 | 8151149 | ARFGEF1         | 54  | 0.63  | 0.52 | 8.06  | 3.78 | 3.3E-04 | 1.0E-03 | 9.97  |
| 8_16 | 8151136 | COP5            | 18  | 0.63  | 0.53 | 6.90  | 4.73 | 1.2E-05 | 7.0E-05 | 13.80 |
| 8_16 | 8146756 | CSPP1           | 53  | 0.48  | 0.54 | 6.70  | 3.09 | 2.9E-03 | 5.8E-03 | 7.42  |
| 8_16 | 8146754 | ---             | 4   | 0.48  | 0.23 | 4.59  | 2.89 | 5.2E-03 | 6.2E-03 | 7.34  |
| 8_16 | 8151127 | ENST00000324682 | 30  | 0.43  | 0.31 | 3.86  | 2.97 | 4.1E-03 | 6.1E-03 | 7.35  |
| 8_16 | 8146788 | ---             | 9   | 0.37  | 0.42 | 6.33  | 2.42 | 1.8E-02 | 1.8E-02 | 5.79  |
| 8_15 | 8151118 | VCPIP1          | 13  | 0.73  | 0.39 | 8.09  | 4.69 | 1.4E-05 | 1.5E-04 | 12.74 |
| 8_15 | 8151066 | ARMC1           | 20  | 0.65  | 0.62 | 7.12  | 4.69 | 1.4E-05 | 1.5E-04 | 12.74 |
| 8_15 | 8146711 | C8orf44         | 14  | 0.63  | 0.55 | 6.07  | 4.29 | 5.9E-05 | 4.1E-04 | 11.25 |
| 8_15 | 8146685 | RRS1            | 12  | 0.62  | 0.44 | 7.25  | 3.90 | 2.2E-04 | 1.2E-03 | 9.73  |
| 8_15 | 8146649 | MTRF1           | 31  | 0.54  | 0.39 | 7.57  | 2.78 | 7.1E-03 | 1.4E-02 | 6.21  |
| 8_15 | 8146647 | ---             | 13  | 0.53  | 0.43 | 4.31  | 3.46 | 9.4E-04 | 2.2E-03 | 8.84  |
| 8_15 | 8151090 | ---             | 9   | 0.50  | 0.33 | 5.29  | 3.76 | 3.5E-04 | 1.2E-03 | 9.71  |
| 8_15 | 8146717 | SGK3            | 70  | 0.50  | 0.39 | 6.34  | 3.70 | 4.3E-04 | 1.2E-03 | 9.71  |
| 8_15 | 8146738 | C8orf45         | 19  | 0.50  | 0.35 | 5.06  | 3.69 | 4.5E-04 | 1.2E-03 | 9.71  |
| 8_15 | 8146687 | ADHFE1          | 38  | 0.49  | 0.39 | 6.15  | 3.03 | 3.5E-03 | 7.3E-03 | 7.09  |
| 8_15 | 8151101 | MYBL1           | 25  | 0.45  | 0.72 | 5.43  | 3.69 | 4.5E-04 | 1.2E-03 | 9.71  |
| 8_15 | 8151127 | ENST00000324682 | 30  | 0.43  | 0.25 | 3.86  | 2.46 | 1.6E-02 | 2.6E-02 | 5.24  |
| 8_15 | 8146703 | C8orf46         | 23  | 0.39  | 0.19 | 6.14  | 2.66 | 9.9E-03 | 1.7E-02 | 5.86  |
| 8_15 | 8151092 | CRH             | 22  | 0.37  | 0.19 | 5.09  | 2.30 | 2.5E-02 | 3.7E-02 | 4.76  |
| 8_13 | 8146618 | RLBP1L1         | 167 | 0.75  | 0.52 | 6.18  | 4.17 | 9.0E-05 | 1.3E-03 | 9.63  |
| 8_13 | 8146637 | YTHDF3          | 22  | 0.66  | 0.60 | 7.38  | 3.73 | 4.0E-04 | 2.8E-03 | 8.48  |
| 8_13 | 8146633 | AK127279        | 15  | 0.46  | 0.33 | 6.52  | 2.79 | 6.9E-03 | 3.2E-02 | 4.95  |

|      |         |                 |     |       |       |       |       |         |         |       |
|------|---------|-----------------|-----|-------|-------|-------|-------|---------|---------|-------|
| 8_11 | 8146618 | RLBP1L1         | 167 | 0.75  | -     | 6.18  | -     | -       | 1.3E-03 | 9.58  |
| 8_1  | 8150797 | ATP6V1H         | 68  | 0.79  | 0.72  | 7.47  | 5.82  | 1.3E-07 | 2.0E-06 | 18.97 |
| 8_1  | 8150818 | TCEA1           | 39  | 0.74  | 0.53  | 8.60  | 5.30  | 1.1E-06 | 5.4E-06 | 17.50 |
| 8_1  | 8146448 | MRPL15          | 15  | 0.70  | 0.75  | 7.45  | 5.37  | 8.2E-07 | 5.4E-06 | 17.50 |
| 8_1  | 8146435 | RG20            | 63  | 0.68  | 0.31  | 5.87  | 3.49  | 8.0E-04 | 2.0E-03 | 8.97  |
| 8_1  | 8150757 | RB1CC1          | 58  | 0.66  | 0.60  | 7.25  | 4.40  | 3.4E-05 | 1.0E-04 | 13.24 |
| 8_1  | 8146456 | ---             | 9   | 0.66  | 0.28  | 6.41  | 2.72  | 8.1E-03 | 1.5E-02 | 6.04  |
| 8_1  | 8150830 | LYPLA1          | 26  | 0.58  | 0.64  | 7.62  | 4.60  | 1.6E-05 | 6.1E-05 | 14.00 |
| 8_1  | 8146458 | ---             | 19  | 0.55  | 0.28  | 4.81  | 2.64  | 1.0E-02 | 1.7E-02 | 5.88  |
| 8_1  | 8150751 | UNQ9433         | 26  | 0.50  | 0.19  | 5.58  | 2.32  | 2.3E-02 | 3.1E-02 | 5.00  |
| 8_1  | 8146429 | NPBWR1          | 13  | 0.47  | 0.26  | 6.34  | 3.14  | 2.4E-03 | 5.2E-03 | 7.59  |
| 8_1  | 8146462 | SOX17           | 28  | 0.17  | 0.33  | 8.67  | 2.58  | 1.2E-02 | 1.8E-02 | 5.81  |
| 7_1  | 8136662 | MGAM            | 168 | 0.61  | -     | 5.68  | -     | -       | 1.4E-02 | 6.11  |
| 3_9  | 8091941 | PDCD10          | 33  | 0.64  | 0.66  | 6.54  | 5.49  | 4.1E-08 | 8.2E-08 | 23.55 |
| 3_9  | 8083779 | SERPIN1         | 62  | 0.27  | 0.24  | 5.03  | 2.02  | 4.3E-02 | 4.3E-02 | 4.54  |
| 3_8  | 8091941 | PDCD10          | 33  | 0.64  | 0.72  | 6.54  | 6.00  | 7.2E-08 | 1.5E-07 | 22.72 |
| 3_7  | 8083757 | NMD3            | 22  | 0.62  | 0.45  | 8.70  | 3.62  | 5.7E-04 | 4.7E-03 | 7.73  |
| 3_7  | 8091764 | KPNA4           | 43  | 0.55  | 0.62  | 7.08  | 4.63  | 1.7E-05 | 5.7E-04 | 10.79 |
| 3_7  | 8083709 | SMC4            | 24  | 0.53  | 0.72  | 7.82  | 3.93  | 2.0E-04 | 3.0E-03 | 8.37  |
| 3_7  | 8091780 | B3GALNT1        | 20  | 0.44  | 0.48  | 7.03  | 3.84  | 2.8E-04 | 3.0E-03 | 8.37  |
| 3_7  | 8083707 | ENST00000326474 | 7   | 0.43  | 0.15  | 5.21  | 3.12  | 2.7E-03 | 1.5E-02 | 6.09  |
| 3_7  | 8091757 | TRIM59          | 13  | 0.32  | 0.43  | 6.09  | 3.18  | 2.3E-03 | 1.5E-02 | 6.09  |
| 3_7  | 8091737 | IFT80           | 63  | 0.32  | 0.38  | 7.53  | 2.84  | 5.9E-03 | 2.4E-02 | 5.36  |
| 3_7  | 8091806 | hCG_16001       | 13  | -0.22 | -0.34 | 9.74  | -2.90 | 5.0E-03 | 2.4E-02 | 5.40  |
| 3_5  | 8083690 | IL12A           | 32  | 0.39  | 0.20  | 5.67  | 2.16  | 3.4E-02 | 4.5E-02 | 4.47  |
| 3_5  | 8091733 | ---             | 13  | 0.25  | 0.15  | 4.29  | 2.39  | 1.9E-02 | 3.8E-02 | 4.70  |
| 3_5  | 8083677 | SCHIP1          | 381 | 0.22  | 0.21  | 6.50  | 2.45  | 1.6E-02 | 3.8E-02 | 4.70  |
| 3_4  | 8083656 | MFS1            | 28  | 0.49  | 0.84  | 8.01  | 4.56  | 2.2E-05 | 8.8E-05 | 13.47 |
| 3_4  | 8083677 | SCHIP1          | 381 | 0.22  | 0.20  | 6.50  | 2.43  | 1.8E-02 | 3.6E-02 | 4.80  |
| 3_3  | 8083652 | AY070437        | 18  | 0.43  | 0.36  | 6.08  | 3.64  | 5.3E-04 | 1.1E-03 | 9.88  |
| 3_3  | 8091723 | RARRES1         | 42  | 0.31  | 0.53  | 6.40  | 2.17  | 3.3E-02 | 3.3E-02 | 4.91  |
| 3_28 | 8084947 | FBXO45          | 23  | 0.80  | 0.89  | 6.58  | 8.34  | 4.3E-12 | 1.7E-10 | 32.49 |
| 3_28 | 8093230 | KIAA0226        | 37  | 0.80  | 0.53  | 7.75  | 5.64  | 3.3E-07 | 1.7E-06 | 19.17 |
| 3_28 | 8084971 | SEN5            | 42  | 0.79  | 0.80  | 7.93  | 6.87  | 2.1E-09 | 2.4E-08 | 25.32 |
| 3_28 | 8093156 | NCBP2           | 24  | 0.78  | 0.79  | 7.82  | 8.00  | 1.8E-11 | 4.6E-10 | 31.02 |
| 3_28 | 8084982 | ENST00000319735 | 18  | 0.76  | 0.47  | 6.72  | 6.55  | 8.1E-09 | 7.9E-08 | 23.59 |
| 3_28 | 8093130 | RNF168          | 31  | 0.76  | 0.70  | 7.11  | 7.25  | 4.3E-10 | 5.6E-09 | 27.42 |
| 3_28 | 8093141 | WDR53           | 18  | 0.75  | 0.53  | 6.61  | 8.53  | 1.9E-12 | 1.5E-10 | 32.65 |
| 3_28 | 8092905 | LSG1            | 37  | 0.73  | 0.77  | 7.71  | 7.79  | 4.3E-11 | 8.4E-10 | 30.15 |
| 3_28 | 8084986 | FYTTD1          | 24  | 0.68  | 0.83  | 7.91  | 6.24  | 2.9E-08 | 2.1E-07 | 22.21 |
| 3_28 | 8093191 | DLG1            | 146 | 0.65  | 0.67  | 8.39  | 5.36  | 1.0E-06 | 4.9E-06 | 17.64 |
| 3_28 | 8093112 | UBXD7           | 44  | 0.64  | 0.70  | 8.23  | 5.75  | 2.2E-07 | 1.4E-06 | 19.44 |
| 3_28 | 8093086 | PCYT1A          | 37  | 0.63  | 0.57  | 6.99  | 5.71  | 2.5E-07 | 1.5E-06 | 19.34 |
| 3_28 | 8084955 | PIGX            | 17  | 0.63  | 0.90  | 6.30  | 7.34  | 2.9E-10 | 4.5E-09 | 27.72 |
| 3_28 | 8092849 | ATP13A3         | 41  | 0.61  | 0.75  | 8.54  | 5.65  | 3.3E-07 | 1.7E-06 | 19.17 |
| 3_28 | 8085033 | MLLN            | 49  | 0.60  | 0.44  | 6.60  | 4.34  | 4.6E-05 | 1.6E-04 | 12.63 |
| 3_28 | 8092922 | C3orf21         | 126 | 0.57  | 0.24  | 7.47  | 4.01  | 1.5E-04 | 4.6E-04 | 11.07 |
| 3_28 | 8084844 | OPA1            | 81  | 0.57  | 0.72  | 8.11  | 6.25  | 2.8E-08 | 2.1E-07 | 22.21 |
| 3_28 | 8084895 | MUC20           | 54  | 0.56  | 0.65  | 7.30  | 4.54  | 2.3E-05 | 8.5E-05 | 13.52 |
| 3_28 | 8093013 | TNK2            | 24  | 0.55  | 0.22  | 7.42  | 3.03  | 3.4E-03 | 8.4E-03 | 6.90  |
| 3_28 | 8084963 | PAK2            | 49  | 0.54  | 0.82  | 7.62  | 5.10  | 2.8E-06 | 1.3E-05 | 16.24 |
| 3_28 | 8085026 | RPL35A          | 15  | 0.53  | 0.54  | 10.30 | 4.90  | 5.9E-06 | 2.6E-05 | 15.24 |
| 3_28 | 8085000 | LRCH3           | 55  | 0.53  | 0.32  | 7.41  | 3.37  | 1.2E-03 | 3.2E-03 | 8.30  |
| 3_28 | 8093053 | TFRC            | 31  | 0.51  | 1.03  | 8.59  | 4.83  | 7.8E-06 | 3.2E-05 | 14.93 |
| 3_28 | 8084838 | HRASLS          | 30  | 0.49  | 0.33  | 6.37  | 3.71  | 4.1E-04 | 1.2E-03 | 9.74  |
| 3_28 | 8093145 | ENST00000311566 | 11  | 0.48  | 0.37  | 5.42  | 4.76  | 1.0E-05 | 4.0E-05 | 14.61 |
| 3_28 | 8093219 | BDH1            | 44  | 0.48  | 0.31  | 6.66  | 3.48  | 8.6E-04 | 2.3E-03 | 8.75  |
| 3_28 | 8092888 | TMEM44          | 39  | 0.46  | 0.16  | 6.95  | 2.99  | 3.8E-03 | 8.8E-03 | 6.83  |
| 3_28 | 8092959 | PPP1R2          | 17  | 0.46  | 0.33  | 7.45  | 4.14  | 9.6E-05 | 3.1E-04 | 11.64 |
| 3_28 | 8084904 | MUC20           | 4   | 0.46  | 0.45  | 9.80  | 4.00  | 1.6E-04 | 4.7E-04 | 11.06 |
| 3_28 | 8093039 | SDHA            | 9   | 0.45  | 0.34  | 9.52  | 3.02  | 3.6E-03 | 8.4E-03 | 6.89  |
| 3_28 | 8092765 | ENST00000315470 | 116 | 0.44  | 0.44  | 7.07  | 4.36  | 4.3E-05 | 1.5E-04 | 12.68 |
| 3_28 | 8092933 | CENTB2          | 70  | 0.40  | 0.74  | 8.17  | 6.26  | 2.6E-08 | 2.1E-07 | 22.21 |
| 3_28 | 8084891 | FAM43A          | 18  | 0.39  | 0.27  | 7.14  | 3.04  | 3.4E-03 | 8.4E-03 | 6.90  |
| 3_28 | 8092957 | ---             | 4   | 0.37  | 0.25  | 6.28  | 2.73  | 8.1E-03 | 1.7E-02 | 5.84  |
| 3_28 | 8084923 | FLJ25996        | 14  | 0.35  | 0.22  | 5.53  | 2.81  | 6.5E-03 | 1.4E-02 | 6.12  |
| 3_28 | 8084878 | ---             | 4   | 0.30  | 0.59  | 5.67  | 3.64  | 5.2E-04 | 1.5E-03 | 9.42  |
| 3_27 | 8092750 | FGF12           | 143 | 0.27  | 0.24  | 5.81  | 2.35  | 2.0E-02 | 4.1E-02 | 4.63  |
| 3_25 | 8084742 | LPP             | 506 | 0.55  | 0.29  | 8.45  | 3.04  | 3.0E-03 | 6.0E-03 | 7.39  |
| 3_25 | 8084739 | FLJ42393        | 21  | 0.48  | 0.17  | 6.70  | 2.05  | 4.3E-02 | 4.3E-02 | 4.54  |
| 3_24 | 8092640 | RFC4            | 22  | 0.74  | 0.77  | 7.68  | 6.62  | 6.8E-09 | 1.6E-07 | 22.54 |
| 3_24 | 8092654 | RPL39L          | 26  | 0.73  | 0.71  | 6.64  | 5.55  | 5.1E-07 | 6.2E-06 | 17.31 |
| 3_24 | 8084634 | DNAJB11         | 23  | 0.66  | 0.66  | 8.26  | 5.26  | 1.6E-06 | 1.3E-05 | 16.25 |
| 3_24 | 8092691 | BCL6            | 29  | 0.48  | 0.37  | 7.47  | 2.44  | 1.7E-02 | 4.6E-02 | 4.44  |
| 3_24 | 8092627 | TBCCD1          | 25  | 0.47  | 0.29  | 6.77  | 3.64  | 5.3E-04 | 2.1E-03 | 8.89  |
| 3_24 | 8084717 | ST6GAL1         | 150 | 0.42  | 0.58  | 8.24  | 2.50  | 1.5E-02 | 4.5E-02 | 4.48  |
| 3_24 | 8084732 | RTP4            | 18  | 0.41  | 0.40  | 6.55  | 2.38  | 2.0E-02 | 4.8E-02 | 4.37  |
| 3_24 | 8084694 | EIF4A2          | 20  | 0.40  | 0.49  | 9.76  | 3.84  | 2.7E-04 | 1.6E-03 | 9.28  |
| 3_24 | 8084704 | ENST00000363548 | 14  | 0.37  | 0.56  | 6.15  | 3.66  | 4.9E-04 | 2.1E-03 | 8.89  |
| 3_24 | 8084708 | SNORA4          | 15  | 0.29  | 0.45  | 7.02  | 2.64  | 1.0E-02 | 3.5E-02 | 4.85  |
| 3_22 | 8092534 | TMEM41A         | 14  | 0.77  | 0.82  | 8.05  | 6.97  | 1.4E-09 | 1.1E-08 | 26.40 |
| 3_22 | 8084607 | SEN2            | 29  | 0.70  | 0.82  | 7.00  | 7.21  | 5.4E-10 | 8.6E-09 | 26.80 |
| 3_22 | 8092564 | SFRS10          | 22  | 0.56  | 0.47  | 8.87  | 4.96  | 4.8E-06 | 2.6E-05 | 15.24 |
| 3_22 | 8084541 | VPS8            | 137 | 0.44  | 0.47  | 7.38  | 3.97  | 1.7E-04 | 6.9E-04 | 10.49 |
| 3_22 | 8092523 | EHHADH          | 50  | 0.32  | 0.25  | 6.46  | 2.68  | 9.2E-03 | 2.9E-02 | 5.08  |
| 3_20 | 8092409 | PARL            | 37  | 0.77  | 0.63  | 8.58  | 7.99  | 1.5E-11 | 1.3E-10 | 32.89 |
| 3_20 | 8084439 | EIF4G1          | 13  | 0.76  | 0.72  | 8.89  | 7.96  | 1.8E-11 | 1.3E-10 | 32.89 |
| 3_20 | 8084360 | ABCF3           | 16  | 0.75  | 0.70  | 7.73  | 8.64  | 9.4E-13 | 2.0E-11 | 35.57 |
| 3_20 | 8084323 | DVL3            | 12  | 0.74  | 0.45  | 8.19  | 6.24  | 2.6E-08 | 9.4E-08 | 23.34 |
| 3_20 | 8084232 | YEATS2          | 66  | 0.73  | 0.61  | 7.90  | 5.99  | 7.4E-08 | 2.2E-07 | 22.10 |
| 3_20 | 8084303 | EIF2B5          | 14  | 0.72  | 0.41  | 7.36  | 6.24  | 2.6E-08 | 9.4E-08 | 23.34 |
| 3_20 | 8084219 | KLHL24          | 35  | 0.70  | 0.84  | 8.02  | 7.82  | 3.2E-11 | 1.7E-10 | 32.49 |
| 3_20 | 8084423 | PSMD2           | 10  | 0.66  | 0.83  | 7.55  | 8.61  | 1.1E-12 | 2.0E-11 | 35.57 |
| 3_20 | 8084488 | POLR2H          | 12  | 0.65  | 0.82  | 8.33  | 6.97  | 1.3E-09 | 5.6E-09 | 27.41 |
| 3_20 | 8092457 | ALG3            | 8   | 0.62  | 0.64  | 8.37  | 7.86  | 2.7E-11 | 1.6E-10 | 32.51 |
| 3_20 | 8084345 | AP2M1           | 9   | 0.54  | 0.88  | 9.43  | 8.36  | 3.2E-12 | 3.8E-11 | 34.62 |
| 3_20 | 8092514 | MAGEF1          | 8   | 0.50  | 0.38  | 8.73  | 5.99  | 7.4E-08 | 2.2E-07 | 22.10 |
| 3_20 | 8092328 | MCCC1           | 53  | 0.49  | 0.61  | 7.81  | 5.05  | 3.2E-06 | 8.7E-06 | 16.81 |
| 3_20 | 8092418 | ABCC5           | 57  | 0.43  | 0.38  | 7.22  | 3.62  | 5.5E-04 | 1.3E-03 | 9.56  |
| 3_20 | 8092348 | LAMP3           | 51  | 0.43  | 0.63  | 6.84  | 3.93  | 1.9E-04 | 4.9E-04 | 10.98 |
| 3_20 | 8084397 | ECE2            | 26  | 0.36  | 0.15  | 7.04  | 2.54  | 1.3E-02 | 2.6E-02 | 5.25  |
| 3_20 | 8084299 | HSP90AA5P       | 17  | 0.33  | 0.19  | 4.45  | 2.92  | 4.7E-03 | 9.9E-03 | 6.66  |
| 3_20 | 8084524 | EPHB3           | 19  | 0.28  | 0.38  | 7.17  | 3.09  | 2.9E-03 | 6.4E-03 | 7.28  |
| 3_2  | 8083630 | GFM1            | 32  | 0.62  | 0.56  | 7.19  | 4.64  | 1.6E-05 | 1.1E-04 | 13.20 |
| 3_2  | 8083605 | RSRC1           | 229 | 0.54  | 0.72  | 7.58  | 4.47  | 3.1E-05 | 1.3E-04 | 12.89 |
| 3_2  | 8091658 | CCLN1           | 15  | 0.53  | 0.45  | 8.65  | 3.92  | 2.1E-04 | 6.7E-04 | 10.55 |

|      |         |                 |      |      |      |      |      |         |         |       |
|------|---------|-----------------|------|------|------|------|------|---------|---------|-------|
| 3_2  | 8083616 | MLF1            | 33   | 0.53 | 0.81 | 6.11 | 5.01 | 4.1E-06 | 5.4E-05 | 14.18 |
| 3_2  | 8091678 | VEPH1           | 195  | 0.41 | 0.27 | 5.11 | 2.77 | 7.3E-03 | 1.6E-02 | 5.99  |
| 3_2  | 8083584 | PTX3            | 17   | 0.39 | 0.37 | 5.31 | 3.23 | 1.9E-03 | 5.0E-03 | 7.65  |
| 3_2  | 8091715 | LXN             | 15   | 0.25 | 0.41 | 5.37 | 2.43 | 1.8E-02 | 3.3E-02 | 4.93  |
| 3_2  | 8091698 | SHOX2           | 10   | 0.24 | 0.19 | 6.29 | 2.25 | 2.8E-02 | 4.5E-02 | 4.48  |
| 3_19 | 8092321 | DCUN1D1         | 41   | 0.50 | 0.65 | 6.82 | 4.92 | 8.5E-07 | 1.7E-06 | 19.16 |
| 3_19 | 8092328 | MCCC1           | 53   | 0.49 | 0.54 | 7.81 | 4.13 | 3.7E-05 | 3.7E-05 | 14.73 |
| 3_18 | 8084146 | FXR1            | 37   | 0.60 | 0.69 | 9.20 | 6.08 | 5.4E-08 | 3.8E-07 | 21.34 |
| 3_18 | 8092314 | DNAJC19         | 10   | 0.55 | 0.41 | 6.67 | 4.95 | 4.9E-06 | 1.1E-05 | 16.42 |
| 3_18 | 8092321 | DCUN1D1         | 41   | 0.50 | 0.62 | 6.82 | 4.95 | 4.9E-06 | 1.1E-05 | 16.42 |
| 3_18 | 8084173 | ATP11B          | 66   | 0.30 | 0.46 | 7.39 | 3.60 | 5.8E-04 | 1.0E-03 | 9.95  |
| 3_17 | 8092265 | MRPL47          | 19   | 0.56 | 0.81 | 7.44 | 5.49 | 6.5E-07 | 4.6E-06 | 17.74 |
| 3_17 | 8084067 | ACTL6A          | 40   | 0.54 | 0.68 | 7.48 | 5.59 | 4.4E-07 | 4.6E-06 | 17.74 |
| 3_17 | 8084092 | NDUFB5          | 14   | 0.40 | 0.98 | 8.14 | 4.56 | 2.2E-05 | 1.0E-04 | 13.26 |
| 3_17 | 8084128 | TTC14           | 13   | 0.37 | 0.47 | 7.14 | 2.82 | 6.2E-03 | 1.5E-02 | 6.11  |
| 3_17 | 8092251 | GNB4            | 37   | 0.30 | 0.50 | 6.51 | 4.07 | 1.2E-04 | 4.3E-04 | 11.19 |
| 3_17 | 8084064 | LOC442098       | 19   | 0.20 | 0.54 | 6.99 | 3.38 | 1.2E-03 | 3.3E-03 | 8.23  |
| 3_15 | 8084035 | ZNF639          | 12   | 0.41 | 0.62 | 6.16 | 4.81 | 3.2E-06 | 9.6E-06 | 16.67 |
| 3_15 | 8084045 | MFN1            | 29   | 0.38 | 0.59 | 7.86 | 4.27 | 3.2E-05 | 4.8E-05 | 14.35 |
| 3_15 | 8092251 | GNB4            | 37   | 0.30 | 0.48 | 6.51 | 3.69 | 2.9E-04 | 2.9E-04 | 11.74 |
| 3_14 | 8092201 | TBL1XR1         | 110  | 0.48 | 0.76 | 9.32 | 5.05 | 3.3E-06 | 4.9E-05 | 14.32 |
| 3_14 | 8084016 | PIK3CA          | 217  | 0.47 | 0.65 | 7.66 | 4.66 | 1.5E-05 | 1.1E-04 | 13.15 |
| 3_14 | 8092220 | ---             | 8    | 0.23 | 0.17 | 4.43 | 2.55 | 1.3E-02 | 4.8E-02 | 4.37  |
| 3_14 | 8084014 | ---             | 9    | 0.19 | 0.19 | 4.16 | 2.67 | 9.4E-03 | 4.7E-02 | 4.41  |
| 3_12 | 8083941 | ECT2            | 39   | 0.59 | 0.80 | 7.35 | 3.75 | 3.7E-04 | 4.4E-03 | 7.82  |
| 3_12 | 8092177 | AADAACL1        | 82   | 0.53 | 0.62 | 7.32 | 3.91 | 2.2E-04 | 4.4E-03 | 7.82  |
| 3_10 | 8083794 | MYNN            | 21   | 0.74 | 0.58 | 6.94 | 5.52 | 5.6E-07 | 1.5E-05 | 16.02 |
| 3_10 | 8092035 | PHC3            | 45   | 0.73 | 0.68 | 8.28 | 5.38 | 1.0E-06 | 1.5E-05 | 16.02 |
| 3_10 | 8092002 | ARPM1           | 14   | 0.62 | 0.28 | 5.79 | 4.40 | 3.9E-05 | 2.3E-04 | 12.07 |
| 3_10 | 8091991 | MDS1            | 400  | 0.60 | 0.50 | 7.36 | 4.42 | 3.6E-05 | 2.3E-04 | 12.07 |
| 3_10 | 8083850 | ENST00000359416 | 17   | 0.55 | 0.27 | 5.07 | 3.21 | 2.0E-03 | 6.7E-03 | 7.22  |
| 3_10 | 8083854 | PRKCI           | 41   | 0.54 | 0.76 | 8.93 | 3.55 | 7.0E-04 | 2.6E-03 | 8.58  |
| 3_10 | 8083826 | TLOC1           | 38   | 0.51 | 0.47 | 7.54 | 3.68 | 4.7E-04 | 2.0E-03 | 8.96  |
| 3_10 | 8083808 | ENST00000340806 | 19   | 0.46 | 0.22 | 5.15 | 3.83 | 2.8E-04 | 1.4E-03 | 9.46  |
| 3_10 | 8083876 | SKIL            | 25   | 0.45 | 0.87 | 7.49 | 4.82 | 8.3E-06 | 8.3E-05 | 13.56 |
| 3_10 | 8091972 | EV11            | 63   | 0.38 | 0.70 | 8.60 | 2.89 | 5.1E-03 | 1.5E-02 | 6.02  |
| 3_10 | 8092055 | SLC7A14         | 107  | 0.28 | 0.23 | 5.98 | 2.47 | 1.6E-02 | 4.0E-02 | 4.65  |
| 3_10 | 8092073 | EIF5A2          | 15   | 0.28 | 0.40 | 5.92 | 2.67 | 9.5E-03 | 2.6E-02 | 5.27  |
| 3_1  | 8091648 | SSR3            | 27   | 0.44 | 0.73 | 8.05 | 5.00 | 4.1E-06 | 2.1E-05 | 15.56 |
| 3_1  | 8083569 | TIPARP          | 22   | 0.43 | 0.50 | 7.28 | 3.92 | 2.1E-04 | 5.1E-04 | 10.92 |
| 3_1  | 8083546 | KCNAB1          | 312  | 0.31 | 0.18 | 5.50 | 2.45 | 1.7E-02 | 2.8E-02 | 5.15  |
| 20_9 | 8066347 | PTPRT           | 1076 | 0.58 | 0.48 | 6.23 | 3.23 | 1.9E-03 | 1.9E-03 | 9.01  |
| 20_9 | 8062685 | ---             | 13   | 0.47 | 0.26 | 5.78 | 3.40 | 1.1E-03 | 1.9E-03 | 9.01  |
| 20_8 | 8066347 | PTPRT           | 1076 | 0.58 | -    | 6.23 | -    | -       | 4.0E-03 | 7.98  |
| 20_7 | 8066303 | CHD6            | 129  | 0.70 | 0.52 | 8.14 | 4.41 | 3.4E-05 | 2.9E-04 | 11.77 |
| 20_7 | 8062623 | PLCG1           | 28   | 0.69 | 0.68 | 8.20 | 5.37 | 8.6E-07 | 1.5E-05 | 16.05 |
| 20_7 | 8062658 | LPIN3           | 14   | 0.61 | 0.42 | 7.01 | 4.17 | 8.2E-05 | 4.6E-04 | 11.07 |
| 20_7 | 8062601 | LOC149692       | 10   | 0.59 | 0.38 | 5.83 | 3.44 | 9.5E-04 | 2.3E-03 | 8.76  |
| 20_7 | 8066347 | PTPRT           | 1076 | 0.58 | 0.50 | 6.23 | 3.55 | 6.7E-04 | 2.1E-03 | 8.93  |
| 20_7 | 8066275 | AF090938        | 13   | 0.57 | 0.36 | 4.89 | 3.53 | 7.2E-04 | 2.1E-03 | 8.93  |
| 20_7 | 8062603 | TOP1            | 50   | 0.55 | 0.42 | 8.60 | 3.87 | 2.3E-04 | 9.7E-04 | 10.02 |
| 20_7 | 8066279 | ZHX3            | 72   | 0.46 | 0.25 | 6.50 | 2.94 | 4.3E-03 | 9.2E-03 | 6.77  |
| 20_7 | 8066273 | ---             | 17   | 0.45 | 0.26 | 5.49 | 2.57 | 1.2E-02 | 2.1E-02 | 5.58  |
| 20_7 | 8066294 | EMILIN3         | 9    | 0.34 | 0.20 | 6.01 | 2.58 | 1.2E-02 | 2.1E-02 | 5.58  |
| 20_7 | 8066266 | MAFB            | 11   | 0.24 | 0.24 | 7.07 | 2.23 | 2.9E-02 | 4.5E-02 | 4.48  |
| 20_6 | 8062576 | DHX35           | 59   | 0.84 | 0.61 | 6.78 | 6.53 | 9.5E-09 | 9.3E-08 | 23.36 |
| 20_6 | 8066200 | KIAA0406        | 33   | 0.76 | 0.61 | 7.45 | 6.75 | 3.7E-09 | 5.5E-08 | 24.12 |
| 20_6 | 8062213 | PHF20           | 99   | 0.74 | 0.36 | 7.19 | 3.18 | 2.2E-03 | 4.5E-03 | 7.80  |
| 20_6 | 8062409 | CTNBL1          | 149  | 0.74 | 0.45 | 7.33 | 7.48 | 1.8E-10 | 1.0E-08 | 26.52 |
| 20_6 | 8062433 | C20orf77        | 38   | 0.72 | 0.49 | 8.32 | 6.44 | 1.3E-08 | 1.1E-07 | 23.08 |
| 20_6 | 8062286 | ENST00000373932 | 18   | 0.71 | 0.43 | 7.33 | 6.55 | 8.4E-09 | 9.3E-08 | 23.36 |
| 20_6 | 8062545 | ACTR5           | 35   | 0.68 | 0.39 | 7.33 | 6.20 | 3.6E-08 | 2.6E-07 | 21.86 |
| 20_6 | 8062319 | TGIF2           | 11   | 0.67 | 0.39 | 7.71 | 4.13 | 1.0E-04 | 3.0E-04 | 11.72 |
| 20_6 | 8066254 | LOC388796       | 14   | 0.66 | 0.53 | 7.73 | 7.28 | 4.0E-10 | 1.2E-08 | 26.32 |
| 20_6 | 8066091 | C20orf117       | 44   | 0.66 | 0.38 | 7.06 | 4.47 | 3.0E-05 | 1.1E-04 | 13.13 |
| 20_6 | 8066074 | DSN1            | 15   | 0.64 | 0.60 | 6.89 | 4.97 | 4.7E-06 | 2.5E-05 | 15.27 |
| 20_6 | 8062371 | MANBAL          | 27   | 0.64 | 0.46 | 7.25 | 6.07 | 6.2E-08 | 4.1E-07 | 21.23 |
| 20_6 | 8066247 | LOC388796       | 18   | 0.62 | 0.52 | 7.42 | 6.86 | 2.4E-09 | 4.6E-08 | 24.37 |
| 20_6 | 8062571 | FAM83D          | 20   | 0.60 | 0.48 | 7.28 | 5.61 | 3.8E-07 | 2.3E-06 | 18.76 |
| 20_6 | 8066136 | RBL1            | 172  | 0.59 | 0.66 | 6.92 | 4.84 | 7.6E-06 | 3.7E-05 | 14.71 |
| 20_6 | 8062492 | KIAA1219        | 70   | 0.58 | 0.45 | 8.46 | 4.06 | 1.3E-04 | 3.3E-04 | 11.54 |
| 20_6 | 8066031 | SCAND1          | 11   | 0.56 | 0.27 | 6.90 | 4.53 | 2.4E-05 | 9.4E-05 | 13.38 |
| 20_6 | 8062293 | DLGAP4          | 111  | 0.56 | 0.24 | 7.89 | 3.49 | 8.5E-04 | 1.9E-03 | 9.01  |
| 20_6 | 8066051 | NDRG3           | 42   | 0.54 | 0.52 | 6.74 | 4.20 | 7.7E-05 | 2.4E-04 | 12.02 |
| 20_6 | 8066195 | BLCAP           | 15   | 0.54 | 0.28 | 8.97 | 4.05 | 1.3E-04 | 3.3E-04 | 11.54 |
| 20_6 | 8066161 | C20orf132       | 46   | 0.51 | 0.29 | 5.79 | 4.09 | 1.1E-04 | 3.2E-04 | 11.61 |
| 20_6 | 8062480 | C20orf198       | 12   | 0.51 | 0.28 | 7.23 | 4.73 | 1.2E-05 | 5.2E-05 | 14.23 |
| 20_6 | 8062349 | RPN2            | 57   | 0.47 | 0.68 | 8.94 | 4.66 | 1.5E-05 | 6.2E-05 | 13.98 |
| 20_6 | 8062444 | BPI             | 43   | 0.44 | 0.33 | 5.80 | 4.38 | 4.2E-05 | 1.4E-04 | 12.84 |
| 20_6 | 8066072 | ---             | 5    | 0.44 | 0.23 | 4.55 | 3.25 | 1.8E-03 | 3.9E-03 | 8.02  |
| 20_6 | 8066210 | ---             | 15   | 0.42 | 0.37 | 3.74 | 2.63 | 1.0E-02 | 1.9E-02 | 5.74  |
| 20_6 | 8062326 | C20orf24        | 8    | 0.40 | 0.46 | 7.79 | 4.41 | 3.7E-05 | 1.3E-04 | 12.93 |
| 20_6 | 8062395 | NNAT            | 11   | 0.39 | 0.33 | 6.46 | 3.94 | 1.9E-04 | 4.7E-04 | 11.07 |
| 20_6 | 8066038 | SLA2            | 22   | 0.38 | 0.24 | 6.15 | 3.05 | 3.3E-03 | 6.2E-03 | 7.33  |
| 20_6 | 8062251 | EPB41L1         | 70   | 0.36 | 0.32 | 7.17 | 2.96 | 4.2E-03 | 7.7E-03 | 7.01  |
| 20_6 | 8062555 | ENST00000362821 | 15   | 0.35 | 0.20 | 5.19 | 2.55 | 1.3E-02 | 2.2E-02 | 5.52  |
| 20_6 | 8062284 | ---             | 13   | 0.33 | 0.30 | 7.87 | 2.19 | 3.2E-02 | 5.0E-02 | 4.33  |
| 20_6 | 8062237 | C20orf152       | 39   | 0.29 | 0.30 | 5.95 | 3.69 | 4.4E-04 | 1.0E-03 | 9.90  |
| 20_6 | 8062377 | SRC             | 38   | 0.29 | 0.24 | 7.14 | 3.07 | 3.0E-03 | 6.0E-03 | 7.39  |
| 20_6 | 8062404 | ENST00000373508 | 43   | 0.25 | 0.21 | 6.14 | 2.61 | 1.1E-02 | 1.9E-02 | 5.69  |
| 20_6 | 8066212 | ---             | 5    | 0.25 | 0.30 | 7.12 | 2.53 | 1.4E-02 | 2.2E-02 | 5.48  |
| 20_6 | 8062347 | RBL1            | 45   | 0.23 | 0.23 | 6.82 | 2.35 | 2.2E-02 | 3.5E-02 | 4.85  |
| 20_6 | 8066260 | SNORA71C        | 13   | 0.18 | 0.47 | 8.71 | 3.19 | 2.2E-03 | 4.5E-03 | 7.80  |
| 20_5 | 8065963 | RBM12           | 23   | 0.75 | 0.57 | 8.58 | 5.24 | 1.3E-06 | 6.4E-06 | 17.26 |
| 20_5 | 8065992 | NFS1            | 18   | 0.62 | 0.31 | 7.58 | 3.94 | 1.8E-04 | 2.9E-04 | 11.73 |
| 20_5 | 8066009 | RBM39           | 31   | 0.62 | 0.48 | 9.91 | 3.98 | 1.5E-04 | 2.9E-04 | 11.73 |
| 20_5 | 8065990 | ---             | 13   | 0.50 | 0.42 | 4.62 | 3.56 | 6.3E-04 | 6.3E-04 | 10.64 |
| 20_5 | 8062206 | C20orf52        | 8    | 0.50 | 0.34 | 7.62 | 3.58 | 5.9E-04 | 6.3E-04 | 10.64 |
| 20_4 | 8065963 | RBM12           | 23   | 0.75 | 0.62 | 8.58 | 6.04 | 5.5E-08 | 1.0E-06 | 19.93 |
| 20_4 | 8062137 | CEP250          | 52   | 0.74 | 0.45 | 6.97 | 5.47 | 5.6E-07 | 3.0E-06 | 18.34 |
| 20_4 | 8065776 | NCOA6           | 62   | 0.74 | 0.49 | 8.03 | 5.63 | 3.0E-07 | 2.3E-06 | 18.75 |
| 20_4 | 8065889 | UQCC            | 66   | 0.70 | 0.51 | 7.52 | 5.04 | 3.2E-06 | 1.1E-05 | 16.45 |
| 20_4 | 8062016 | DYNLRB1         | 18   | 0.70 | 0.49 | 7.96 | 5.93 | 8.7E-08 | 1.0E-06 | 19.93 |
| 20_4 | 8065798 | GGTL3           | 17   | 0.64 | 0.51 | 7.00 | 5.96 | 7.4E-08 | 1.0E-06 | 19.93 |
| 20_4 | 8061966 | RALY            | 43   | 0.64 | 0.48 | 8.94 | 5.65 | 2.7E-07 | 2.3E-06 | 18.75 |
| 20_4 | 8065730 | EIF2S2          | 15   | 0.62 | 0.47 | 7.79 | 4.88 | 5.7E-06 | 1.6E-05 | 15.90 |

|       |         |                    |     |      |      |      |      |         |         |       |
|-------|---------|--------------------|-----|------|------|------|------|---------|---------|-------|
| 20_4  | 8065832 | TRPC4AP            | 57  | 0.62 | 0.53 | 8.35 | 5.48 | 5.4E-07 | 3.0E-06 | 18.34 |
| 20_4  | 8065762 | PIGU               | 48  | 0.61 | 0.84 | 7.40 | 7.03 | 7.9E-10 | 3.6E-08 | 24.72 |
| 20_4  | 8065693 | APBA2BP            | 10  | 0.59 | 0.40 | 7.41 | 5.46 | 5.9E-07 | 3.0E-06 | 18.34 |
| 20_4  | 8065719 | PXMP4              | 12  | 0.58 | 0.44 | 6.65 | 4.97 | 4.0E-06 | 1.3E-05 | 16.21 |
| 20_4  | 8065903 | ---                | 11  | 0.58 | 0.51 | 6.21 | 4.92 | 4.9E-06 | 1.5E-05 | 16.02 |
| 20_4  | 8065868 | EIF6               | 13  | 0.56 | 0.49 | 8.22 | 5.38 | 8.2E-07 | 3.8E-06 | 18.01 |
| 20_4  | 8061919 | CBFA2T2            | 61  | 0.55 | 0.36 | 6.67 | 3.75 | 3.5E-04 | 7.3E-04 | 10.41 |
| 20_4  | 8061986 | ITCH               | 63  | 0.54 | 0.38 | 8.41 | 3.82 | 2.7E-04 | 5.9E-04 | 10.73 |
| 20_4  | 8061958 | CHMP4B             | 28  | 0.53 | 0.23 | 8.74 | 3.56 | 6.6E-04 | 1.3E-03 | 9.58  |
| 20_4  | 8062041 | ACSS2              | 30  | 0.53 | 0.36 | 7.33 | 4.47 | 2.8E-05 | 7.0E-05 | 13.80 |
| 20_4  | 8065710 | E2F1               | 6   | 0.51 | 0.32 | 7.25 | 4.44 | 3.1E-05 | 7.5E-05 | 13.71 |
| 20_4  | 8065855 | EDEM2              | 42  | 0.49 | 0.49 | 6.81 | 5.21 | 1.6E-06 | 6.8E-06 | 17.17 |
| 20_4  | 8065738 | AHCY               | 15  | 0.49 | 0.46 | 8.81 | 4.25 | 6.1E-05 | 1.4E-04 | 12.79 |
| 20_4  | 8062174 | ERGIC3             | 9   | 0.48 | 0.63 | 9.70 | 4.50 | 2.4E-05 | 6.5E-05 | 13.91 |
| 20_4  | 8062123 | MMP24              | 31  | 0.47 | 0.24 | 6.28 | 3.20 | 2.0E-03 | 3.8E-03 | 8.06  |
| 20_4  | 8065817 | GSS                | 22  | 0.45 | 0.43 | 7.98 | 5.06 | 2.9E-06 | 1.1E-05 | 16.46 |
| 20_4  | 8065911 | C20orf173          | 13  | 0.43 | 0.17 | 6.07 | 2.16 | 3.4E-02 | 4.7E-02 | 4.40  |
| 20_4  | 8065758 | FLJ38773           | 7   | 0.39 | 0.35 | 7.28 | 3.37 | 1.2E-03 | 2.3E-03 | 8.79  |
| 20_4  | 8061982 | ASIP               | 13  | 0.35 | 0.17 | 6.37 | 2.23 | 2.9E-02 | 4.1E-02 | 4.61  |
| 20_4  | 8062134 | GDFSOS             | 9   | 0.34 | 0.22 | 6.03 | 2.58 | 1.2E-02 | 2.0E-02 | 5.62  |
| 20_4  | 8062023 | MAP1LC3A           | 9   | 0.34 | 0.19 | 6.59 | 2.44 | 1.7E-02 | 2.7E-02 | 5.21  |
| 20_4  | 8065905 | GDF5               | 18  | 0.32 | 0.19 | 5.82 | 2.59 | 1.2E-02 | 2.0E-02 | 5.62  |
| 20_4  | 8065756 | GENSCAN00000000672 | 2   | 0.31 | 0.25 | 5.91 | 2.55 | 1.3E-02 | 2.1E-02 | 5.59  |
| 20_4  | 8065880 | FAM83C             | 13  | 0.30 | 0.23 | 7.29 | 2.26 | 2.7E-02 | 4.0E-02 | 4.64  |
| 20_4  | 8062064 | MYH7B              | 28  | 0.28 | 0.20 | 6.42 | 2.31 | 2.4E-02 | 3.6E-02 | 4.78  |
| 20_4  | 8062108 | PROCR              | 19  | 0.20 | 0.13 | 6.39 | 2.13 | 3.6E-02 | 4.9E-02 | 4.35  |
| 20_20 | 8063814 | LSM14B             | 21  | 0.76 | 0.52 | 7.15 | 7.40 | 2.0E-10 | 1.7E-08 | 25.80 |
| 20_20 | 8063857 | GTPBP5             | 23  | 0.72 | 0.33 | 7.59 | 5.62 | 3.5E-07 | 4.9E-06 | 17.65 |
| 20_20 | 8063839 | SS18L1             | 36  | 0.71 | 0.38 | 6.99 | 5.78 | 1.8E-07 | 3.9E-06 | 17.99 |
| 20_20 | 8067361 | TAF4               | 62  | 0.70 | 0.35 | 7.86 | 5.27 | 1.4E-06 | 1.4E-05 | 16.10 |
| 20_20 | 8064218 | PRPF6              | 32  | 0.69 | 0.43 | 8.24 | 3.71 | 4.1E-04 | 1.6E-03 | 9.30  |
| 20_20 | 8064302 | PCMTD2             | 29  | 0.67 | 0.53 | 8.72 | 4.15 | 9.1E-05 | 5.4E-04 | 10.85 |
| 20_20 | 8063835 | LSM14B             | 13  | 0.66 | 0.63 | 6.53 | 7.22 | 4.5E-10 | 1.9E-08 | 25.65 |
| 20_20 | 8067563 | DIDO1              | 49  | 0.64 | 0.40 | 8.05 | 5.70 | 2.5E-07 | 4.2E-06 | 17.87 |
| 20_20 | 8067727 | ARFRP1             | 10  | 0.62 | 0.23 | 7.55 | 3.68 | 4.5E-04 | 1.6E-03 | 9.25  |
| 20_20 | 8064208 | DNAJC5             | 25  | 0.62 | 0.22 | 8.28 | 4.01 | 1.5E-04 | 8.2E-04 | 10.25 |
| 20_20 | 8067593 | YTHDF1             | 19  | 0.61 | 0.52 | 8.46 | 6.45 | 1.1E-08 | 3.2E-07 | 21.59 |
| 20_20 | 8067773 | ZNF512B            | 39  | 0.60 | 0.31 | 7.39 | 3.61 | 5.6E-04 | 1.9E-03 | 9.02  |
| 20_20 | 8064191 | TPD52L2            | 14  | 0.59 | 0.43 | 8.10 | 3.89 | 2.2E-04 | 1.1E-03 | 9.77  |
| 20_20 | 8067495 | CABLES2            | 14  | 0.57 | 0.29 | 6.97 | 3.88 | 2.3E-04 | 1.1E-03 | 9.77  |
| 20_20 | 8067382 | PSMA7              | 18  | 0.57 | 0.44 | 8.31 | 5.43 | 7.3E-07 | 8.7E-06 | 16.81 |
| 20_20 | 8067756 | UCKL1              | 8   | 0.56 | 0.36 | 7.28 | 3.78 | 3.3E-04 | 1.4E-03 | 9.51  |
| 20_20 | 8063873 | OSBP2L             | 44  | 0.55 | 0.38 | 7.94 | 3.70 | 4.2E-04 | 1.6E-03 | 9.30  |
| 20_20 | 8063755 | C20orf177          | 20  | 0.54 | 0.49 | 5.75 | 4.59 | 1.8E-05 | 1.3E-04 | 12.92 |
| 20_20 | 8067554 | TCFL5              | 16  | 0.50 | 0.32 | 7.55 | 4.69 | 1.3E-05 | 9.9E-05 | 13.31 |
| 20_20 | 8064042 | ARFGAP1            | 10  | 0.50 | 0.23 | 7.82 | 3.82 | 2.8E-04 | 1.2E-03 | 9.67  |
| 20_20 | 8063793 | LOC284757          | 35  | 0.50 | 0.33 | 6.01 | 2.81 | 6.4E-03 | 1.5E-02 | 6.03  |
| 20_20 | 8064007 | C20orf11           | 10  | 0.50 | 0.65 | 8.39 | 5.23 | 1.6E-06 | 1.5E-05 | 16.02 |
| 20_20 | 8067709 | GMEB2              | 35  | 0.49 | 0.19 | 7.78 | 3.83 | 2.7E-04 | 1.2E-03 | 9.67  |
| 20_20 | 8064245 | TCEA2              | 13  | 0.48 | 0.17 | 7.46 | 2.59 | 1.2E-02 | 2.6E-02 | 5.25  |
| 20_20 | 8067380 | LSM14B             | 13  | 0.46 | 0.21 | 5.32 | 3.18 | 2.2E-03 | 5.9E-03 | 7.41  |
| 20_20 | 8063949 | C20orf20           | 11  | 0.44 | 0.27 | 7.27 | 4.88 | 6.3E-06 | 5.3E-05 | 14.21 |
| 20_20 | 8063903 | RPS21              | 11  | 0.44 | 0.37 | 8.59 | 3.50 | 8.1E-04 | 2.5E-03 | 8.63  |
| 20_20 | 8064277 | MYT1               | 80  | 0.43 | 0.31 | 6.39 | 4.15 | 8.9E-05 | 5.4E-04 | 10.85 |
| 20_20 | 8063893 | ADRM1              | 13  | 0.43 | 0.34 | 8.20 | 3.60 | 5.7E-04 | 1.9E-03 | 9.02  |
| 20_20 | 8067305 | SYCP2              | 40  | 0.41 | 0.66 | 4.75 | 3.57 | 6.3E-04 | 2.0E-03 | 8.93  |
| 20_20 | 8067409 | LAMA5              | 25  | 0.41 | 0.48 | 8.63 | 3.34 | 1.3E-03 | 4.0E-03 | 7.96  |
| 20_20 | 8063921 | hsa-mir-1-1        | 9   | 0.40 | 0.27 | 3.97 | 3.25 | 1.8E-03 | 4.9E-03 | 7.67  |
| 20_20 | 8064111 | TNFRSF6B           | 40  | 0.37 | 0.17 | 7.01 | 3.11 | 2.7E-03 | 6.9E-03 | 7.19  |
| 20_20 | 8063761 | CDH26              | 73  | 0.36 | 0.25 | 5.96 | 3.17 | 2.2E-03 | 5.9E-03 | 7.41  |
| 20_20 | 8063785 | GENSCAN00000041041 | 40  | 0.36 | 0.23 | 6.34 | 2.64 | 1.0E-02 | 2.3E-02 | 5.41  |
| 20_20 | 8067358 | ENST00000317652    | 20  | 0.36 | 0.21 | 5.60 | 2.84 | 5.9E-03 | 1.5E-02 | 6.11  |
| 20_20 | 8064175 | SLC2A4RG           | 11  | 0.28 | 0.26 | 7.32 | 3.28 | 1.6E-03 | 4.6E-03 | 7.76  |
| 20_20 | 8067680 | PRIC285            | 10  | 0.28 | 0.19 | 7.25 | 2.50 | 1.5E-02 | 3.3E-02 | 4.93  |
| 20_2  | 8061919 | CBFA2T2            | 61  | 0.55 | 0.41 | 6.67 | 4.32 | 5.1E-05 | 1.0E-04 | 13.25 |
| 20_2  | 8065683 | SNTA1              | 14  | 0.41 | 0.18 | 7.44 | 3.13 | 2.5E-03 | 2.5E-03 | 8.63  |
| 20_18 | 8063620 | VAPB               | 65  | 0.65 | 0.48 | 7.70 | 5.44 | 7.6E-07 | 9.1E-06 | 16.74 |
| 20_18 | 8063607 | RAB22A             | 47  | 0.61 | 0.45 | 8.29 | 5.20 | 2.0E-06 | 1.4E-05 | 16.16 |
| 20_18 | 8063697 | TH1L               | 16  | 0.59 | 0.57 | 8.40 | 4.78 | 9.4E-06 | 5.0E-05 | 14.30 |
| 20_18 | 8063716 | TUBB1              | 12  | 0.58 | 0.33 | 5.93 | 5.40 | 8.7E-07 | 9.1E-06 | 16.74 |
| 20_18 | 8063668 | GNAS               | 51  | 0.56 | 0.29 | 8.92 | 3.51 | 8.0E-04 | 2.1E-03 | 8.90  |
| 20_18 | 8063650 | NPEPL1             | 22  | 0.55 | 0.18 | 7.35 | 2.60 | 1.1E-02 | 2.2E-02 | 5.51  |
| 20_18 | 8067248 | PPP4R1L            | 88  | 0.54 | 0.31 | 6.43 | 3.31 | 1.5E-03 | 3.1E-03 | 8.33  |
| 20_18 | 8067295 | SLMO2              | 15  | 0.52 | 0.61 | 8.48 | 4.48 | 2.9E-05 | 1.2E-04 | 13.03 |
| 20_18 | 8063723 | ENST00000371030    | 68  | 0.42 | 0.20 | 6.18 | 2.42 | 1.8E-02 | 3.1E-02 | 4.99  |
| 20_18 | 8067305 | SYCP2              | 40  | 0.41 | 0.64 | 4.75 | 3.40 | 1.1E-03 | 2.6E-03 | 8.58  |
| 20_18 | 8063636 | STX16              | 32  | 0.36 | 0.46 | 8.19 | 3.84 | 2.7E-04 | 9.5E-04 | 10.04 |
| 20_18 | 8067288 | ATP5E              | 9   | 0.35 | 0.41 | 7.72 | 3.65 | 5.0E-04 | 1.5E-03 | 9.38  |
| 20_16 | 8063509 | C20orf43           | 41  | 0.71 | 0.48 | 7.77 | 7.11 | 9.7E-10 | 1.4E-08 | 26.10 |
| 20_16 | 8063566 | RAE1               | 28  | 0.71 | 0.72 | 7.57 | 7.08 | 1.1E-09 | 1.4E-08 | 26.10 |
| 20_16 | 8063522 | ---                | 10  | 0.61 | 0.26 | 4.14 | 3.94 | 1.9E-04 | 1.2E-03 | 9.69  |
| 20_16 | 8067201 | ENST00000388144    | 15  | 0.56 | 0.64 | 6.03 | 4.13 | 1.0E-04 | 8.6E-04 | 10.18 |
| 20_16 | 8067199 | ENST00000388140    | 15  | 0.54 | 0.30 | 4.78 | 2.93 | 4.6E-03 | 1.9E-02 | 5.70  |
| 20_16 | 8063583 | RBM38              | 21  | 0.48 | 0.29 | 7.43 | 2.72 | 8.4E-03 | 3.0E-02 | 5.06  |
| 20_16 | 8067178 | GCNT7              | 30  | 0.45 | 0.21 | 6.23 | 2.61 | 1.1E-02 | 3.5E-02 | 4.84  |
| 20_16 | 8067185 | BMP7               | 88  | 0.37 | 0.66 | 6.70 | 3.71 | 4.3E-04 | 2.1E-03 | 8.86  |
| 20_15 | 8063484 | CSTF1              | 28  | 0.77 | 0.60 | 7.04 | 8.03 | 1.8E-11 | 3.5E-11 | 34.72 |
| 20_15 | 8067167 | AURKA              | 45  | 0.54 | 0.72 | 6.52 | 5.55 | 4.9E-07 | 4.9E-07 | 20.97 |
| 20_14 | 8067094 | ZFP64              | 79  | 0.74 | 0.43 | 6.75 | 5.34 | 1.1E-06 | 2.7E-05 | 15.18 |
| 20_14 | 8063453 | PFND4              | 29  | 0.62 | 0.56 | 5.60 | 4.95 | 5.1E-06 | 4.1E-05 | 14.59 |
| 20_14 | 8067155 | ENST00000388080    | 24  | 0.60 | 0.25 | 5.26 | 3.13 | 2.6E-03 | 1.0E-02 | 6.59  |
| 20_14 | 8067055 | ATP9A              | 145 | 0.60 | 0.53 | 8.21 | 3.83 | 2.8E-04 | 1.7E-03 | 9.24  |
| 20_14 | 8063433 | ---                | 21  | 0.58 | 0.25 | 4.90 | 2.63 | 1.1E-02 | 3.2E-02 | 4.98  |
| 20_14 | 8067121 | SUMO1P1            | 19  | 0.55 | 0.21 | 6.03 | 2.38 | 2.0E-02 | 4.8E-02 | 4.39  |
| 20_14 | 8067167 | AURKA              | 45  | 0.54 | 0.68 | 6.51 | 5.15 | 2.3E-06 | 2.8E-05 | 15.12 |
| 20_14 | 8063476 | MC3R               | 35  | 0.49 | 0.35 | 6.64 | 3.17 | 2.3E-03 | 1.0E-02 | 6.59  |
| 20_14 | 8063444 | TSHZ2              | 17  | 0.48 | 0.28 | 6.09 | 2.42 | 1.8E-02 | 4.8E-02 | 4.39  |
| 20_14 | 8063447 | ---                | 18  | 0.39 | 0.48 | 4.89 | 3.06 | 3.1E-03 | 1.1E-02 | 6.54  |
| 20_12 | 8066953 | SPATA2             | 20  | 0.73 | 0.35 | 6.71 | 5.47 | 6.6E-07 | 2.8E-06 | 18.45 |
| 20_12 | 8063427 | MOCOS3             | 14  | 0.71 | 0.46 | 6.17 | 6.41 | 1.5E-08 | 2.1E-07 | 22.18 |
| 20_12 | 8066964 | TMEM189            | 47  | 0.71 | 0.49 | 7.31 | 7.22 | 5.0E-10 | 1.9E-08 | 25.66 |
| 20_12 | 8063315 | DDX27              | 27  | 0.71 | 0.59 | 7.49 | 6.22 | 3.2E-08 | 2.4E-07 | 21.97 |
| 20_12 | 8063351 | SLC9A8             | 63  | 0.70 | 0.43 | 7.36 | 4.60 | 1.8E-05 | 5.8E-05 | 14.07 |
| 20_12 | 8066889 | STAU1              | 47  | 0.65 | 0.57 | 8.43 | 6.28 | 2.5E-08 | 2.3E-07 | 22.03 |
| 20_12 | 8067011 | ADNP               | 44  | 0.62 | 0.64 | 8.59 | 5.70 | 2.6E-07 | 1.3E-06 | 19.61 |
| 20_12 | 8063283 | CSE1L              | 40  | 0.62 | 0.96 | 8.23 | 6.09 | 5.3E-08 | 3.4E-07 | 21.50 |

|       |         |                 |     |      |      |      |      |         |         |       |
|-------|---------|-----------------|-----|------|------|------|------|---------|---------|-------|
| 20_12 | 8063242 | ARFGEF2         | 84  | 0.60 | 0.59 | 8.09 | 5.92 | 1.1E-07 | 5.9E-07 | 20.70 |
| 20_12 | 8063394 | PTPN1           | 174 | 0.57 | 0.35 | 7.97 | 4.77 | 9.9E-06 | 3.4E-05 | 14.84 |
| 20_12 | 8063345 | ENST00000386307 | 11  | 0.52 | 0.64 | 5.24 | 5.13 | 2.5E-06 | 9.5E-06 | 16.69 |
| 20_12 | 8067017 | DPM1            | 22  | 0.50 | 0.83 | 7.93 | 6.38 | 1.7E-08 | 2.1E-07 | 22.18 |
| 20_12 | 8063410 | PARD6B          | 16  | 0.50 | 0.45 | 8.97 | 3.47 | 9.0E-04 | 2.4E-03 | 8.68  |
| 20_12 | 8066905 | ZNF313          | 34  | 0.47 | 0.42 | 7.68 | 2.95 | 4.3E-03 | 9.5E-03 | 6.71  |
| 20_12 | 8063369 | ZNF313          | 16  | 0.44 | 0.39 | 7.96 | 3.34 | 1.3E-03 | 3.4E-03 | 8.21  |
| 20_12 | 8066921 | KCNB1           | 88  | 0.44 | 0.21 | 6.16 | 2.35 | 2.2E-02 | 3.7E-02 | 4.75  |
| 20_12 | 8066848 | PREX1           | 134 | 0.41 | 0.31 | 7.08 | 2.77 | 7.2E-03 | 1.4E-02 | 6.11  |
| 20_12 | 8063349 | ---             | 13  | 0.40 | 0.18 | 4.45 | 2.33 | 2.3E-02 | 3.7E-02 | 4.75  |
| 20_12 | 8067029 | KCNG1           | 13  | 0.38 | 0.41 | 6.82 | 3.29 | 1.6E-03 | 3.7E-03 | 8.06  |
| 20_12 | 8063337 | C20orf199       | 20  | 0.37 | 0.51 | 8.28 | 3.77 | 3.4E-04 | 1.0E-03 | 9.97  |
| 20_12 | 8066960 | ---             | 14  | 0.37 | 0.27 | 5.45 | 2.87 | 5.4E-03 | 1.1E-02 | 6.44  |
| 20_12 | 8067033 | KCNG1           | 15  | 0.34 | 0.19 | 6.95 | 2.45 | 1.7E-02 | 3.2E-02 | 4.98  |
| 20_12 | 8063389 | LOC284751       | 31  | 0.33 | 0.25 | 6.92 | 2.34 | 2.2E-02 | 3.7E-02 | 4.75  |
| 20_10 | 8062981 | PIGT            | 25  | 0.74 | 0.65 | 7.85 | 7.77 | 5.8E-11 | 4.2E-09 | 27.81 |
| 20_10 | 8066697 | SLC35C2         | 19  | 0.68 | 0.42 | 7.70 | 4.65 | 1.6E-05 | 1.6E-04 | 12.57 |
| 20_10 | 8063028 | DNNT1P1         | 22  | 0.68 | 0.38 | 7.56 | 5.09 | 3.0E-06 | 4.4E-05 | 14.46 |
| 20_10 | 8063043 | UBE2C           | 13  | 0.68 | 0.75 | 7.64 | 6.71 | 4.6E-09 | 1.7E-07 | 22.50 |
| 20_10 | 8066461 | TOMM34          | 33  | 0.66 | 0.58 | 7.59 | 5.18 | 2.2E-06 | 4.0E-05 | 14.61 |
| 20_10 | 8063074 | ZSWIM1          | 15  | 0.66 | 0.28 | 6.82 | 5.40 | 9.4E-07 | 2.3E-05 | 15.42 |
| 20_10 | 8066668 | NCOA5           | 32  | 0.65 | 0.36 | 8.06 | 4.91 | 6.0E-06 | 7.3E-05 | 13.73 |
| 20_10 | 8063097 | C20orf67        | 14  | 0.65 | 0.32 | 7.22 | 3.79 | 3.3E-04 | 2.0E-03 | 8.97  |
| 20_10 | 8066598 | ACOT8           | 19  | 0.64 | 0.25 | 7.11 | 4.10 | 1.1E-04 | 1.0E-03 | 9.95  |
| 20_10 | 8062890 | C20orf119       | 49  | 0.60 | 0.35 | 7.52 | 3.37 | 1.2E-03 | 4.3E-03 | 7.85  |
| 20_10 | 8066612 | NEURL2          | 12  | 0.58 | 0.25 | 7.00 | 4.07 | 1.2E-04 | 1.0E-03 | 9.95  |
| 20_10 | 8066641 | ZNF335          | 28  | 0.57 | 0.22 | 7.25 | 3.54 | 7.4E-04 | 3.0E-03 | 8.39  |
| 20_10 | 8066786 | ZMYND8          | 74  | 0.56 | 0.52 | 7.94 | 3.72 | 4.0E-04 | 2.0E-03 | 8.97  |
| 20_10 | 8063057 | SNX21           | 18  | 0.56 | 0.20 | 7.02 | 3.72 | 4.1E-04 | 2.0E-03 | 8.97  |
| 20_10 | 8063209 | ENST00000360965 | 12  | 0.56 | 0.30 | 6.02 | 3.38 | 1.2E-03 | 4.3E-03 | 7.85  |
| 20_10 | 8066745 | ZNF334          | 22  | 0.53 | 0.46 | 6.39 | 2.25 | 2.8E-02 | 4.6E-02 | 4.43  |
| 20_10 | 8066528 | ENST00000300192 | 19  | 0.52 | 0.40 | 4.87 | 3.88 | 2.4E-04 | 1.6E-03 | 9.26  |
| 20_10 | 8066716 | ELMO2           | 27  | 0.51 | 0.39 | 7.38 | 3.72 | 4.1E-04 | 2.0E-03 | 8.97  |
| 20_10 | 8066739 | ZNF663          | 39  | 0.51 | 0.24 | 4.93 | 2.58 | 1.2E-02 | 2.6E-02 | 5.24  |
| 20_10 | 8062964 | YSY1            | 21  | 0.51 | 0.24 | 7.30 | 3.26 | 1.7E-03 | 5.3E-03 | 7.57  |
| 20_10 | 8066609 | C20orf165       | 14  | 0.51 | 0.23 | 6.58 | 3.29 | 1.6E-03 | 5.1E-03 | 7.62  |
| 20_10 | 8062971 | DBNDD2          | 13  | 0.47 | 0.18 | 7.57 | 2.60 | 1.1E-02 | 2.6E-02 | 5.27  |
| 20_10 | 8066521 | C20orf10        | 18  | 0.46 | 0.20 | 6.01 | 2.65 | 1.0E-02 | 2.4E-02 | 5.37  |
| 20_10 | 8062908 | STK4            | 74  | 0.46 | 0.36 | 8.47 | 3.13 | 2.6E-03 | 6.8E-03 | 7.20  |
| 20_10 | 8062880 | YWHAB           | 21  | 0.45 | 0.41 | 8.92 | 3.33 | 1.4E-03 | 4.7E-03 | 7.74  |
| 20_10 | 8066776 | TP53RK          | 19  | 0.44 | 0.22 | 6.51 | 3.66 | 5.0E-04 | 2.3E-03 | 8.79  |
| 20_10 | 8063071 | ZSWIM3          | 22  | 0.43 | 0.15 | 5.83 | 2.34 | 2.2E-02 | 4.1E-02 | 4.63  |
| 20_10 | 8063187 | EYA2            | 368 | 0.43 | 0.52 | 7.73 | 2.32 | 2.3E-02 | 4.1E-02 | 4.61  |
| 20_10 | 8066542 | SPINLW1         | 9   | 0.42 | 0.40 | 5.71 | 3.14 | 2.5E-03 | 6.8E-03 | 7.21  |
| 20_10 | 8062933 | SEMG1           | 34  | 0.41 | 0.33 | 5.54 | 3.14 | 2.5E-03 | 6.8E-03 | 7.21  |
| 20_10 | 8066569 | WFDC11          | 22  | 0.41 | 0.20 | 4.82 | 2.38 | 2.0E-02 | 3.9E-02 | 4.70  |
| 20_10 | 8063211 | NCOA3           | 101 | 0.39 | 0.50 | 8.28 | 3.49 | 8.4E-04 | 3.2E-03 | 8.28  |
| 20_10 | 8063011 | WFDC10A         | 15  | 0.39 | 0.33 | 5.82 | 3.21 | 2.0E-03 | 5.9E-03 | 7.40  |
| 20_10 | 8066530 | AY372172        | 19  | 0.39 | 0.16 | 4.97 | 2.52 | 1.4E-02 | 3.0E-02 | 5.04  |
| 20_10 | 8063019 | SPINT4          | 15  | 0.39 | 0.22 | 4.71 | 2.73 | 8.1E-03 | 2.0E-02 | 5.61  |
| 20_10 | 8066475 | KCNS1           | 13  | 0.38 | 0.27 | 5.94 | 3.87 | 2.5E-04 | 1.6E-03 | 9.26  |
| 20_10 | 8066637 | FLJ40606        | 5   | 0.38 | 0.16 | 6.81 | 2.37 | 2.1E-02 | 3.9E-02 | 4.70  |
| 20_10 | 8066549 | WFDC8           | 53  | 0.36 | 0.32 | 5.40 | 2.64 | 1.0E-02 | 2.4E-02 | 5.37  |
| 20_10 | 8063078 | CTSA            | 18  | 0.36 | 0.49 | 8.89 | 3.59 | 6.2E-04 | 2.7E-03 | 8.55  |
| 20_10 | 8063129 | SLC12A5         | 21  | 0.35 | 0.19 | 5.88 | 2.37 | 2.0E-02 | 3.9E-02 | 4.70  |
| 20_10 | 8066536 | WFDC6           | 26  | 0.35 | 0.24 | 6.24 | 2.41 | 1.9E-02 | 3.8E-02 | 4.71  |
| 20_10 | 8066489 | WFDC12          | 11  | 0.33 | 0.23 | 6.72 | 2.42 | 1.8E-02 | 3.8E-02 | 4.72  |
| 20_10 | 8066574 | WFDC10B         | 28  | 0.28 | 0.18 | 6.05 | 2.32 | 2.4E-02 | 4.1E-02 | 4.61  |
| 20_10 | 8066579 | WFDC3           | 25  | 0.27 | 0.18 | 6.48 | 2.28 | 2.6E-02 | 4.3E-02 | 4.53  |
| 20_10 | 8066498 | MATN4           | 25  | 0.22 | 0.17 | 6.67 | 2.22 | 3.0E-02 | 4.8E-02 | 4.38  |
| 20_1  | 8065668 | CDK5RAP1        | 30  | 0.60 | 0.34 | 7.24 | 4.72 | 1.1E-05 | 8.6E-05 | 13.51 |
| 20_1  | 8061725 | ASXL1           | 52  | 0.60 | 0.48 | 7.93 | 5.50 | 5.2E-07 | 7.1E-06 | 17.10 |
| 20_1  | 8065596 | PDRG1           | 12  | 0.53 | 0.39 | 6.20 | 5.95 | 8.4E-08 | 3.5E-06 | 18.11 |
| 20_1  | 8061579 | TPX2            | 37  | 0.53 | 1.04 | 7.51 | 5.15 | 2.1E-06 | 1.9E-05 | 15.70 |
| 20_1  | 8065607 | PLAGL2          | 19  | 0.51 | 0.66 | 7.34 | 5.63 | 3.1E-07 | 5.6E-06 | 17.44 |
| 20_1  | 8065637 | COMMD7          | 29  | 0.50 | 0.38 | 7.79 | 4.17 | 8.2E-05 | 5.0E-04 | 10.97 |
| 20_1  | 8061706 | POFUT1          | 28  | 0.49 | 0.55 | 7.70 | 5.84 | 1.3E-07 | 3.5E-06 | 18.11 |
| 20_1  | 8061772 | MAPRE1          | 35  | 0.48 | 0.50 | 9.23 | 4.39 | 3.7E-05 | 2.6E-04 | 11.93 |
| 20_1  | 8061517 | ENST00000390832 | 8   | 0.47 | 0.19 | 3.48 | 2.69 | 8.9E-03 | 1.9E-02 | 5.74  |
| 20_1  | 8065612 | C20orf112       | 66  | 0.45 | 0.33 | 7.08 | 3.57 | 6.4E-04 | 3.2E-03 | 8.30  |
| 20_1  | 8065555 | DEFB119         | 16  | 0.43 | 0.21 | 5.67 | 2.43 | 1.7E-02 | 3.1E-02 | 5.02  |
| 20_1  | 8061685 | TM9SF4          | 32  | 0.42 | 0.59 | 8.40 | 5.43 | 7.0E-07 | 7.6E-06 | 17.00 |
| 20_1  | 8065683 | SNTA1           | 14  | 0.41 | 0.17 | 7.44 | 2.80 | 6.6E-03 | 1.5E-02 | 6.05  |
| 20_1  | 8061509 | DEFB118         | 8   | 0.40 | 0.27 | 5.71 | 3.19 | 2.1E-03 | 7.6E-03 | 7.04  |
| 20_1  | 8061847 | C20orf70        | 31  | 0.38 | 0.22 | 5.92 | 2.61 | 1.1E-02 | 2.2E-02 | 5.49  |
| 20_1  | 8061645 | ---             | 6   | 0.37 | 0.32 | 6.21 | 3.24 | 1.8E-03 | 7.0E-03 | 7.15  |
| 20_1  | 8065633 | ENST00000360170 | 6   | 0.36 | 0.19 | 6.92 | 2.59 | 1.2E-02 | 2.3E-02 | 5.45  |
| 20_1  | 8061504 | DEFB115         | 15  | 0.36 | 0.26 | 5.88 | 3.07 | 3.0E-03 | 8.7E-03 | 6.84  |
| 20_1  | 8061620 | TLL9            | 37  | 0.34 | 0.27 | 6.85 | 2.85 | 5.7E-03 | 1.4E-02 | 6.20  |
| 20_1  | 8061666 | ---             | 7   | 0.33 | 0.24 | 5.88 | 3.11 | 2.7E-03 | 8.6E-03 | 6.86  |
| 20_1  | 8065580 | DUSP15          | 20  | 0.33 | 0.19 | 6.75 | 3.15 | 2.3E-03 | 8.0E-03 | 6.97  |
| 20_1  | 8061859 | RP11-49G10.8    | 27  | 0.32 | 0.25 | 5.44 | 3.30 | 1.5E-03 | 6.3E-03 | 7.30  |
| 20_1  | 8061912 | ENST00000246222 | 24  | 0.30 | 0.31 | 6.44 | 3.53 | 7.1E-04 | 3.2E-03 | 8.27  |
| 20_1  | 8065652 | SPAG4L          | 26  | 0.28 | 0.21 | 5.90 | 2.95 | 4.3E-03 | 1.2E-02 | 6.42  |
| 20_1  | 8061869 | C20orf71        | 29  | 0.28 | 0.23 | 6.42 | 2.38 | 2.0E-02 | 3.4E-02 | 4.88  |
| 20_1  | 8061815 | C20orf185       | 34  | 0.28 | 0.22 | 6.87 | 2.48 | 1.5E-02 | 2.9E-02 | 5.10  |
| 20_1  | 8061746 | DNMT3B          | 50  | 0.28 | 0.30 | 6.69 | 3.09 | 2.8E-03 | 8.6E-03 | 6.86  |
| 20_1  | 8061799 | BPIL3           | 41  | 0.26 | 0.19 | 6.40 | 2.29 | 2.5E-02 | 4.1E-02 | 4.60  |
| 20_1  | 8061605 | MYLK2           | 19  | 0.24 | 0.21 | 6.28 | 2.76 | 7.2E-03 | 1.6E-02 | 5.98  |
| 20_1  | 8061715 | KIF3B           | 36  | 0.24 | 0.32 | 7.50 | 4.12 | 9.7E-05 | 5.3E-04 | 10.87 |
| 20_1  | 8061916 | ENST00000253375 | 17  | 0.23 | 0.16 | 4.74 | 2.47 | 1.6E-02 | 2.9E-02 | 5.10  |
| 20_1  | 8065630 | FLJ33706        | 12  | 0.22 | 0.29 | 5.67 | 2.87 | 5.3E-03 | 1.4E-02 | 6.20  |
| 20_1  | 8061542 | HM13            | 38  | 0.21 | 0.34 | 8.36 | 2.86 | 5.5E-03 | 1.4E-02 | 6.20  |
| 20_1  | 8061883 | PLUNC           | 32  | 0.20 | 0.19 | 6.36 | 2.20 | 3.1E-02 | 5.0E-02 | 4.33  |
