# Supplementary material for: Identification of Candidate Growth Promoting Genes in Ovarian Cancer through Integrated Copy Number and Expression Analysis
Source: PubMed Central journal article supplement (PMC2851616; doi:10.1371/journal.pone.0009983), 2010-04-08
Supplement: pone.0009983.s006.pdf [file pone.0009983.s006.pdf]

| Probeset | P.value  | Pearson correlation (r) | Chr   | Start (bp) | End (bp)  | Frequency of high level amplification | Number of CN probesets | Gene                                                                                                                                                                                                                                       |
|----------|----------|-------------------------|-------|------------|-----------|---------------------------------------|------------------------|--------------------------------------------------------------------------------------------------------------------------------------------------------------------------------------------------------------------------------------------|
| 8152648  | 2.22E-16 | 0.8003                  | chr8  | 124301388  | 124322798 | 5                                     | 28                     | BC012379 // C8orf76 // chromosome 8 open reading frame 76 // 8q24.13 // 84933                                                                                                                                                              |
| 8027566  | 3.49E-14 | 0.7640                  | chr19 | 38556076   | 38565432  | 5                                     | 32                     | NM_001806 // CEBPG // CCAAT/enhancer binding protein (C/EBP)                                                                                                                                                                               |
| 8027439  | 4.77E-14 | 0.7614                  | chr19 | 37528393   | 37570411  | 5                                     | 33                     | NM_014910 // ZNF507 // zinc finger protein 507 // 19q13.11 // 22847 /// ENST00000311921 // ZNF507 // zinc finger protein 507 (ZNF507)                                                                                                      |
| 8035905  | 5.42E-14 | 0.7604                  | chr19 | 37779747   | 37857945  | 5                                     | 34                     | NM_032139 // ANKRD27 // ankyrin repeat domain 27 (VPS9 domain) // 19q13.11 // 84079 /// ENST00000306065 // ANKRD27 // ankyrin repeat domain 27 (VPS9 domain) (ANKRD27)                                                                     |
| 8035886  | 7.53E-14 | 0.7576                  | chr19 | 34881633   | 34898292  | 6                                     | 29                     | NM_031448 // C19orf12 // chromosome 19 open reading frame 12 // 19q12 // 83636 /// NM_001031726 // C19orf12 // chromosome 19 open reading frame 12 // 19q12 // 83636                                                                       |
| 8146618  | 1.41E-13 | 0.7523                  | chr8  | 62363104   | 62576758  | 5                                     | 29                     | ENST00000325897 // RLBP1L1 // hypothetical protein MGC34646 (MGC34646)                                                                                                                                                                     |
| 8006906  | 1.44E-12 | 0.7312                  | chr17 | 35097919   | 35138441  | 5                                     | 43                     | NM_001005862 // ERBB2 // v-erb-b2 erythroblastic leukemia viral oncogene homolog 2                                                                                                                                                         |
| 8152815  | 1.82E-12 | 0.7289                  | chr8  | 129027987  | 129030151 | 7                                     | 25                     | ENST00000328323 // TMEM75 // transmembrane protein 75 (TMEM75)                                                                                                                                                                             |
| 8148313  | 2.04E-12 | 0.7279                  | chr8  | 127752949  | 127753081 | 6                                     | 25                     | ENST00000391149 // ENSEMBL ncRNA // ncrna:snRNA chromosome:NCBI36:8:127752949:127753081:1 gene:ENSG00000212451 // chr8 // 100 // 100 // 25 // 25 // 0                                                                                      |
| 8036010  | 2.56E-12 | 0.7257                  | chr19 | 38569696   | 38704540  | 7                                     | 27                     | NM_000285 // PEPD // peptidase D // 19q12-q13.2 // 5184 /// ENST00000244137 // PEPD // peptidase D (PEPD)                                                                                                                                  |
| 8027390  | 4.46E-12 | 0.7202                  | chr19 | 34789041   | 34798547  | 6                                     | 32                     | NM_006627 // POP4 // processing of precursor 4                                                                                                                                                                                             |
| 8148327  | 9.67E-12 | 0.7123                  | chr8  | 129301932  | 129302259 | 7                                     | 26                     | ENST00000364912 // ENSEMBL ncRNA // ncrna:misc_RNA chromosome:NCBI36:8:129301932:129302259:1 gene:ENSG00000201782 // chr8 // 100 // 77 // 20 // 20 // 0                                                                                    |
| 8148263  | 1.14E-11 | 0.7106                  | chr8  | 125532243  | 125534277 | 5                                     | 26                     | NM_017956 // TRMT12 // tRNA methyltransferase 12 homolog (S. cerevisiae) // 8q24.13 // 55039 /// ENST00000328599 // TRMT12 // tRNA methyltransferase 12 homolog (S. cerevisiae) (TRMT12)                                                   |
| 8146448  | 1.27E-11 | 0.7094                  | chr8  | 55210334   | 55223014  | 5                                     | 22                     | NM_014175 // MRPL15 // mitochondrial ribosomal protein L15 // 8q11.2-q13 // 29088 /// ENST00000260102 // MRPL15 // mitochondrial ribosomal protein L15 (MRPL15)                                                                            |
| 8152096  | 1.73E-11 | 0.7062                  | chr8  | 102000087  | 102034745 | 5                                     | 28                     | NM_145690 // YWHAZ // tyrosine 3-monooxygenase/tryptophan 5-monooxygenase activation protein                                                                                                                                               |
| 8153175  | 4.04E-11 | 0.6970                  | chr8  | 140811770  | 141537860 | 7                                     | 31                     | NM_031466 // NIBP // NIK and IKK(beta) binding protein // 8q24.3 // 83696 /// ENST00000389327 // NIBP // NIK and IKK(beta) binding protein (NIBP)                                                                                          |
| 8152628  | 5.16E-11 | 0.6943                  | chr8  | 124094769  | 124123722 | 5                                     | 31                     | NM_024295 // DERL1 // Der1-like domain family                                                                                                                                                                                              |
| 8027473  | 8.47E-11 | 0.6888                  | chr19 | 37763944   | 37770171  | 5                                     | 16                     | NM_004708 // PDCD5 // programmed cell death 5 // 19q12-q13.1 // 9141 /// ENST00000221784 // PDCD5 // programmed cell death 5 (PDCD5)                                                                                                       |
| 8148198  | 1.33E-10 | 0.6836                  | chr8  | 124498146  | 124523442 | 6                                     | 33                     | AK225643 // C8orf32 // chromosome 8 open reading frame 32 // 8q24.13 // 55093                                                                                                                                                              |
| 8148467  | 1.54E-10 | 0.6818                  | chr8  | 141590586  | 141596434 | 6                                     | 24                     | uc003yvl.1 // CHRAC1 // chromatin accessibility complex 1 // 8q24.3 // 54108                                                                                                                                                               |
| 8027416  | 2.66E-10 | 0.6754                  | chr19 | 35106391   | 35198456  | 6                                     | 34                     | NM_003796 // C19orf2 // chromosome 19 open reading frame 2 // 19q12 // 8725 /// NM_134447 // C19orf2 // chromosome 19 open reading frame 2 // 19q12 // 8725 /// BC026184 // C19orf2 // chromosome 19 open reading frame 2 // 19q12 // 8725 |
| 8148265  | 2.68E-10 | 0.6753                  | chr8  | 125556189  | 125570040 | 5                                     | 31                     | NM_007218 // RNF139 // ring finger protein 139 // 8q24 // 11236                                                                                                                                                                            |
| 8036027  | 4.74E-10 | 0.6683                  | chr19 | 39110149   | 39110370  | 5                                     | 24                     | ---                                                                                                                                                                                                                                        |

|         |          |        |       |           |           |    |    |                                                                                                                                                                                                                                                             |
|---------|----------|--------|-------|-----------|-----------|----|----|-------------------------------------------------------------------------------------------------------------------------------------------------------------------------------------------------------------------------------------------------------------|
| 8153223 | 6.01E-10 | 0.6654 | chr8  | 141737670 | 142080514 | 7  | 37 | NM_153831 // PTK2 // PTK2 protein tyrosine kinase 2 // 8q24-qter // 5747 /// NM_005607 // PTK2 // PTK2 protein tyrosine kinase 2 // 8q24-qter // 5747 /// ENST00000340930 // PTK2 // PTK2 protein tyrosine kinase 2 (PTK2)                                  |
| 8027429 | 9.11E-10 | 0.6602 | chr19 | 35212048  | 35212284  | 5  | 21 | ENST00000361098 // ENSEMBL Transcript // cdna:known chromosome:NCBI36:19:35212048:35212284:1 gene:ENSG00000196986 // na // 100 // 0 // 21 // --- // 0                                                                                                       |
| 8152812 | 1.36E-09 | 0.6551 | chr8  | 127633869 | 127639648 | 6  | 30 | NM_174911 // FAM84B // family with sequence similarity 84                                                                                                                                                                                                   |
| 8151030 | 1.65E-09 | 0.6525 | chr8  | 62706791  | 62707125  | 5  | 25 | ---                                                                                                                                                                                                                                                         |
| 8027482 | 1.68E-09 | 0.6523 | chr19 | 37902519  | 37998370  | 5  | 30 | NM_001015890 // ECAT8 // ES cell associated transcript 8 // 19q13.11 // 91646 /// AB211063 // ECAT8 // ES cell associated transcript 8 // 19q13.11 // 91646 /// ENST00000311695 // ECAT8 // ES cell associated transcript 8 (ECAT8)                         |
| 8148158 | 1.70E-09 | 0.6521 | chr8  | 124154101 | 124233574 | 6  | 28 | NM_145647 // WDR67 // WD repeat domain 67 // 8q24.13 // 93594 /// ENST00000287380 // WDR67 // WD repeat domain 67 (WDR67)                                                                                                                                   |
| 8152750 | 4.21E-09 | 0.6400 | chr8  | 125393412 | 125454110 | 5  | 35 | NM_194291 // TMEM65 // transmembrane protein 65 // 8q24.13 // 157378 /// ENST00000297632 // TMEM65 // transmembrane protein 65 (TMEM65)                                                                                                                     |
| 8027448 | 5.99E-09 | 0.6351 | chr19 | 37588520  | 37668635  | 5  | 45 | NM_207325 // DPY19L3 // dpy-19-like 3 (C. elegans) // 19q13.11 // 147991 /// ENST00000342179 // DPY19L3 // dpy-19-like 3 (C. elegans) (DPY19L3)                                                                                                             |
| 8146456 | 6.84E-09 | 0.6332 | chr8  | 55405800  | 55406008  | 5  | 25 | ---                                                                                                                                                                                                                                                         |
| 8035941 | 8.51E-09 | 0.6302 | chr19 | 38013257  | 38052512  | 4* | 35 | NM_014270 // SLC7A9 // solute carrier family 7 (cationic amino acid transporter)                                                                                                                                                                            |
| 8153043 | 1.71E-08 | 0.6201 | chr8  | 135559213 | 135794463 | 6  | 28 | NM_020863 // ZFAT1 // ZFAT zinc finger 1 // 8q24.22 // 57623 /// NM_001029939 // ZFAT1 // ZFAT zinc finger 1 // 8q24.22 // 57623 /// AB167739 // ZFAT1 // ZFAT zinc finger 1 // 8q24.22 // 57623 /// ENST00000318135 // ZFAT1 // ZFAT zinc finger 1 (ZFAT1) |
| 8148325 | 1.71E-08 | 0.6201 | chr8  | 129080559 | 129080722 | 7  | 25 | ---                                                                                                                                                                                                                                                         |
| 8148280 | 1.95E-08 | 0.6181 | chr8  | 126079901 | 126103707 | 5  | 37 | NM_003129 // SQLE // squalene epoxidase // 8q24.1 // 6713 /// ENST00000265896 // SQLE // squalene epoxidase (SQLE)                                                                                                                                          |
| 8152668 | 2.97E-08 | 0.6118 | chr8  | 124401922 | 124477868 | 6  | 37 | NM_014109 // ATAD2 // ATPase family                                                                                                                                                                                                                         |
| 8027431 | 5.08E-08 | 0.6036 | chr19 | 35555168  | 35740805  | 5  | 25 | NM_014717 // ZNF536 // zinc finger protein 536 // 19q12 // 9745 /// ENST00000355537 // ZNF536 // zinc finger protein 536 (ZNF536)                                                                                                                           |
| 8153328 | 5.60E-08 | 0.6021 | chr8  | 143740950 | 143744942 | 5  | 17 | NM_003724 // JRK // jerky homolog (mouse) // 8q24.3 // 8629 /// NM_001077527 // JRK // jerky homolog (mouse) // 8q24.3 // 8629                                                                                                                              |
| 8148270 | 6.53E-08 | 0.5997 | chr8  | 125620092 | 125631401 | 5  | 16 | NM_005005 // NDUFB9 // NADH dehydrogenase (ubiquinone) 1 beta subcomplex                                                                                                                                                                                    |
| 8148476 | 7.53E-08 | 0.5974 | chr8  | 142207902 | 142275083 | 5  | 37 | NM_014957 // DENND3 // DENN/MADD domain containing 3 // 8q24.3 // 22898 /// ENST00000262585 // DENND3 // DENN/MADD domain containing 3 (DENND3)                                                                                                             |
| 8027402 | 9.06E-08 | 0.5944 | chr19 | 34994741  | 35007059  | 6  | 30 | NM_001238 // CCNE1 // cyclin E1 // 19q12 // 898 /// NM_057182 // CCNE1 // cyclin E1 // 19q12 // 898 /// ENST00000262643 // CCNE1 // cyclin E1 (CCNE1)                                                                                                       |
| 8153304 | 1.18E-07 | 0.5902 | chr8  | 143291348 | 143482444 | 5  | 32 | NM_145003 // TSNARE1 // t-SNARE domain containing 1 // 8q24.3 // 203062 /// ENST00000307180 // TSNARE1 // t-SNARE domain containing 1 (TSNARE1)                                                                                                             |
| 8148315 | 1.66E-07 | 0.5846 | chr8  | 128497039 | 128498637 | 6  | 13 | NR_002304 // POU5F1P1 // POU class 5 homeobox 1 pseudogene 1 // 8q24.21 // 5462                                                                                                                                                                             |

|         |          |        |       |           |           |   |    |                                                                                                                                                                                                                                                                                                                                                                                                                       |
|---------|----------|--------|-------|-----------|-----------|---|----|-----------------------------------------------------------------------------------------------------------------------------------------------------------------------------------------------------------------------------------------------------------------------------------------------------------------------------------------------------------------------------------------------------------------------|
| 8150988 | 1.78E-07 | 0.5834 | chr8  | 62578374  | 62789889  | 5 | 61 | NM_004318 // ASPH // aspartate beta-hydroxylase // 8q12.1 // 444 /// NM_032468 // ASPH // aspartate beta-hydroxylase // 8q12.1 // 444 /// NM_020164 // ASPH // aspartate beta-hydroxylase // 8q12.1 // 444 /// NM_032467 // ASPH // aspartate beta-hydroxylase // 8q12.1 // 444 /// NM_032466 // ASPH // aspartate beta-hydroxylase // 8q12.1 // 444 /// ENST00000389213 // ASPH // aspartate beta-hydroxylase (ASPH) |
| 8148358 | 2.42E-07 | 0.5782 | chr8  | 133856786 | 133930234 | 6 | 53 | NM_016018 // PHF20L1 // PHD finger protein 20-like 1 // 8q24.22 // 51105 /// NM_198513 // PHF20L1 // PHD finger protein 20-like 1 // 8q24.22 // 51105 /// NM_032205 // PHF20L1 // PHD finger protein 20-like 1 // 8q24.22 // 51105 /// ENST00000337920 // PHF20L1 // PHD finger protein 20-like 1 (PHF20L1)                                                                                                           |
| 8148293 | 2.67E-07 | 0.5765 | chr8  | 126173277 | 126448544 | 5 | 33 | NM_173685 // NSMCE2 // non-SMC element 2                                                                                                                                                                                                                                                                                                                                                                              |
| 8153201 | 2.99E-07 | 0.5746 | chr8  | 141610446 | 141714827 | 6 | 30 | NM_012154 // EIF2C2 // eukaryotic translation initiation factor 2C                                                                                                                                                                                                                                                                                                                                                    |
| 8148276 | 3.24E-07 | 0.5732 | chr8  | 126054721 | 126060812 | 5 | 27 | NM_152412 // ZNF572 // zinc finger protein 572 // 8q24.13 // 137209 /// ENST00000319286 // ZNF572 // zinc finger protein 572 (ZNF572)                                                                                                                                                                                                                                                                                 |
| 8146458 | 3.66E-07 | 0.5711 | chr8  | 55495581  | 55495806  | 5 | 18 | ---                                                                                                                                                                                                                                                                                                                                                                                                                   |
| 8027383 | 6.91E-07 | 0.5599 | chr19 | 34184414  | 34184503  | 5 | 25 | ---                                                                                                                                                                                                                                                                                                                                                                                                                   |
| 8148501 | 7.20E-07 | 0.5591 | chr8  | 142501189 | 142510802 | 5 | 28 | NM_032611 // PTP4A3 // protein tyrosine phosphatase type IVA                                                                                                                                                                                                                                                                                                                                                          |
| 8146625 | 7.96E-07 | 0.5573 | chr8  | 63324055  | 64074765  | 5 | 28 | ENST00000328472 // FAM77D // family with sequence similarity 77                                                                                                                                                                                                                                                                                                                                                       |
| 8035880 | 9.10E-07 | 0.5549 | chr19 | 34390007  | 34395954  | 5 | 9  | NM_006003 // UQCRFS1 // ubiquinol-cytochrome c reductase                                                                                                                                                                                                                                                                                                                                                              |
| 8152656 | 9.13E-07 | 0.5548 | chr8  | 124329877 | 124355728 | 5 | 32 | NM_001017926 // ZHX1 // zinc fingers and homeoboxes 1 // 8q24.13 // 11244 /// NM_007222 // ZHX1 // zinc fingers and homeoboxes 1 // 8q24.13 // 11244 /// ENST00000297857 // ZHX1 // zinc fingers and homeoboxes 1 (ZHX1)                                                                                                                                                                                              |
| 8027398 | 9.29E-07 | 0.5545 | chr19 | 34847803  | 34858224  | 6 | 26 | NM_024310 // PLEKHF1 // pleckstrin homology domain containing                                                                                                                                                                                                                                                                                                                                                         |
| 8152900 | 9.63E-07 | 0.5538 | chr8  | 131150964 | 131151080 | 6 | 11 | ENST00000363434 // ENSEMBL ncRNA // ncrna:snRNA chromosome:NCBI36:8:131150969:131151080:-1 gene:ENSG00000200304 // chr8 // 100 // 100 // 11 // 11 // 0                                                                                                                                                                                                                                                                |
| 8148208 | 1.21E-06 | 0.5496 | chr8  | 124849884 | 124896873 | 5 | 11 | NM_144963 // FAM91A1 // family with sequence similarity 91                                                                                                                                                                                                                                                                                                                                                            |
| 8148184 | 1.59E-06 | 0.5445 | chr8  | 124261580 | 124291499 | 5 | 28 | NM_207006 // FAM83A // family with sequence similarity 83                                                                                                                                                                                                                                                                                                                                                             |
| 8152782 | 1.97E-06 | 0.5404 | chr8  | 126105690 | 126173191 | 5 | 35 | NM_014846 // KIAA0196 // KIAA0196 // 8q24.13 // 9897 /// ENST00000318410 // KIAA0196 // KIAA0196 (KIAA0196)                                                                                                                                                                                                                                                                                                           |
| 8027564 | 2.24E-06 | 0.5379 | chr19 | 38485617  | 38487800  | 5 | 25 | BC027959 // FLJ12355 // hypothetical protein FLJ12355 // 19q13.11 // 80054                                                                                                                                                                                                                                                                                                                                            |
| 8035896 | 2.70E-06 | 0.5342 | chr19 | 36457691  | 36531984  | 6 | 24 | NM_020856 // TSHZ3 // teashirt zinc finger homeobox 3 // 19q12 // 57616 /// ENST00000240587 // TSHZ3 // teashirt family zinc finger 3 (TSHZ3)                                                                                                                                                                                                                                                                         |
| 8152666 | 2.79E-06 | 0.5336 | chr8  | 124348065 | 124348166 | 5 | 25 | ---                                                                                                                                                                                                                                                                                                                                                                                                                   |
| 8148515 | 3.81E-06 | 0.5274 | chr8  | 142526758 | 142526831 | 5 | 25 | ---                                                                                                                                                                                                                                                                                                                                                                                                                   |
| 8152664 | 3.90E-06 | 0.5270 | chr8  | 124339906 | 124339978 | 5 | 25 | ---                                                                                                                                                                                                                                                                                                                                                                                                                   |
| 8061579 | 4.70E-06 | 0.5232 | chr20 | 29790565  | 29853264  | 5 | 28 | NM_012112 // TPX2 // TPX2                                                                                                                                                                                                                                                                                                                                                                                             |
| 8027584 | 5.92E-06 | 0.5185 | chr19 | 38979607  | 38996988  | 5 | 24 | NM_024076 // KCTD15 // potassium channel tetramerisation domain containing 15 // 19q13.11 // 79047 /// ENST00000284006 // KCTD15 // potassium channel tetramerisation domain containing 15 (KCTD15)                                                                                                                                                                                                                   |
| 8152759 | 1.24E-05 | 0.5029 | chr8  | 125569930 | 125620510 | 5 | 9  | NM_032026 // TATDN1 // TatD DNase domain containing 1 // 8q24.13 // 83940 /// ENST00000276692 // TATDN1 // TatD DNase domain containing 1 (TATDN1)                                                                                                                                                                                                                                                                    |

|         |          |        |       |           |           |   |    |                                                                                                                                                                                                                                                                          |
|---------|----------|--------|-------|-----------|-----------|---|----|--------------------------------------------------------------------------------------------------------------------------------------------------------------------------------------------------------------------------------------------------------------------------|
| 8148559 | 1.32E-05 | 0.5015 | chr8  | 143805623 | 143815352 | 5 | 33 | NM_016647 // C8orf55 // chromosome 8 open reading frame 55 // 8q24.3 // 51337 /// AK055140 // C8orf55 // chromosome 8 open reading frame 55 // 8q24.3 // 51337                                                                                                           |
| 8152703 | 1.56E-05 | 0.4979 | chr8  | 124584539 | 124622627 | 6 | 28 | NM_058229 // FBXO32 // F-box protein 32 // 8q24.13 // 114907 /// NM_148177 // FBXO32 // F-box protein 32 // 8q24.13 // 114907 /// ENST00000287396 // FBXO32 // F-box protein 32 (FBXO32)                                                                                 |
| 8146460 | 2.05E-05 | 0.4919 | chr8  | 55496033  | 55496120  | 5 | 25 | ---                                                                                                                                                                                                                                                                      |
| 8027437 | 3.27E-05 | 0.4812 | chr19 | 36332202  | 36332597  | 5 | 4  | ---                                                                                                                                                                                                                                                                      |
| 8092201 | 3.30E-05 | 0.4810 | chr3  | 178221236 | 178397734 | 5 | 18 | NM_024665 // TBL1XR1 // transducin (beta)-like 1X-linked receptor 1 // 3q26.32 // 79718 /// ENST00000314694 // TBL1XR1 // transducin (beta)-like 1X-linked receptor 1 (TBL1XR1)                                                                                          |
| 8148385 | 3.56E-05 | 0.4792 | chr8  | 133948387 | 134216340 | 6 | 62 | NM_003235 // TG // thyroglobulin // 8q24 // 7038 /// ENST00000220616 // TG // thyroglobulin (TG)                                                                                                                                                                         |
| 8152845 | 4.88E-05 | 0.4718 | chr8  | 130922898 | 131097829 | 6 | 37 | ENST00000358017 // FAM49B // family with sequence similarity 49                                                                                                                                                                                                          |
| 8027480 | 5.80E-05 | 0.4676 | chr19 | 37858153  | 37861046  | 5 | 18 | NM_207391 // RGS9BP // regulator of G protein signaling 9 binding protein // 19q13.11 // 388531 /// ENST00000334176 // RGS9BP // regulator of G protein signalling 9 binding protein (RGS9BP)                                                                            |
| 8084016 | 5.94E-05 | 0.4670 | chr3  | 180349005 | 180435616 | 5 | 37 | NM_006218 // PIK3CA // phosphoinositide-3-kinase                                                                                                                                                                                                                         |
| 8148149 | 6.99E-05 | 0.4631 | chr8  | 123863082 | 124055936 | 5 | 28 | NM_014943 // ZHX2 // zinc fingers and homeoboxes 2 // 8q24.13 // 22882 /// ENST00000314393 // ZHX2 // zinc fingers and homeoboxes 2 (ZHX2)                                                                                                                               |
| 8152867 | 7.11E-05 | 0.4627 | chr8  | 131133535 | 131483399 | 6 | 41 | NM_018482 // DDEF1 // development and differentiation enhancing factor 1 // 8q24.1-q24.2 // 50807 /// ENST00000357668 // DDEF1 // development and differentiation enhancing factor 1 (DDEF1)                                                                             |
| 8035993 | 7.84E-05 | 0.4603 | chr19 | 38391410  | 38408596  | 5 | 28 | NM_019849 // SLC7A10 // solute carrier family 7                                                                                                                                                                                                                          |
| 8061517 | 0.000104 | 0.4532 | chr20 | 29427783  | 29427911  | 5 | 25 | ENST00000390832 // ENSEMBL ncRNA // ncRNA:snRNA chromosome:NCBI36:20:29427783:29427910:1 gene:ENSG00000212134 // chr20 // 100 // 96 // 24 // 24 // 0                                                                                                                     |
| 8148435 | 0.000137 | 0.4462 | chr8  | 134272494 | 134310753 | 6 | 30 | NM_003882 // WISP1 // WNT1 inducible signaling pathway protein 1 // 8q24.1-q24.3 // 8840 /// NM_080838 // WISP1 // WNT1 inducible signaling pathway protein 1 // 8q24.1-q24.3 // 8840 /// ENST00000250160 // WISP1 // WNT1 inducible signaling pathway protein 1 (WISP1) |
| 8065555 | 0.000209 | 0.4351 | chr20 | 29428628  | 29442067  | 5 | 27 | NM_173460 // DEFB119 // defensin                                                                                                                                                                                                                                         |
| 8152828 | 0.000255 | 0.4298 | chr8  | 130829624 | 130868316 | 6 | 38 | NM_031415 // MLZE // melanoma-derived leucine zipper                                                                                                                                                                                                                     |
| 8148333 | 0.000378 | 0.4189 | chr8  | 132985549 | 133094956 | 6 | 27 | ENST00000254624 // KIAA0143 // KIAA0143 protein (KIAA0143)                                                                                                                                                                                                               |
| 8027556 | 0.000492 | 0.4114 | chr19 | 38377330  | 38390386  | 5 | 24 | NM_002333 // LRP3 // low density lipoprotein receptor-related protein 3 // 19q13.11 // 4037 /// ENST00000253193 // LRP3 // low density lipoprotein receptor-related protein 3 (LRP3)                                                                                     |
| 8152865 | 0.000514 | 0.4101 | chr8  | 130956698 | 130959352 | 6 | 20 | AB062477 // GenBank // Homo sapiens OK/SW-cl.41 mRNA                                                                                                                                                                                                                     |
| 8148448 | 0.000539 | 0.4087 | chr8  | 136538884 | 136729035 | 7 | 33 | NM_006558 // KHDRBS3 // KH domain containing                                                                                                                                                                                                                             |
| 8148553 | 0.000541 | 0.4087 | chr8  | 143778533 | 143782613 | 5 | 29 | NM_017527 // LY6K // lymphocyte antigen 6 complex                                                                                                                                                                                                                        |
| 8153258 | 0.00057  | 0.4071 | chr8  | 142286455 | 142287964 | 5 | 6  | ENST00000377746 // ENSEMBL Transcript // cdna:known chromosome:NCBI36:8:142286845:142287423:-1 gene:ENSG00000204886 // chr8 // 100 // 50 // 3 // 3 // 0                                                                                                                  |
| 8153002 | 0.000757 | 0.3988 | chr8  | 134318596 | 134379011 | 6 | 45 | NM_006096 // NDRG1 // N-myc downstream regulated gene 1 // 8q24.3 // 10397 /// ENST00000388848 // NDRG1 // N-myc downstream regulated gene 1 (NDRG1)                                                                                                                     |
| 8152821 | 0.000842 | 0.3955 | chr8  | 130433122 | 130761667 | 7 | 28 | BC070152 // CCDC26 // coiled-coil domain containing 26 // 8q24.21 // 137196 /// BC026098 // CCDC26 // coiled-coil domain containing 26 // 8q24.21 // 137196                                                                                                              |
| 8153262 | 0.000866 | 0.3947 | chr8  | 142290052 | 142307855 | 6 | 18 | NM_001080431 // SLC45A4 // solute carrier family 45                                                                                                                                                                                                                      |

|         |          |        |       |           |           |    |    |                                                                                                                                                                                                                                                                                                                                                                            |
|---------|----------|--------|-------|-----------|-----------|----|----|----------------------------------------------------------------------------------------------------------------------------------------------------------------------------------------------------------------------------------------------------------------------------------------------------------------------------------------------------------------------------|
| 8152863 | 0.000925 | 0.3927 | chr8  | 130950018 | 130950144 | 6  | 25 | ENST00000363205 // ENSEMBL ncRNA // ncrna:snoRNA chromosome:NCBI36:8:130950018:130950144:-1<br>gene:ENSG00000200075 // chr8 // 100 // 100 // 25 // 25 // 0                                                                                                                                                                                                                 |
| 8061509 | 0.000941 | 0.3922 | chr20 | 29420082  | 29425364  | 4* | 29 | NM_054112 // DEFB118 // defensin                                                                                                                                                                                                                                                                                                                                           |
| 8148302 | 0.000951 | 0.3919 | chr8  | 126352028 | 126352326 | 5  | 21 | ---                                                                                                                                                                                                                                                                                                                                                                        |
| 8152946 | 0.000997 | 0.3904 | chr8  | 133210438 | 133562186 | 6  | 36 | NM_004519 // KCNQ3 // potassium voltage-gated channel                                                                                                                                                                                                                                                                                                                      |
| 8152924 | 0.001153 | 0.3859 | chr8  | 133105910 | 133136455 | 6  | 30 | NM_001080399 // OC90 // otoconin 90 // 8q24.22 // 729330 /// ENST00000254627 // OC90 // otoconin 90 (OC90)                                                                                                                                                                                                                                                                 |
| 8153067 | 0.001215 | 0.3843 | chr8  | 135886301 | 135886370 | 6  | 21 | hsa-mir-30d // miRBase Micro RNA Database // MI0000255 Homo sapiens miR-30d stem-loop // chr8 // 100 // 100 // 21 // 21 // 0                                                                                                                                                                                                                                               |
| 8153069 | 0.00125  | 0.3834 | chr8  | 136823743 | 136823920 | 6  | 21 | ---                                                                                                                                                                                                                                                                                                                                                                        |
| 8153021 | 0.001326 | 0.3815 | chr8  | 134540312 | 134653349 | 6  | 27 | NM_003033 // ST3GAL1 // ST3 beta-galactoside alpha-2                                                                                                                                                                                                                                                                                                                       |
| 8148329 | 0.00141  | 0.3796 | chr8  | 130372411 | 130372654 | 7  | 25 | ---                                                                                                                                                                                                                                                                                                                                                                        |
| 8153346 | 0.001785 | 0.3720 | chr8  | 143842758 | 143856642 | 5  | 44 | NM_023946 // LYNX1 // Ly6/neurotoxin 1 // 8q24.3 // 66004 /// NM_177457 // LYNX1 // Ly6/neurotoxin 1 // 8q24.3 // 66004 /// NM_177477 // LYNX1 // Ly6/neurotoxin 1 // 8q24.3 // 66004 /// NM_177476 // LYNX1 // Ly6/neurotoxin 1 // 8q24.3 // 66004 /// NM_177458 // LYNX1 // Ly6/neurotoxin 1 // 8q24.3 // 66004 /// ENST00000345173 // LYNX1 // Ly6/neurotoxin 1 (LYNX1) |
| 8148194 | 0.001848 | 0.3709 | chr8  | 124344264 | 124344352 | 5  | 25 | ENST00000390925 // ENSEMBL ncRNA // ncrna:snRNA chromosome:NCBI36:8:124344264:124344370:1<br>gene:ENSG00000212227 // chr8 // 100 // 96 // 24 // 24 // 0                                                                                                                                                                                                                    |
| 8036025 | 0.001948 | 0.3692 | chr19 | 38771952  | 38772443  | 5  | 24 | ENST00000310822 // ENSEMBL Transcript // cdna:known chromosome:NCBI36:19:38771952:38772443:-1<br>gene:ENSG00000173772 // chr19 // 100 // 100 // 24 // 24 // 0                                                                                                                                                                                                              |
| 8153363 | 0.001956 | 0.3690 | chr8  | 143950775 | 143958238 | 5  | 23 | NM_000497 // CYP11B1 // cytochrome P450                                                                                                                                                                                                                                                                                                                                    |
| 8148461 | 0.001982 | 0.3686 | chr8  | 140189855 | 140189978 | 5  | 25 | ---                                                                                                                                                                                                                                                                                                                                                                        |
| 8153101 | 0.002541 | 0.3603 | chr8  | 139669660 | 139995418 | 5  | 69 | NM_152888 // COL22A1 // collagen                                                                                                                                                                                                                                                                                                                                           |
| 8152626 | 0.002605 | 0.3595 | chr8  | 123955490 | 123955596 | 5  | 25 | ---                                                                                                                                                                                                                                                                                                                                                                        |
| 8035935 | 0.002709 | 0.3582 | chr19 | 37791083  | 37791215  | 5  | 23 | ENST00000364518 // ENSEMBL ncRNA // ncrna:snoRNA chromosome:NCBI36:19:37791083:37791215:-1<br>gene:ENSG00000201388 // chr19 // 100 // 100 // 23 // 23 // 0                                                                                                                                                                                                                 |
| 8153071 | 0.003503 | 0.3493 | chr8  | 139211448 | 139578247 | 5  | 61 | NM_015912 // FAM135B // family with sequence similarity 135                                                                                                                                                                                                                                                                                                                |
| 8148465 | 0.003557 | 0.3488 | chr8  | 141375899 | 141376162 | 6  | 25 | ENST00000323118 // ENSEMBL Transcript // cdna:known chromosome:NCBI36:8:141375899:141376162:1<br>gene:ENSG00000179503 // chr8 // 100 // 100 // 25 // 25 // 0                                                                                                                                                                                                               |
| 8061529 | 0.003642 | 0.3480 | chr20 | 29526766  | 29536369  | 5  | 26 | NM_014012 // REM1 // RAS (RAD and GEM)-like GTP-binding 1 // 20q11.21 // 28954 /// ENST00000201979 // REM1 // RAS (RAD and GEM)-like GTP-binding 1 (REM1)                                                                                                                                                                                                                  |
| 8152962 | 0.003938 | 0.3452 | chr8  | 133653629 | 133756995 | 6  | 28 | NM_012472 // LRR6 // leucine rich repeat containing 6 // 8q24.22 // 23639 /// ENST00000250173 // LRR6 // leucine rich repeat containing 6 (LRR6)                                                                                                                                                                                                                           |
| 8148156 | 0.00416  | 0.3433 | chr8  | 124126138 | 124126231 | 5  | 4  | ---                                                                                                                                                                                                                                                                                                                                                                        |
| 8153167 | 0.004714 | 0.3388 | chr8  | 140693986 | 140784481 | 5  | 26 | NM_016601 // KCNK9 // potassium channel                                                                                                                                                                                                                                                                                                                                    |
| 8152819 | 0.005012 | 0.3366 | chr8  | 129091903 | 129092039 | 7  | 26 | ---                                                                                                                                                                                                                                                                                                                                                                        |

|         |          |        |       |           |           |    |    |                                                                                                                                                                                                                                                                       |
|---------|----------|--------|-------|-----------|-----------|----|----|-----------------------------------------------------------------------------------------------------------------------------------------------------------------------------------------------------------------------------------------------------------------------|
| 8065563 | 0.005677 | 0.3320 | chr20 | 29456361  | 29464107  | 5  | 26 | NM_001011878 // DEFB121 // defensin                                                                                                                                                                                                                                   |
| 8148463 | 0.006206 | 0.3287 | chr8  | 141012598 | 141015362 | 5  | 25 | AF220264 // C8orf17 // chromosome 8 open reading frame 17 // 8q24.3 // 56988                                                                                                                                                                                          |
| 8152988 | 0.006649 | 0.3261 | chr8  | 134118155 | 134184479 | 6  | 26 | NM_001045556 // SLA // Src-like-adaptor // 8q22.3-qter 8q24 // 6503 /// NM_006748 // SLA // Src-like-adaptor // 8q22.3-qter 8q24 // 6503 /// NM_001045557 // SLA // Src-like-adaptor // 8q22.3-qter 8q24 // 6503 /// ENST00000338087 // SLA // Src-like-adaptor (SLA) |
| 8153035 | 0.007167 | 0.3233 | chr8  | 134726022 | 134726150 | 6  | 22 | ENST00000390971 // ENSEMBL ncRNA // ncrna:snoRNA chromosome:NCBI36:8:134726023:134726150:-1 gene:ENSG00000212273 // chr8 // 100 // 95 // 21 // 21 // 0                                                                                                                |
| 8153041 | 0.007615 | 0.3210 | chr8  | 134837126 | 134837192 | 6  | 12 | ENST00000385766 // ENSEMBL ncRNA // ncrna:Mt_tRNA_pseudogene chromosome:NCBI36:8:134837126:134837192:-1 gene:ENSG00000208501 // chr8 // 100 // 92 // 11 // 11 // 0                                                                                                    |
| 8148565 | 0.007766 | 0.3202 | chr8  | 143913219 | 143925264 | 5  | 29 | NM_002066 // GML // GPI anchored molecule like protein // 8q24.3 // 2765 /// ENST00000220940 // GML // GPI anchored molecule like protein (GML)                                                                                                                       |
| 8148304 | 0.009136 | 0.3139 | chr8  | 126511745 | 126519827 | 5  | 28 | NM_025195 // TRIB1 // tribbles homolog 1 (Drosophila) // 8q24.13 // 10221 /// ENST00000311922 // TRIB1 // tribbles homolog 1 (Drosophila) (TRIB1)                                                                                                                     |
| 8147689 | 0.010637 | 0.3079 | chr8  | 102039330 | 102039584 | 5  | 24 | ---                                                                                                                                                                                                                                                                   |
| 8035939 | 0.010709 | 0.3076 | chr19 | 37837829  | 37838054  | 5  | 22 | ---                                                                                                                                                                                                                                                                   |
| 8092239 | 0.011077 | 0.3063 | chr3  | 180369567 | 180369692 | 4* | 25 | ENST00000365087 // ENSEMBL ncRNA // ncrna:snoRNA chromosome:NCBI36:3:180369567:180369692:-1 gene:ENSG00000201957 // chr3 // 100 // 100 // 25 // 25 // 0                                                                                                               |
| 8152642 | 0.011141 | 0.3061 | chr8  | 124282593 | 124284164 | 5  | 29 | AY225521 // GenBank // Homo sapiens HCC-related HCC-C11_v3 mRNA                                                                                                                                                                                                       |
| 8148309 | 0.012296 | 0.3021 | chr8  | 126982377 | 126982480 | 6  | 25 | ---                                                                                                                                                                                                                                                                   |
| 8148548 | 0.01298  | 0.2999 | chr8  | 143758877 | 143761145 | 5  | 26 | NM_005672 // PSCA // prostate stem cell antigen // 8q24.2 // 8000 /// AF043498 // PSCA // prostate stem cell antigen // 8q24.2 // 8000 /// ENST00000301258 // PSCA // prostate stem cell antigen (PSCA)                                                               |
| 8152734 | 0.014883 | 0.2942 | chr8  | 125065559 | 125122204 | 5  | 25 | AK093040 // C8orf54 // chromosome 8 open reading frame 54 // 8q24.13 // 439941                                                                                                                                                                                        |
| 8152742 | 0.015467 | 0.2926 | chr8  | 125127495 | 125252944 | 5  | 27 | AK057332 // C8orf78 // chromosome 8 open reading frame 78 // 8q24.13 // 157376                                                                                                                                                                                        |
| 8152640 | 0.015937 | 0.2913 | chr8  | 124261731 | 124261945 | 5  | 24 | ---                                                                                                                                                                                                                                                                   |
| 8152922 | 0.016854 | 0.2890 | chr8  | 132514205 | 132514384 | 6  | 25 | ENST00000362726 // ENSEMBL ncRNA // ncrna:snoRNA chromosome:NCBI36:8:132514205:132514384:-1 gene:ENSG00000199596 // chr8 // 100 // 100 // 25 // 25 // 0                                                                                                               |
| 8153273 | 0.027568 | 0.2673 | chr8  | 142513114 | 142586512 | 5  | 37 | NM_207414 // FLJ43860 // FLJ43860 protein // 8q24.3 // 389690 /// AK131461 // FLJ43860 // FLJ43860 protein // 8q24.3 // 389690                                                                                                                                        |
| 8152764 | 0.028749 | 0.2653 | chr8  | 125632212 | 125809840 | 5  | 29 | NM_014751 // MTSS1 // metastasis suppressor 1 // 8p22 // 9788 /// ENST00000325064 // MTSS1 // metastasis suppressor 1 (MTSS1)                                                                                                                                         |
| 8061519 | 0.029656 | 0.2639 | chr20 | 29492014  | 29501721  | 5  | 27 | NM_153324 // DEFB123 // defensin                                                                                                                                                                                                                                      |
| 8152938 | 0.029756 | 0.2638 | chr8  | 133145214 | 133162535 | 6  | 34 | ENST00000262283 // ENSEMBL Transcript // HERV-H LTR-associating 1 (HHLA1)                                                                                                                                                                                             |
| 8152715 | 0.031193 | 0.2616 | chr8  | 124727160 | 124734347 | 5  | 28 | ENST00000325995 // ENSEMBL Transcript // hypothetical protein LOC340359 (C8ORFK36)                                                                                                                                                                                    |
| 8148474 | 0.0337   | 0.2579 | chr8  | 142019832 | 142019945 | 6  | 25 | ---                                                                                                                                                                                                                                                                   |

|         |          |        |       |           |           |   |    |                                                                                                                                                                                                                                                                                                                                                                                          |
|---------|----------|--------|-------|-----------|-----------|---|----|------------------------------------------------------------------------------------------------------------------------------------------------------------------------------------------------------------------------------------------------------------------------------------------------------------------------------------------------------------------------------------------|
| 8027385 | 0.033819 | 0.2578 | chr19 | 34709331  | 34713045  | 6 | 21 | ENST00000335523 // ENSEMBL Transcript // cdna:known chromosome:NCBI36:19:34709331:34713045:1<br>gene:ENSG00000187135 // chr19 // 100 // 100 // 21 // 21 // 0                                                                                                                                                                                                                             |
| 8092220 | 0.035943 | 0.2549 | chr3  | 178326499 | 178326602 | 5 | 24 | ---                                                                                                                                                                                                                                                                                                                                                                                      |
| 8152976 | 0.038544 | 0.2515 | chr8  | 133791373 | 133842010 | 6 | 32 | ENST00000356838 // TMEM71 // transmembrane protein 71 (TMEM71)                                                                                                                                                                                                                                                                                                                           |
| 8027574 | 0.039631 | 0.2502 | chr19 | 38804717  | 38956254  | 5 | 36 | NM_022467 // CHST8 // carbohydrate (N-acetylgalactosamine 4-0) sulfotransferase 8 // 19q13.1 // 64377 ///<br>ENST00000262622 // CHST8 // carbohydrate (N-acetylgalactosamine 4-0) sulfotransferase 8 (CHST8)                                                                                                                                                                             |
| 8150842 | 0.040555 | 0.2491 | chr8  | 55266694  | 55267149  | 5 | 25 | ENST00000331419 // ENSEMBL Transcript // cdna:known chromosome:NCBI36:8:55266694:55267149:-1<br>gene:ENSG00000182699 // chr8 // 100 // 100 // 25 // 25 // 0                                                                                                                                                                                                                              |
| 8148196 | 0.052934 | 0.2358 | chr8  | 124423835 | 124423903 | 6 | 15 | ---                                                                                                                                                                                                                                                                                                                                                                                      |
| 8065569 | 0.05883  | 0.2303 | chr20 | 29715916  | 29774366  | 5 | 26 | NM_138578 // BCL2L1 // BCL2-like 1 // 20q11.21 // 598 /// NM_001191 // BCL2L1 // BCL2-like 1 // 20q11.21 //<br>598 /// ENST00000376055 // BCL2L1 // BCL2-like 1 (BCL2L1)                                                                                                                                                                                                                 |
| 8092218 | 0.059201 | 0.2300 | chr3  | 178321175 | 178321282 | 5 | 25 | ---                                                                                                                                                                                                                                                                                                                                                                                      |
| 8153320 | 0.061632 | 0.2279 | chr8  | 143326852 | 143327134 | 5 | 22 | ---                                                                                                                                                                                                                                                                                                                                                                                      |
| 8148261 | 0.065211 | 0.2249 | chr8  | 125342068 | 125342174 | 5 | 24 | ---                                                                                                                                                                                                                                                                                                                                                                                      |
| 8061539 | 0.066441 | 0.2239 | chr20 | 29537334  | 29538662  | 5 | 23 | ENST00000278994 // ENSEMBL Transcript // cdna:novel chromosome:NCBI36:20:29537334:29538662:1<br>gene:ENSG00000149611 // chr20 // 100 // 100 // 23 // 23 // 0                                                                                                                                                                                                                             |
| 8148317 | 0.067117 | 0.2234 | chr8  | 128817498 | 128822856 | 6 | 26 | NM_002467 // MYC // v-myc myelocytomatosis viral oncogene homolog (avian) // 8q24.21 // 4609 ///<br>ENST00000377970 // MYC // v-myc myelocytomatosis viral oncogene homolog (avian) (MYC)                                                                                                                                                                                                |
| 8152701 | 0.069215 | 0.2217 | chr8  | 124536398 | 124536528 | 6 | 14 | ---                                                                                                                                                                                                                                                                                                                                                                                      |
| 8148331 | 0.074763 | 0.2175 | chr8  | 131816260 | 131816330 | 6 | 4  | ---                                                                                                                                                                                                                                                                                                                                                                                      |
| 8153065 | 0.076589 | 0.2162 | chr8  | 135881945 | 135882032 | 6 | 22 | hsa-mir-30b // miRBase Micro RNA Database // MI0000441 Homo sapiens miR-30b stem-loop // chr8 // 100 //<br>100 // 22 // 22 // 0                                                                                                                                                                                                                                                          |
| 8061542 | 0.082478 | 0.2121 | chr20 | 29565892  | 29621031  | 5 | 47 | NM_178580 // HM13 // histocompatibility (minor) 13 // 20q11.21 // 81502 /// NM_178581 // HM13 //<br>histocompatibility (minor) 13 // 20q11.21 // 81502 /// NM_030789 // HM13 // histocompatibility (minor) 13 //<br>20q11.21 // 81502 /// NM_178582 // HM13 // histocompatibility (minor) 13 // 20q11.21 // 81502 ///<br>ENST00000335574 // HM13 // histocompatibility (minor) 13 (HM13) |
| 8061572 | 0.086416 | 0.2095 | chr20 | 29689352  | 29696470  | 5 | 28 | NM_032609 // COX4I2 // cytochrome c oxidase subunit IV isoform 2 (lung) // 20q11.21 // 84701 ///<br>ENST00000376075 // COX4I2 // cytochrome c oxidase subunit IV isoform 2 (lung) (COX4I2)                                                                                                                                                                                               |
| 8065566 | 0.095648 | 0.2037 | chr20 | 29516970  | 29524477  | 5 | 26 | NM_001037500 // DEFB124 // defensin                                                                                                                                                                                                                                                                                                                                                      |
| 8153336 | 0.096091 | 0.2035 | chr8  | 143819364 | 143820831 | 5 | 28 | NM_020427 // SLURP1 // secreted LY6/PLAUR domain containing 1 // 8q24.3 // 57152 /// ENST00000246515<br>// SLURP1 // secreted LY6/PLAUR domain containing 1 (SLURP1)                                                                                                                                                                                                                     |
| 8148517 | 0.10604  | 0.1977 | chr8  | 143542379 | 143623370 | 5 | 43 | NM_001702 // BAI1 // brain-specific angiogenesis inhibitor 1 // 8q24 // 575 /// ENST00000323289 // BAI1 //<br>brain-specific angiogenesis inhibitor 1 (BAI1)                                                                                                                                                                                                                             |
| 8153269 | 0.111899 | 0.1945 | chr8  | 142435767 | 142446547 | 5 | 22 | NM_005293 // GPR20 // G protein-coupled receptor 20 // 8q24.2-q24.3 // 2843 /// ENST00000377741 // GPR20<br>// G protein-coupled receptor 20 (GPR20)                                                                                                                                                                                                                                     |
| 8035884 | 0.118294 | 0.1912 | chr19 | 34415837  | 34416132  | 5 | 25 | ---                                                                                                                                                                                                                                                                                                                                                                                      |
| 8153334 | 0.127943 | 0.1864 | chr8  | 143759705 | 143760100 | 5 | 24 | AK092432 // PSCA // prostate stem cell antigen // 8q24.2 // 8000                                                                                                                                                                                                                                                                                                                         |

|         |          |         |       |           |           |    |    |                                                                                                                                                                                                                                                                                                                                                                                                                                                                                                                                                                                                                                                                                                                                                                                                                                                                                                                                                                                                                                              |
|---------|----------|---------|-------|-----------|-----------|----|----|----------------------------------------------------------------------------------------------------------------------------------------------------------------------------------------------------------------------------------------------------------------------------------------------------------------------------------------------------------------------------------------------------------------------------------------------------------------------------------------------------------------------------------------------------------------------------------------------------------------------------------------------------------------------------------------------------------------------------------------------------------------------------------------------------------------------------------------------------------------------------------------------------------------------------------------------------------------------------------------------------------------------------------------------|
| 8146462 | 0.128227 | 0.1863  | chr8  | 55533048  | 55535517  | 4* | 27 | NM_022454 // SOX17 // SRY (sex determining region Y)-box 17 // 8q11.23 // 64321 /// ENST00000297316 // SOX17 // SRY (sex determining region Y)-box 17 (SOX17)                                                                                                                                                                                                                                                                                                                                                                                                                                                                                                                                                                                                                                                                                                                                                                                                                                                                                |
| 8148206 | 0.131244 | 0.1849  | chr8  | 124663658 | 124663728 | 6  | 25 | ---                                                                                                                                                                                                                                                                                                                                                                                                                                                                                                                                                                                                                                                                                                                                                                                                                                                                                                                                                                                                                                          |
| 8153037 | 0.158618 | 0.1729  | chr8  | 134836956 | 134837024 | 6  | 24 | ENST00000385768 // ENSEMBL ncRNA // ncrna:Mt_tRNA_pseudogene<br>chromosome:NCBI36:8:134836956:134837024:-1 gene:ENSG00000208503 // chr8 // 100 // 100 // 24 // 24 // 0                                                                                                                                                                                                                                                                                                                                                                                                                                                                                                                                                                                                                                                                                                                                                                                                                                                                       |
| 8152902 | 0.178472 | 0.1651  | chr8  | 131861729 | 132123854 | 6  | 29 | NM_0011115 // ADCY8 // adenylate cyclase 8 (brain) // 8q24 // 114 /// ENST00000286355 // ADCY8 // adenylate cyclase 8 (brain) (ADCY8)                                                                                                                                                                                                                                                                                                                                                                                                                                                                                                                                                                                                                                                                                                                                                                                                                                                                                                        |
| 8061562 | 0.191005 | 0.1605  | chr20 | 29632553  | 29632668  | 5  | 24 | ---                                                                                                                                                                                                                                                                                                                                                                                                                                                                                                                                                                                                                                                                                                                                                                                                                                                                                                                                                                                                                                          |
| 8153359 | 0.211829 | 0.1534  | chr8  | 143863300 | 143865010 | 5  | 27 | NM_003695 // LY6D // lymphocyte antigen 6 complex                                                                                                                                                                                                                                                                                                                                                                                                                                                                                                                                                                                                                                                                                                                                                                                                                                                                                                                                                                                            |
| 8153342 | 0.212389 | 0.1532  | chr8  | 143828630 | 143830954 | 5  | 27 | NM_205545 // LYPD2 // LY6/PLAUR domain containing 2 // 8q24.3 // 137797 /// ENST00000359228 // LYPD2 // LY6/PLAUR domain containing 2 (LYPD2)                                                                                                                                                                                                                                                                                                                                                                                                                                                                                                                                                                                                                                                                                                                                                                                                                                                                                                |
| 8027414 | 0.222079 | 0.1500  | chr19 | 35103929  | 35104399  | 6  | 21 | ENST00000355049 // ENSEMBL Transcript // similar to peptidylprolyl isomerase A isoform 1 (LOC126170)                                                                                                                                                                                                                                                                                                                                                                                                                                                                                                                                                                                                                                                                                                                                                                                                                                                                                                                                         |
| 8035937 | 0.268652 | 0.1360  | chr19 | 37837423  | 37837691  | 5  | 17 | ---                                                                                                                                                                                                                                                                                                                                                                                                                                                                                                                                                                                                                                                                                                                                                                                                                                                                                                                                                                                                                                          |
| 8153373 | 0.360995 | 0.1125  | chr8  | 143988977 | 143996261 | 5  | 24 | NM_000498 // CYP11B2 // cytochrome P450                                                                                                                                                                                                                                                                                                                                                                                                                                                                                                                                                                                                                                                                                                                                                                                                                                                                                                                                                                                                      |
| 8153322 | 0.399208 | 0.1039  | chr8  | 143689412 | 143692835 | 5  | 30 | NM_015193 // ARC // activity-regulated cytoskeleton-associated protein // 8q24.3 // 23237 /// ENST00000356613 // ARC // activity-regulated cytoskeleton-associated protein (ARC)                                                                                                                                                                                                                                                                                                                                                                                                                                                                                                                                                                                                                                                                                                                                                                                                                                                             |
| 8152719 | 0.453276 | 0.0925  | chr8  | 124762215 | 124818828 | 5  | 30 | NM_001003954 // ANXA13 // annexin A13 // 8q24.13 // 312 /// NM_004306 // ANXA13 // annexin A13 // 8q24.13 // 312 /// ENST00000262219 // ANXA13 // annexin A13 (ANXA13)                                                                                                                                                                                                                                                                                                                                                                                                                                                                                                                                                                                                                                                                                                                                                                                                                                                                       |
| 8148512 | 0.483561 | 0.0864  | chr8  | 142513827 | 142517232 | 5  | 8  | ENST00000355850 // ENSEMBL Transcript // cdna:known chromosome:NCBI36:8:142513827:142517232:1<br>gene:ENSG00000184334 // chr8 // 100 // 100 // 8 // 8 // 0                                                                                                                                                                                                                                                                                                                                                                                                                                                                                                                                                                                                                                                                                                                                                                                                                                                                                   |
| 8036004 | 0.560592 | 0.0718  | chr19 | 38482690  | 38485270  | 5  | 29 | NM_004364 // CEBPA // CCAAT/enhancer binding protein (C/EBP)                                                                                                                                                                                                                                                                                                                                                                                                                                                                                                                                                                                                                                                                                                                                                                                                                                                                                                                                                                                 |
| 8148220 | 0.972111 | -0.0043 | chr8  | 124933408 | 125201483 | 5  | 48 | NM_001039112 // FER1L6 // fer-1-like 6 (C. elegans) // --- // 654463                                                                                                                                                                                                                                                                                                                                                                                                                                                                                                                                                                                                                                                                                                                                                                                                                                                                                                                                                                         |
| 8061564 | 0.959377 | -0.0063 | chr20 | 29656747  | 29657979  | 5  | 32 | NM_181353 // ID1 // inhibitor of DNA binding 1                                                                                                                                                                                                                                                                                                                                                                                                                                                                                                                                                                                                                                                                                                                                                                                                                                                                                                                                                                                               |
| 8153039 | 0.741517 | -0.0407 | chr8  | 134837037 | 134837098 | 6  | 36 | ENST00000385767 // ENSEMBL ncRNA // ncrna:Mt_tRNA_pseudogene<br>chromosome:NCBI36:8:134837037:134837098:-1 gene:ENSG00000208502 // chr8 // 100 // 94 // 34 // 34 // 0<br>/// ENST00000385831 // ENSEMBL ncRNA // ncrna:Mt_tRNA_pseudogene<br>chromosome:NCBI36:2:117500310:117500382:-1 gene:ENSG00000208566 // chr8 // 86 // 97 // 30 // 35 // 0 /// ENST00000385604 // ENSEMBL ncRNA // ncrna:Mt_tRNA_pseudogene<br>chromosome:NCBI36:7:141148515:141148587:1 gene:ENSG00000208339 // chr8 // 60 // 97 // 21 // 35 // 0 /// ENST00000388363 // ENSEMBL ncRNA // ncrna:Mt_tRNA_pseudogene<br>chromosome:NCBI36:X:55222073:55222145:1 gene:ENSG00000211098 // chr8 // 40 // 97 // 14 // 35 // 1 /// ENST00000385967 // ENSEMBL ncRNA // ncrna:Mt_tRNA_pseudogene<br>chromosome:NCBI36:8:112016133:112016204:1 gene:ENSG00000208702 // chr8 // 24 // 94 // 8 // 34 // 1 /// ENST00000385986 // ENSEMBL ncRNA // ncrna:Mt_tRNA_pseudogene<br>chromosome:NCBI36:3:154120272:154120344:1 gene:ENSG00000208721 // chr8 // 9 // 97 // 3 // 35 // 1 |



|                                                                                                                            |          |         |      |           |           |   |   |                                                                                                                                                                                                                                                                                                                                                                                                                                                                                                                                                                                                                                                                                                                                                                                 |
|----------------------------------------------------------------------------------------------------------------------------|----------|---------|------|-----------|-----------|---|---|---------------------------------------------------------------------------------------------------------------------------------------------------------------------------------------------------------------------------------------------------------------------------------------------------------------------------------------------------------------------------------------------------------------------------------------------------------------------------------------------------------------------------------------------------------------------------------------------------------------------------------------------------------------------------------------------------------------------------------------------------------------------------------|
| 8148446                                                                                                                    | 0.437147 | -0.0958 | chr8 | 134836879 | 134836946 | 6 | 8 | <p>ENST00000388256 // ENSEMBL ncRNA // ncrna:Mt_tRNA_pseudogene<br/>         chromosome:NCBI36:11:102782085:102782152:-1 gene:ENSG00000210991 // chr8 // 100 // 100 // 8 // 8 // 0<br/>         /// ENST00000387858 // ENSEMBL ncRNA // ncrna:Mt_tRNA_pseudogene<br/>         chromosome:NCBI36:8:32994108:32994175:1 gene:ENSG00000210593 // chr8 // 100 // 100 // 8 // 8 // 0 ///<br/>         ENST00000385769 // ENSEMBL ncRNA // ncrna:Mt_tRNA_pseudogene<br/>         chromosome:NCBI36:8:134836879:134836946:1 gene:ENSG00000208504 // chr8 // 100 // 100 // 8 // 8 // 0 ///<br/>         ENST00000388466 // ENSEMBL ncRNA // ncrna:Mt_tRNA_pseudogene<br/>         chromosome:NCBI36:9:82369696:82369762:-1 gene:ENSG00000211201 // chr8 // 63 // 100 // 5 // 8 // 0</p> |
| * These genes were highly amplified in 4 samples, but were within 10 kb of a copy number breakpoint of 5 amplified samples |          |         |      |           |           |   |   |                                                                                                                                                                                                                                                                                                                                                                                                                                                                                                                                                                                                                                                                                                                                                                                 |
