# Supplementary material for: Identification of Candidate Growth Promoting Genes in Ovarian Cancer through Integrated Copy Number and Expression Analysis
Source: PubMed Central journal article supplement (PMC2851616; doi:10.1371/journal.pone.0009983), 2010-04-08

A

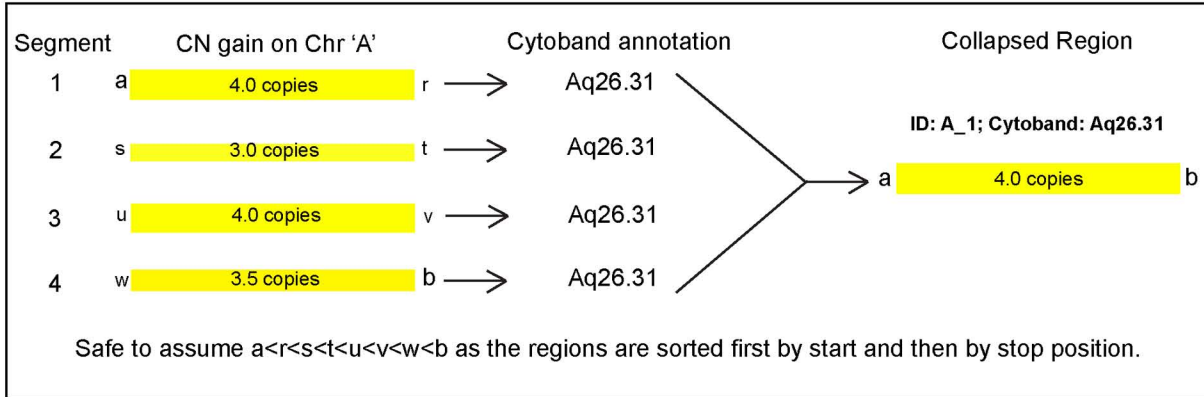

B

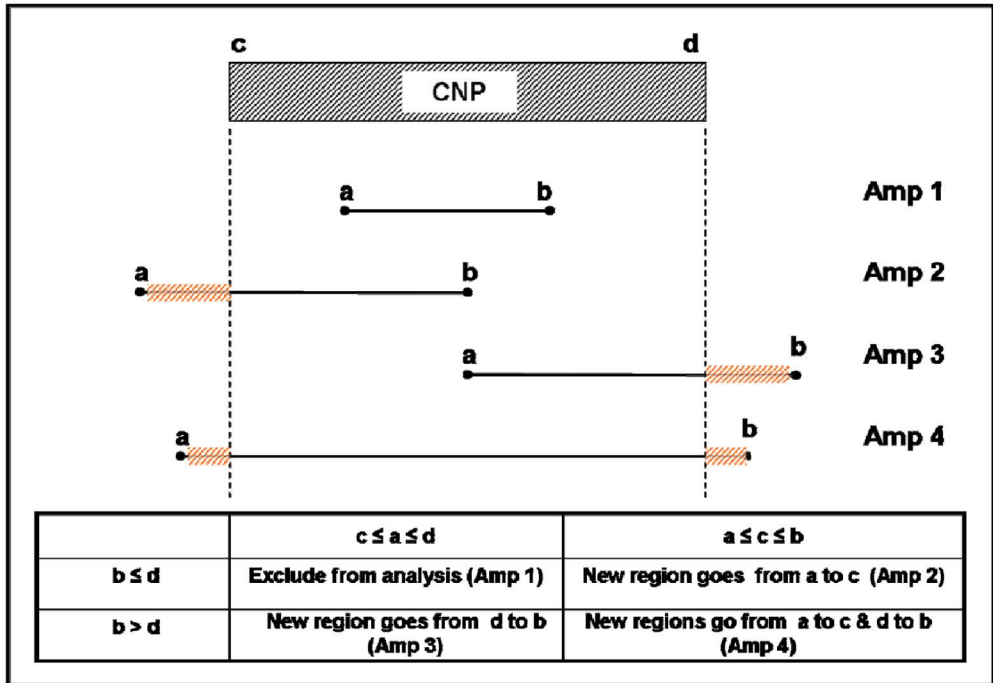

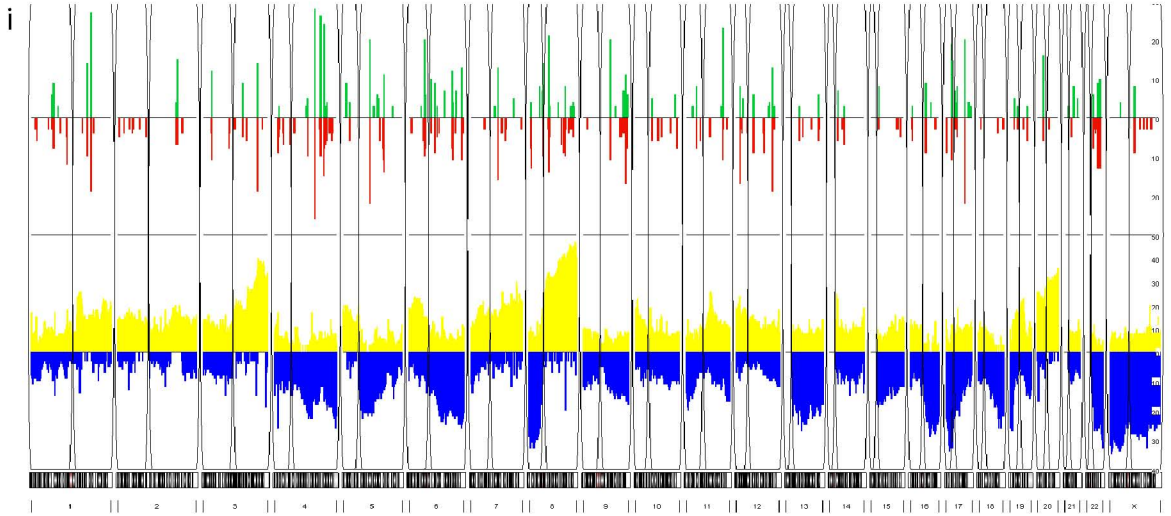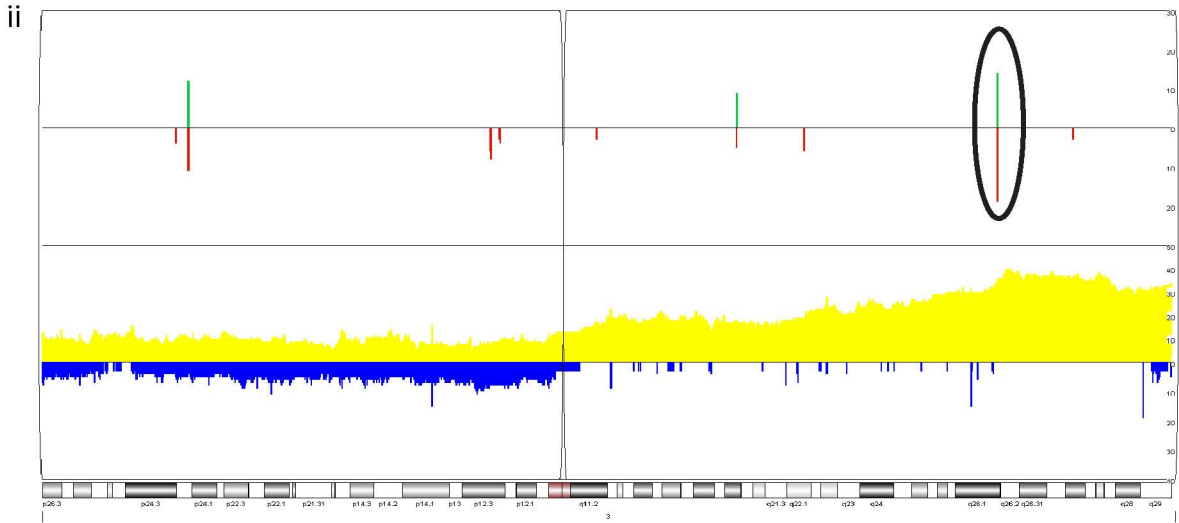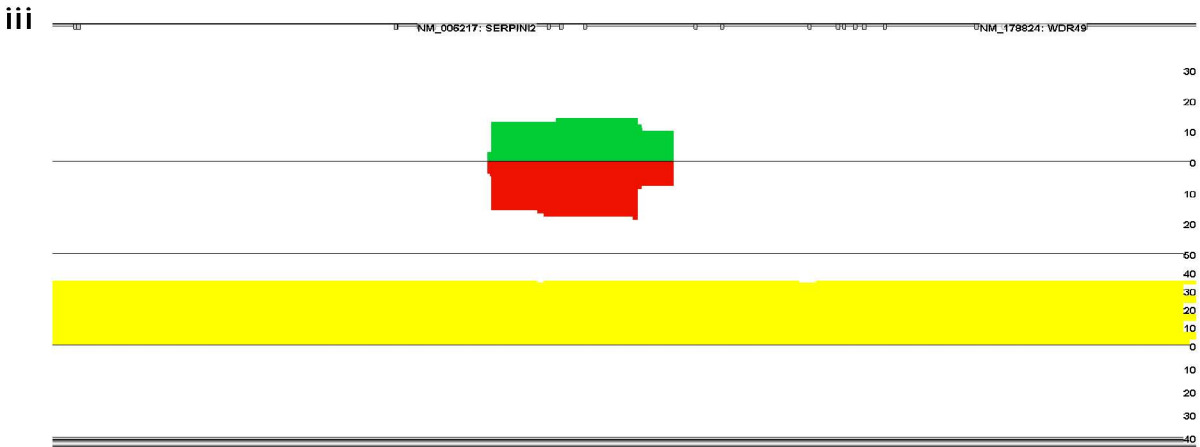

Supplement: pone.0009983.s008.pdf [file pone.0009983.s008.pdf]
